# Supplementary material for: Highly efficient heterogeneous copper-catalyzed decarboxylative cross-coupling of potassium polyfluorobenzoates with aryl halides leading to polyfluorobiaryls
Source: Royal Society of Chemistry journal article supplement (doi:10.1039/c7ra05711c), 2017-01-01
Supplement: c7ra05711c1.pdf [file c7ra05711c1.pdf]

## Supporting Information for:

### Highly efficient heterogeneous copper-catalyzed decarboxylative cross-coupling of potassium polyfluorobenzoates with aryl halides leading to polyfluorobiaryls

Yang Lin<sup>a</sup>, Mingzhong Cai<sup>b\*</sup>, Zhiqiang Fang<sup>a</sup> and Hong Zhao<sup>a\*</sup>

<sup>a</sup> School of Chemistry & Chemical Engineering, Guangdong Cosmetics Engineering & Technology Research Center, Guangdong Pharmaceutical University, Guangzhou 510006, P. R. China

<sup>b</sup> College of Chemistry & Chemical Engineering, Jiangxi Normal University, Nanchang 330022, P. R. China

E-mail: mzcai@jxnu.edu.cn; zhaohong1001@sina.com

#### The Spectral Data of Polyfluorobiaryls 3a-3u:

**2,3,4,5,6-Pentafluorobiphenyl (3a).**<sup>1</sup> White solid, Mp: 110-111 °C. <sup>1</sup>H NMR (400 MHz, CDCl<sub>3</sub>): δ 7.52-7.39 (m, 5H). <sup>13</sup>C NMR (100 MHz, CDCl<sub>3</sub>): δ 144.3 (dm, *J*<sub>F</sub> = 246.1 Hz), 140.6 (dm, *J*<sub>F</sub> = 240.9 Hz), 137.9 (dm, *J*<sub>F</sub> = 250.0 Hz), 130.2, 129.4, 128.8, 126.5, 116.1 (td, *J*<sub>F</sub> = 17.3, 4.0 Hz). <sup>19</sup>F NMR (376 MHz, CDCl<sub>3</sub>): δ -143.3 (dd, *J*<sub>F</sub> = 22.8, 8.2 Hz, 2F), -155.8 (t, *J*<sub>F</sub> = 20.9 Hz, 1F), -162.4 (td, *J*<sub>F</sub> = 22.8, 8.3 Hz, 2F).

**2,3,4,5,6-Pentafluoro-4'-nitrobiphenyl (3b).**<sup>1</sup> Yellow solid, Mp: 87-88 °C. <sup>1</sup>H NMR (400 MHz, CDCl<sub>3</sub>): δ 8.26 (d, *J* = 8.8 Hz, 2H), 7.56 (d, *J* = 8.4 Hz, 2H). <sup>13</sup>C NMR (100 MHz, CDCl<sub>3</sub>): δ 148.4, 144.3 (dm, *J*<sub>F</sub> = 248.4 Hz), 141.5 (dm, *J*<sub>F</sub> = 254.8 Hz), 138.2 (dm, *J*<sub>F</sub> = 253.0 Hz), 133.1, 131.5, 124.0, 114.0 (td, *J*<sub>F</sub> = 16.7, 4.2 Hz). <sup>19</sup>F NMR (376 MHz, CDCl<sub>3</sub>): δ -142.7 (dd, *J*<sub>F</sub> = 22.3, 8.0 Hz, 2F), -152.9 (t, *J*<sub>F</sub> = 20.8 Hz, 1F), -161.2 (td, *J*<sub>F</sub> = 21.2, 7.1 Hz, 2F).

**2',3',4',5',6'-Pentafluorobiphenyl-4-carbonitrile (3c).**<sup>2</sup> Yellow solid, Mp: 124-125 °C. <sup>1</sup>H NMR (400 MHz, CDCl<sub>3</sub>): δ 7.81 (d, *J* = 8.4 Hz, 2H), 7.59 (d, *J* = 8.4 Hz, 2H).

$^{13}\text{C}$  NMR (100 MHz,  $\text{CDCl}_3$ ):  $\delta$  144.2 (dm,  $J_{\text{F}} = 249.9$  Hz), 141.3 (dm,  $J_{\text{F}} = 254.6$  Hz), 138.1 (dm,  $J_{\text{F}} = 250.7$  Hz), 132.6, 131.3, 131.1, 118.2, 114.3 (td,  $J_{\text{F}} = 16.6, 4.1$  Hz), 113.5.  $^{19}\text{F}$  NMR (376 MHz,  $\text{CDCl}_3$ ):  $\delta$  -142.8 (dd,  $J = 22.2, 7.9$  Hz, 2F), -153.1 (t,  $J = 20.9$  Hz, 1F), -161.1 (td,  $J = 21.5, 7.2$  Hz, 2F).

**4'-Chloro-2,3,4,5,6-pentafluorobiphenyl (3d).**<sup>3</sup> White solid, Mp: 84-85 °C.  $^1\text{H}$  NMR (400 MHz,  $\text{CDCl}_3$ ):  $\delta$  7.46 (d,  $J = 8.4$  Hz, 2H), 7.36 (d,  $J = 8.4$  Hz, 2H).  $^{13}\text{C}$  NMR (100 MHz,  $\text{CDCl}_3$ ):  $\delta$  144.2 (dm,  $J_{\text{F}} = 246.3$  Hz), 140.8 (dm,  $J_{\text{F}} = 255.0$  Hz), 138.0 (dm,  $J_{\text{F}} = 249.6$  Hz), 135.8, 131.6, 129.2, 124.9, 115.0 (td,  $J_{\text{F}} = 17.0, 4.1$  Hz).  $^{19}\text{F}$  NMR (376 MHz,  $\text{CDCl}_3$ ):  $\delta$  -143.2 (dd,  $J_{\text{F}} = 22.5, 7.9$  Hz, 2F), -155.0 (t,  $J_{\text{F}} = 20.9$  Hz, 1F), -162.0 (td,  $J_{\text{F}} = 22.6, 8.3$  Hz, 2F).

**2,3,4,4',5,6-Hexafluorobiphenyl (3e).**<sup>3</sup> White solid, Mp: 114-115 °C.  $^1\text{H}$  NMR (400 MHz,  $\text{CDCl}_3$ ):  $\delta$  7.45-7.37 (m, 2H), 7.22-7.14 (m, 2H).  $^{13}\text{C}$  NMR (100 MHz,  $\text{CDCl}_3$ ):  $\delta$  163.3 (d,  $J_{\text{F}} = 249.9$  Hz), 144.3 (dm,  $J_{\text{F}} = 246.1$  Hz), 140.6 (dm,  $J_{\text{F}} = 252.3$  Hz), 137.9 (dm,  $J_{\text{F}} = 249.7$  Hz), 132.2 (d,  $J_{\text{F}} = 8.4$  Hz), 122.4, 116.1 (d,  $J_{\text{F}} = 22.0$  Hz), 115.1 (td,  $J_{\text{F}} = 17.2, 4.0$  Hz).  $^{19}\text{F}$  NMR (376 MHz,  $\text{CDCl}_3$ ):  $\delta$  -111.4 (s, 1F), -143.4 (dd,  $J_{\text{F}} = 22.7, 8.2$  Hz, 2F), -155.4 (t,  $J_{\text{F}} = 20.9$  Hz, 1F), -162.2 (td,  $J_{\text{F}} = 22.7, 8.2$  Hz, 2F).

**2,3,4,5,6-Pentafluoro-4'-(trifluoromethyl)biphenyl (3f).**<sup>4</sup> White solid, Mp: 57-58 °C.  $^1\text{H}$  NMR (400 MHz,  $\text{CDCl}_3$ ):  $\delta$  7.76 (d,  $J = 8.4$  Hz, 2H), 7.57 (d,  $J = 8.0$  Hz, 2H).  $^{13}\text{C}$  NMR (100 MHz,  $\text{CDCl}_3$ ):  $\delta$  144.3 (dm,  $J_{\text{F}} = 247.5$  Hz), 141.1 (dm,  $J_{\text{F}} = 253.8$  Hz), 138.1 (dm,  $J_{\text{F}} = 250.0$  Hz), 131.6 (q,  $J_{\text{F}} = 32.9$  Hz), 130.7, 130.2, 125.8 (q,  $J_{\text{F}} = 3.8$  Hz), 123.9 (q,  $J_{\text{F}} = 272.4$  Hz), 114.7 (td,  $J_{\text{F}} = 17.1, 4.0$  Hz).  $^{19}\text{F}$  NMR (376 MHz,  $\text{CDCl}_3$ ):  $\delta$  -63.1 (s, 3F), -143.0 (dd,  $J_{\text{F}} = 22.6, 8.3$  Hz, 2F), -153.9 (t,  $J_{\text{F}} = 20.8$  Hz, 1F), -161.6 (td,  $J_{\text{F}} = 22.9, 7.9$  Hz, 2F).

**2,3,4,5,6-Pentafluoro-3'-nitrobiphenyl (3g).**<sup>3</sup> Yellow solid, Mp: 107-108 °C.  $^1\text{H}$  NMR (400 MHz,  $\text{CDCl}_3$ ):  $\delta$  8.37-8.33 (m, 2H), 7.81 (d,  $J = 8.0$  Hz, 1H), 7.74 (t,  $J = 8.4$  Hz, 1H).  $^{13}\text{C}$  NMR (100 MHz,  $\text{CDCl}_3$ ):  $\delta$  148.5, 144.3 (dm,  $J_{\text{F}} = 248.0$  Hz), 141.4

(dm,  $J_F = 254.1$  Hz), 138.1 (dm,  $J_F = 254.1$  Hz), 136.2, 130.0, 128.2, 125.3, 124.3, 113.8 (td,  $J_F = 16.8, 3.8$  Hz).  $^{19}\text{F}$  NMR (376 MHz,  $\text{CDCl}_3$ ):  $\delta$  -143.1 (dd,  $J_F = 22.5, 8.3$  Hz, 2F), -153.2 (t,  $J_F = 20.8$  Hz, 1F), -161.2 (td,  $J_F = 21.4, 7.2$  Hz, 2F).

**2,3,4,5,6-Pentafluoro-4'-methylbiphenyl (3h).**<sup>4</sup> White solid, Mp: 117-118 °C.  $^1\text{H}$  NMR (400 MHz,  $\text{CDCl}_3$ ):  $\delta$  7.29 (s, 4H), 2.41 (s, 3H).  $^{13}\text{C}$  NMR (100 MHz,  $\text{CDCl}_3$ ):  $\delta$  144.3 (dm,  $J_F = 245.7$  Hz), 140.2 (dm,  $J_F = 250.5$  Hz), 139.5, 138.0 (dm,  $J_F = 249.8$  Hz), 130.0, 129.5, 123.5, 116.1 (td,  $J_F = 17.3, 4.1$  Hz), 21.4.  $^{19}\text{F}$  NMR (376 MHz,  $\text{CDCl}_3$ ):  $\delta$  -143.4 (dd,  $J_F = 22.9, 8.2$  Hz, 2F), -156.3 (t,  $J_F = 20.8$  Hz, 1F), -162.6 (td,  $J_F = 21.5, 7.8$  Hz, 2F).

**2,3,4,5,6-Pentafluoro-4'-methoxybiphenyl (3i).**<sup>4</sup> White solid, Mp: 122-123 °C.  $^1\text{H}$  NMR (400 MHz,  $\text{CDCl}_3$ ):  $\delta$  7.25 (d,  $J = 8.4$  Hz, 2H), 6.90 (d,  $J = 8.8$  Hz, 2H), 3.74 (s, 3H).  $^{13}\text{C}$  NMR (100 MHz,  $\text{CDCl}_3$ ):  $\delta$  160.5, 144.3 (dm,  $J_F = 245.1$  Hz), 140.1 (dm,  $J_F = 251.5$  Hz), 138.0 (dm,  $J_F = 248.7$  Hz), 131.5, 118.5, 115.9 (td,  $J_F = 17.1, 3.9$  Hz), 114.3, 55.4.  $^{19}\text{F}$  NMR (376 MHz,  $\text{CDCl}_3$ ):  $\delta$  -143.8 (dd,  $J_F = 22.9, 8.1$  Hz, 2F), -156.8 (t,  $J_F = 20.9$  Hz, 1F), -162.8 (td,  $J_F = 22.9, 8.1$  Hz, 2F).

**2,3,4,5,6-Pentafluoro-3'-methylbiphenyl (3j).**<sup>1</sup> White solid, Mp: 44-45 °C.  $^1\text{H}$  NMR (400 MHz,  $\text{CDCl}_3$ ):  $\delta$  7.36 (t,  $J = 7.4$  Hz, 1H), 7.26 (d,  $J = 7.6$  Hz, 1H), 7.23-7.17 (m, 2H), 2.40 (s, 3H).  $^{13}\text{C}$  NMR (100 MHz,  $\text{CDCl}_3$ ):  $\delta$  144.3 (dm,  $J_F = 245.9$  Hz), 140.4 (dm,  $J_F = 250.9$  Hz), 138.6, 137.9 (dm,  $J_F = 247.8$  Hz), 130.8, 130.2, 128.7, 127.3, 126.4, 116.2 (td,  $J_F = 17.3, 4.0$  Hz), 21.4.  $^{19}\text{F}$  NMR (376 MHz,  $\text{CDCl}_3$ ):  $\delta$  -143.1 (dd,  $J_F = 22.9, 8.2$  Hz, 2F), -156.0 (t,  $J_F = 20.9$  Hz, 1F), -162.4 – -162.6 (m, 2F).

**2'-Chloro-2,3,4,5,6-pentafluorobiphenyl (3k).**<sup>3</sup> Colorless liquid.  $^1\text{H}$  NMR (400 MHz,  $\text{CDCl}_3$ ):  $\delta$  7.54 (dd,  $J = 7.8, 1.0$  Hz, 1H), 7.45-7.34 (m, 2H), 7.30 (dd,  $J = 7.6, 1.6$  Hz, 1H).  $^{13}\text{C}$  NMR (100 MHz,  $\text{CDCl}_3$ ):  $\delta$  144.4 (dm,  $J_F = 246.8$  Hz), 141.4 (dm,  $J_F = 252.9$  Hz), 137.8 (dm,  $J_F = 249.6$  Hz), 134.6, 132.2, 131.1, 130.1, 127.1, 125.9, 113.7 (td,  $J_F = 19.1, 4.1$  Hz).  $^{19}\text{F}$  NMR (376 MHz,  $\text{CDCl}_3$ ):  $\delta$  -139.9 (dd,  $J_F = 23.0, 8.0$  Hz, 2F), -154.3 (t,  $J_F = 20.8$  Hz, 1F), -162.3 (td,  $J_F = 22.6, 8.3$  Hz, 2F).

**Methyl 2',3',4',5',6'-pentafluorobiphenyl-2-carboxylate (3l).**<sup>3</sup> Pale yellow solid, Mp: 59-60 °C. <sup>1</sup>H NMR (400 MHz, CDCl<sub>3</sub>): δ 8.05 (d, *J* = 7.6 Hz, 1H), 7.53 (t, *J* = 7.2 Hz, 1H), 7.45 (t, *J* = 7.2 Hz, 1H), 7.22 (d, *J* = 7.6 Hz, 1H), 3.68 (s, 3H). <sup>13</sup>C NMR (100 MHz, CDCl<sub>3</sub>): δ 166.3, 144.1 (dm, *J*<sub>F</sub> = 244.3 Hz), 140.8 (dm, *J*<sub>F</sub> = 251.6 Hz), 137.6 (dm, *J*<sub>F</sub> = 248.6 Hz), 132.6, 132.2, 131.3, 130.4, 129.8, 127.6, 116.0 (td, *J*<sub>F</sub> = 19.0, 4.0 Hz), 52.3. <sup>19</sup>F NMR (376 MHz, CDCl<sub>3</sub>): δ -142.0 (dd, *J*<sub>F</sub> = 22.7, 7.5 Hz, 2F), -156.0 (t, *J*<sub>F</sub> = 20.8 Hz, 1F), -163.2 – -163.4 (m, 2F).

**2,3,4,5,6-Pentafluoro-2'-nitro-1,1'-biphenyl (3m).**<sup>5</sup> Yellow solid, Mp: 83-84 °C. <sup>1</sup>H NMR (400 MHz, CDCl<sub>3</sub>): δ 8.13 (d, *J* = 8.0 Hz, 1H), 7.68 (t, *J* = 7.2 Hz, 1H), 7.59 (t, *J* = 7.4 Hz, 1H), 7.36 (d, *J* = 7.6 Hz, 1H). <sup>13</sup>C NMR (100 MHz, CDCl<sub>3</sub>): δ 148.6, 144.0 (dm, *J*<sub>F</sub> = 250.4 Hz), 141.5 (dm, *J*<sub>F</sub> = 254.5 Hz), 137.9 (dm, *J*<sub>F</sub> = 252.3 Hz), 133.9, 133.2, 131.1, 125.6, 121.6, 112.9 (td, *J*<sub>F</sub> = 18.6, 4.3 Hz). <sup>19</sup>F NMR (376 MHz, CDCl<sub>3</sub>): δ -141.4 (dd, *J*<sub>F</sub> = 21.9, 7.1 Hz, 2F), -153.8 (t, *J*<sub>F</sub> = 20.8 Hz, 1F), -161.8 (td, *J*<sub>F</sub> = 21.6, 7.0 Hz, 2F).

**2,3,4,5,6-Pentafluoro-2'-methylbiphenyl (3n).**<sup>2</sup> Colorless liquid. <sup>1</sup>H NMR (400 MHz, CDCl<sub>3</sub>): δ 7.41-7.33 (m, 2H), 7.31-7.26 (m, 1H), 7.18 (d, *J* = 7.2 Hz, 1H), 2.18 (s, 3H). <sup>13</sup>C NMR (100 MHz, CDCl<sub>3</sub>): δ 144.1 (dm, *J*<sub>F</sub> = 246.6 Hz), 140.7 (dm, *J*<sub>F</sub> = 252.2 Hz), 137.7 (dm, *J*<sub>F</sub> = 248.8 Hz), 137.4, 130.6, 130.5, 129.7, 126.0, 125.9, 115.5 (td, *J*<sub>F</sub> = 20.2, 4.2 Hz), 19.7. <sup>19</sup>F NMR (376 MHz, CDCl<sub>3</sub>): δ -140.6 (dd, *J*<sub>F</sub> = 23.1, 8.2 Hz, 2F), -155.5 (t, *J*<sub>F</sub> = 20.8 Hz, 1F), -162.3 (td, *J*<sub>F</sub> = 23.1, 8.4 Hz, 2F).

**2,3,4,5,6-Pentafluoro-2'-methoxybiphenyl (3o).**<sup>2</sup> Colorless liquid. <sup>1</sup>H NMR (400 MHz, CDCl<sub>3</sub>): δ 7.44 (t, *J* = 8.6 Hz, 1H), 7.22 (d, *J* = 6.8 Hz, 1H), 7.07-7.00 (m, 2H), 3.80 (s, 3H). <sup>13</sup>C NMR (100 MHz, CDCl<sub>3</sub>): δ 157.3, 144.6 (dm, *J*<sub>F</sub> = 245.6 Hz), 140.6 (dm, *J*<sub>F</sub> = 251.2 Hz), 137.7 (dm, *J*<sub>F</sub> = 248.2 Hz), 131.8, 131.2, 120.7, 115.4, 112.9 (td, *J*<sub>F</sub> = 19.3, 4.0 Hz), 111.4, 55.7. <sup>19</sup>F NMR (376 MHz, CDCl<sub>3</sub>): δ -140.3 (dd, *J*<sub>F</sub> = 22.9, 7.9 Hz, 2F), -156.3 (t, *J*<sub>F</sub> = 20.8 Hz, 1F), -163.4 (td, *J*<sub>F</sub> = 23.0, 8.1 Hz, 2F).

**3-(Pentafluorophenyl)pyridine (3p).**<sup>6</sup> Pale yellow solid, Mp: 61-62 °C. <sup>1</sup>H NMR (400 MHz, CDCl<sub>3</sub>): δ 8.62 (s, 2H), 7.70 (d, *J* = 8.0 Hz, 1H), 7.40-7.36 (m, 1H). <sup>13</sup>C NMR (100 MHz, CDCl<sub>3</sub>): δ 150.5, 150.4, 144.3 (dm, *J*<sub>F</sub> = 245.7 Hz), 141.1 (dm, *J*<sub>F</sub> = 253.2 Hz), 138.0 (dm, *J*<sub>F</sub> = 250.6 Hz), 137.6, 123.7, 123.1, 112.7 (td, *J*<sub>F</sub> = 17.0, 4.2 Hz). <sup>19</sup>F NMR (376 MHz, CDCl<sub>3</sub>): δ -142.9 (dd, *J*<sub>F</sub> = 22.2, 7.8 Hz, 2F), -153.5 (t, *J*<sub>F</sub> = 20.9 Hz, 1F), -161.2 (td, *J*<sub>F</sub> = 22.3, 8.1 Hz, 2F).

**2-(Pentafluorophenyl)pyridine (3q).**<sup>6</sup> Pale yellow solid, Mp: 60-61 °C. <sup>1</sup>H NMR (400 MHz, CDCl<sub>3</sub>): δ 8.68 (d, *J* = 4.8 Hz, 1H), 7.77-7.72 (m, 1H), 7.39 (d, *J* = 8.0 Hz, 1H), 7.32-7.27 (m, 1H). <sup>13</sup>C NMR (100 MHz, CDCl<sub>3</sub>): δ 150.3, 147.0, 144.8 (dm, *J*<sub>F</sub> = 249.0 Hz), 141.4 (dm, *J*<sub>F</sub> = 253.5 Hz), 137.8 (dm, *J*<sub>F</sub> = 250.3 Hz), 136.8, 126.0, 123.9, 115.6 (td, *J*<sub>F</sub> = 16.6, 3.9 Hz). <sup>19</sup>F NMR (376 MHz, CDCl<sub>3</sub>): δ -143.3 (dd, *J*<sub>F</sub> = 22.7, 8.5 Hz, 2F), -154.0 (t, *J*<sub>F</sub> = 20.8 Hz, 1F), -162.0 (td, *J*<sub>F</sub> = 22.1, 8.2 Hz, 2F).

**4-(Pentafluorophenyl)pyridine (3r).**<sup>6</sup> White solid, Mp: 92-93 °C. <sup>1</sup>H NMR (400 MHz, CDCl<sub>3</sub>) δ 8.77 (d, *J* = 5.0 Hz, 2H), 7.38 (d, *J* = 5.0 Hz, 2H). <sup>13</sup>C NMR (100 MHz, CDCl<sub>3</sub>): δ 150.3, 144.1 (dm, *J*<sub>F</sub> = 250.0 Hz), 141.3 (dm, *J*<sub>F</sub> = 254.6 Hz), 138.0 (dm, *J*<sub>F</sub> = 251.9 Hz), 134.7, 124.6, 113.3 (td, *J*<sub>F</sub> = 16.6, 4.3 Hz). <sup>19</sup>F NMR (376 MHz, CDCl<sub>3</sub>): δ -142.6 (dd, *J*<sub>F</sub> = 22.0, 7.9 Hz, 2F), -152.8 (td, *J*<sub>F</sub> = 21.0, 1.5 Hz, 1F), -160.9 – -161.1 (m, 2F).

**3-(Pentafluorophenyl)thiophene (3s).**<sup>6</sup> Yellow liquid. <sup>1</sup>H NMR (400 MHz, CDCl<sub>3</sub>): δ 7.64 (dd, *J* = 2.8, 1.2 Hz, 1H), 7.44 (dd, *J* = 5.0, 3.0 Hz, 1H), 7.37-7.32 (m, 1H). <sup>13</sup>C NMR (100 MHz, CDCl<sub>3</sub>): δ 144.3 (dm, *J*<sub>F</sub> = 247.1 Hz), 140.1 (dm, *J*<sub>F</sub> = 252.3 Hz), 138.1 (dm, *J*<sub>F</sub> = 248.7 Hz), 128.3 (t, *J*<sub>F</sub> = 3.6 Hz), 127.2 (t, *J*<sub>F</sub> = 4.0 Hz), 125.8, 125.7, 111.3 (td, *J*<sub>F</sub> = 16.3, 4.2 Hz). <sup>19</sup>F NMR (376 MHz, CDCl<sub>3</sub>): δ -142.0 (dd, *J*<sub>F</sub> = 22.5, 7.8 Hz, 2F), -156.4 (t, *J*<sub>F</sub> = 21.0 Hz, 1F), -162.5 (td, *J*<sub>F</sub> = 22.6, 7.9 Hz, 2F).

**1-(Pentafluorophenyl)naphthalene (3t).**<sup>6</sup> White solid, Mp: 91-92 °C. <sup>1</sup>H NMR (400 MHz, CDCl<sub>3</sub>): δ 7.95 (d, *J* = 8.4 Hz, 1H), 7.91 (d, *J* = 8.0 Hz, 1H), 7.56-7.40 (m, 5H). <sup>13</sup>C NMR (100 MHz, CDCl<sub>3</sub>): δ 144.7 (dm, *J*<sub>F</sub> = 246.0 Hz), 141.1 (dm, *J*<sub>F</sub> = 252.4 Hz),

137.9 (dm,  $J_F = 250.9$  Hz), 133.8, 131.7, 130.2, 129.1, 128.7, 127.2, 126.5, 125.3, 124.6, 123.9, 114.5 (td,  $J_F = 19.5, 3.8$  Hz).  $^{19}\text{F}$  NMR (376 MHz,  $\text{CDCl}_3$ ):  $\delta$  -139.4 (dd,  $J_F = 23.0, 8.2$  Hz, 2F), -154.7 (t,  $J_F = 20.8$  Hz, 1F), -162.0 (td,  $J_F = 22.9, 8.3$  Hz, 2F).

**Methyl 2',3',4',5',6'-pentafluorobiphenyl-4-carboxylate (3u).**<sup>2</sup> White solid, Mp: 112-113 °C.  $^1\text{H}$  NMR (400 MHz,  $\text{CDCl}_3$ ):  $\delta$  8.04 (d,  $J = 8.4$  Hz, 2H), 7.40 (d,  $J = 8.4$ , 2H), 3.85 (s, 3H).  $^{13}\text{C}$  NMR (100 MHz,  $\text{CDCl}_3$ ):  $\delta$  166.5, 144.3 (dm,  $J_F = 247.4$  Hz), 141.0 (dm,  $J_F = 253.5$  Hz), 138.1 (dm,  $J_F = 251.5$  Hz), 137.9, 131.1, 130.4, 130.0, 115.2 (td,  $J_F = 16.9, 3.9$  Hz), 52.4.  $^{19}\text{F}$  NMR (376 MHz,  $\text{CDCl}_3$ ):  $\delta$  -143.0 (dd,  $J_F = 22.5, 8.1$  Hz, 2F), -154.4 (t,  $J_F = 20.8$  Hz, 1F), -161.9 (td,  $J_F = 21.4, 7.6$  Hz, 2F).

**2,3,4,5,6-Pentafluoro-3',5'-dimethylbiphenyl (3v).**<sup>3</sup> White solid, Mp: 82-83 °C.  $^1\text{H}$  NMR (400 MHz,  $\text{CDCl}_3$ ):  $\delta$  7.10 (s, 1H), 7.02 (s, 2H), 2.38 (s, 6H).  $^{13}\text{C}$  NMR (100 MHz,  $\text{CDCl}_3$ ):  $\delta$  144.3 (dm,  $J_F = 245.7$  Hz), 140.3 (dm,  $J_F = 245.1$  Hz), 138.4, 137.9 (dm,  $J_F = 248.2$  Hz), 131.1, 127.9, 126.2, 116.4 (td,  $J_F = 17.7, 4.3$  Hz), 21.3.  $^{19}\text{F}$  NMR (376 MHz,  $\text{CDCl}_3$ ):  $\delta$  -143.0 (dd,  $J_F = 23.0, 8.3$  Hz, 2F), -156.3 (t,  $J_F = 20.9$  Hz, 1F), -162.6 (td,  $J_F = 22.5, 8.2$  Hz, 2F).

**2,6-Difluoro-4'-nitrobiphenyl (5a).**<sup>7</sup> Pale yellow solid, Mp: 117-118 °C.  $^1\text{H}$  NMR (400 MHz,  $\text{CDCl}_3$ ):  $\delta$  8.22 (d,  $J = 8.4$  Hz, 2H), 7.57 (d,  $J = 8.4$  Hz, 2H), 7.35-7.24 (m, 1H), 6.95 (t,  $J = 8.0$  Hz, 2H).  $^{13}\text{C}$  NMR (100 MHz,  $\text{CDCl}_3$ ):  $\delta$  159.8 (dd,  $J_F = 250.4, 6.5$  Hz), 147.6, 136.0, 131.4 (t,  $J_F = 2.2$  Hz), 130.5 (t,  $J_F = 10.4$  Hz), 123.5, 116.4 (t,  $J_F = 18.1$  Hz), 112.0 (dd,  $J_F = 19.5, 6.6$  Hz).  $^{19}\text{F}$  NMR (376 MHz,  $\text{CDCl}_3$ ):  $\delta$  -114.1 (s, 2F).

**2,6-Difluoro-4'-methoxybiphenyl (5b).**<sup>3</sup> White solid, Mp: 57-58 °C.  $^1\text{H}$  NMR (400 MHz,  $\text{CDCl}_3$ ):  $\delta$  7.40 (d,  $J = 8.8$  Hz, 2H), 7.25-7.17 (m, 1H), 7.00-6.91 (m, 4H), 3.82 (s, 3H).  $^{13}\text{C}$  NMR (100 MHz,  $\text{CDCl}_3$ ):  $\delta$  160.2 (dd,  $J_F = 247.8, 7.2$  Hz), 159.5, 131.6 (t,  $J_F = 1.9$  Hz), 128.4 (t,  $J_F = 10.4$  Hz), 121.3, 118.2 (t,  $J_F = 18.6$  Hz), 113.8, 111.6 (dd,  $J_F = 19.3, 7.4$  Hz), 55.3.  $^{19}\text{F}$  NMR (376 MHz,  $\text{CDCl}_3$ ):  $\delta$  -114.7 (s, 2F).

**2,6-Difluoro-3'-nitro-1,1'-biphenyl (5c).**<sup>8</sup> Pale yellow solid, Mp: 119-120 °C. <sup>1</sup>H NMR (400 MHz, CDCl<sub>3</sub>): δ 8.36 (s, 1H), 8.26 (d, *J* = 8.4 Hz, 1H), 7.80 (d, *J* = 7.6 Hz, 1H), 7.64 (t, *J* = 8.0 Hz, 1H), 7.41-7.33 (m, 1H), 7.08-6.99 (m, 2H). <sup>13</sup>C NMR (100 MHz, CDCl<sub>3</sub>): δ 159.9 (dd, *J*<sub>F</sub> = 248.5, 6.5 Hz), 148.3, 136.4 (t, *J*<sub>F</sub> = 2.0 Hz), 130.9, 130.3 (t, *J*<sub>F</sub> = 10.4 Hz), 129.3, 125.4 (t, *J*<sub>F</sub> = 2.2 Hz), 123.2, 116.2 (t, *J*<sub>F</sub> = 18.0 Hz), 112.0 (dd, *J*<sub>F</sub> = 19.3, 6.6 Hz). <sup>19</sup>F NMR (376 MHz, CDCl<sub>3</sub>): δ -114.6 (s, 2F).

**2,6-Difluoro-2'-nitro-1,1'-biphenyl (5d).**<sup>9</sup> Pale yellow solid, Mp: 108-109 °C. <sup>1</sup>H NMR (400 MHz, CDCl<sub>3</sub>): δ 8.07 (dd, *J* = 8.0, 0.8 Hz, 1H), 7.65-7.60 (m, 1H), 7.54-7.49 (m, 1H), 7.40 (d, *J* = 7.6 Hz, 1H), 7.32-7.24 (m, 1H), 6.95-6.88 (m, 2H). <sup>13</sup>C NMR (100 MHz, CDCl<sub>3</sub>): δ 159.6 (dd, *J*<sub>F</sub> = 248.5, 6.6 Hz), 149.0, 133.2, 133.0, 130.2 (t, *J*<sub>F</sub> = 10.2 Hz), 129.7, 124.9, 124.4, 115.0 (t, *J*<sub>F</sub> = 19.9 Hz), 111.6 (dd, *J*<sub>F</sub> = 19.0, 6.3 Hz). <sup>19</sup>F NMR (376 MHz, CDCl<sub>3</sub>): δ -113.5 (s, 2F).

**2,6-Difluoro-2'-methoxybiphenyl (5e).**<sup>3</sup> Colorless liquid. <sup>1</sup>H NMR (400 MHz, CDCl<sub>3</sub>): δ 7.41-7.35 (m, 1H), 7.29-7.22 (m, 2H), 7.04-6.97 (m, 2H), 6.96-6.90 (m, 2H), 3.77 (s, 3H). <sup>13</sup>C NMR (100 MHz, CDCl<sub>3</sub>): δ 160.6 (dd, *J*<sub>F</sub> = 248.2, 7.5 Hz), 157.4, 131.9, 130.1, 128.9 (t, *J*<sub>F</sub> = 10.2 Hz), 120.4, 118.4, 115.4 (t, *J*<sub>F</sub> = 20.7 Hz), 111.2 (dd, *J*<sub>F</sub> = 19.1, 7.0 Hz), 111.1, 55.7. <sup>19</sup>F NMR (376 MHz, CDCl<sub>3</sub>): δ -112.1 (s, 2F).

**2,3,6-Trifluoro-4'-nitro-biphenyl (5f).** Pale yellow solid, Mp: 125-126 °C. <sup>1</sup>H NMR (400 MHz, CDCl<sub>3</sub>): δ 8.33 (d, *J* = 8.8 Hz, 2H), 7.67 (d, *J* = 8.8 Hz, 2H), 7.28-7.19 (m, 1H), 7.03-6.96 (m, 1H). <sup>13</sup>C NMR (100 MHz, CDCl<sub>3</sub>): δ 155.0 (ddd, *J*<sub>F</sub> = 247.0, 4.3, 2.8 Hz), 148.0, 147.7 (dm, *J*<sub>F</sub> = 248.2 Hz), 147.5 (dm, *J*<sub>F</sub> = 244.6 Hz), 135.1 (d, *J*<sub>F</sub> = 1.9 Hz), 131.4 (t, *J*<sub>F</sub> = 2.2 Hz), 123.6, 118.2 (dd, *J*<sub>F</sub> = 20.1, 14.5 Hz), 117.4 (qd, *J*<sub>F</sub> = 10.0, 1.5 Hz), 111.5 (ddd, *J*<sub>F</sub> = 25.1, 6.6, 4.3 Hz). <sup>19</sup>F NMR (376 MHz, CDCl<sub>3</sub>): δ -119.3 (dd, *J*<sub>F</sub> = 15.2, 1.9 Hz, 1F), -137.3 (dd, *J*<sub>F</sub> = 21.1, 1.9 Hz, 1F), -141.0 (dd, *J*<sub>F</sub> = 21.0, 15.4 Hz, 1F). HRMS calcd for C<sub>12</sub>H<sub>6</sub>F<sub>3</sub>NO<sub>2</sub><sup>+</sup> [M<sup>+</sup>]: 253.0351, found 253.0348.

**2',3',6'-Trifluorobiphenyl-4-carbonitrile (5g).**<sup>3</sup> White solid, Mp: 152-153 °C. <sup>1</sup>H

NMR (400 MHz, CDCl<sub>3</sub>):  $\delta$  7.67 (d,  $J$  = 8.4 Hz, 2H), 7.50 (d,  $J$  = 8.0 Hz, 2H), 7.18-7.07 (m, 1H), 6.92-6.85 (m, 1H). <sup>13</sup>C NMR (100 MHz, CDCl<sub>3</sub>):  $\delta$  155.0 (ddd,  $J_F$  = 245.2, 4.4, 2.8 Hz), 147.7 (dm,  $J_F$  = 249.9 Hz), 147.5 (dm,  $J_F$  = 244.4 Hz), 133.2 (d,  $J_F$  = 1.8 Hz), 132.2, 131.1 (t,  $J_F$  = 2.2 Hz), 118.5 (dd,  $J_F$  = 20.2, 14.3 Hz), 118.4, 117.2 (qd,  $J_F$  = 9.7, 1.4 Hz), 112.7, 111.4 (ddd,  $J_F$  = 24.9, 6.7, 4.3 Hz). <sup>19</sup>F NMR (376 MHz, CDCl<sub>3</sub>):  $\delta$  -119.5 (dd,  $J_F$  = 15.2, 2.0 Hz, 1F), -137.5 (dd,  $J_F$  = 21.1, 2.0 Hz, 1F), -141.1 (dd,  $J_F$  = 21.1, 15.2 Hz, 1F).

**2,3,6-Trifluoro-4'-methoxybiphenyl (5h).**<sup>3</sup> White solid, Mp: 54-55 °C. <sup>1</sup>H NMR (400 MHz, CDCl<sub>3</sub>):  $\delta$  7.39 (d,  $J$  = 8.4 Hz, 2H), 7.09-7.02 (m, 1H), 6.99 (d,  $J$  = 8.8 Hz, 2H), 6.90-6.84 (m, 1H), 3.82 (s, 3H). <sup>13</sup>C NMR (100 MHz, CDCl<sub>3</sub>):  $\delta$  159.9, 155.4 (ddd,  $J_F$  = 244.2, 4.7, 2.6 Hz), 147.9 (dq,  $J_F$  = 249.0, 7.3 Hz), 147.6 (ddd,  $J_F$  = 244.3, 13.8, 3.6 Hz), 131.5, 120.5 (d,  $J_F$  = 1.7 Hz), 120.0 (dd,  $J_F$  = 20.6, 15.1 Hz), 115.1 (qd,  $J_F$  = 9.8, 1.0 Hz), 114.0, 110.8 (ddd,  $J_F$  = 25.7, 6.8, 4.2 Hz), 55.3. <sup>19</sup>F NMR (376 MHz, CDCl<sub>3</sub>):  $\delta$  -120.0 (dd,  $J_F$  = 15.0, 3.8 Hz, 1F), -138.2 (ddd,  $J_F$  = 21.7, 3.9, 1.2 Hz, 1F), -142.1 (dd,  $J_F$  = 21.5, 15.0 Hz, 1F).

**2,3,6-Trifluoro-2'-methoxybiphenyl (5i).** Colorless liquid. <sup>1</sup>H NMR (400 MHz, CDCl<sub>3</sub>):  $\delta$  7.43-7.36 (m, 1H), 7.27-7.23 (m, 1H), 7.14-6.98 (m, 3H), 6.89-6.82 (m, 1H), 3.78 (s, 3H). <sup>13</sup>C NMR (100 MHz, CDCl<sub>3</sub>):  $\delta$  157.2, 155.8 (ddd,  $J_F$  = 244.6, 5.2, 2.5 Hz), 148.3 (dq,  $J_F$  = 249.7, 7.7 Hz), 147.3 (ddd,  $J_F$  = 243.9, 13.7, 3.6 Hz), 131.8, 130.6, 120.5, 117.4 (d,  $J_F$  = 1.7 Hz), 117.3 (dd,  $J_F$  = 22.7, 17.1 Hz), 115.8 (qd,  $J_F$  = 9.7, 1.0 Hz), 111.3, 110.4 (ddd,  $J_F$  = 25.3, 6.7, 4.2 Hz), 55.7. <sup>19</sup>F NMR (376 MHz, CDCl<sub>3</sub>):  $\delta$  -117.4 (dd,  $J_F$  = 14.8, 3.0 Hz, 1F), -134.7 (dd,  $J_F$  = 21.8, 2.9 Hz, 1F), -142.9 (dd,  $J_F$  = 21.8, 14.8 Hz, 1F). HRMS calcd for C<sub>13</sub>H<sub>9</sub>F<sub>3</sub>O<sup>+</sup> [M<sup>+</sup>]: 238.0605, found 238.0610.

**3-(2',3',6'-Trifluorophenyl)pyridine (5j).** Pale yellow solid, Mp: 39-40 °C. <sup>1</sup>H NMR (400 MHz, CDCl<sub>3</sub>):  $\delta$  8.73 (s, 1H), 8.66 (dd,  $J$  = 5.0, 1.4 Hz, 1H), 7.81 (d,  $J$  = 8.0 Hz, 1H), 7.42 (dd,  $J$  = 8.0, 4.8 Hz, 1H), 7.23-7.14 (m, 1H), 7.01-6.94 (m, 1H). <sup>13</sup>C NMR (100 MHz, CDCl<sub>3</sub>):  $\delta$  155.3 (ddd,  $J_F$  = 244.8, 4.6, 2.8 Hz), 150.7 (t,  $J_F$  = 2.6 Hz),



149.8, 148.0 (dq,  $J_F = 249.8, 7.2$  Hz), 147.6 (ddd,  $J_F = 244.1, 13.3, 3.7$  Hz), 137.6 (t,  $J_F = 2.0$  Hz), 124.9, 123.4, 116.9 (dd,  $J_F = 19.9, 15.7$  Hz), 116.8 (qd,  $J_F = 9.7, 1.4$  Hz), 111.3 (ddd,  $J_F = 25.0, 6.6, 4.2$  Hz).  $^{19}\text{F}$  NMR (376 MHz,  $\text{CDCl}_3$ ):  $\delta$  -119.8 (dd,  $J_F = 15.5, 2.6$  Hz, 1F), -137.8 (d,  $J_F = 21.2$  Hz, 1F), -141.4 (dd,  $J_F = 21.2, 15.3$  Hz, 1F). HRMS calcd for  $\text{C}_{11}\text{H}_6\text{F}_3\text{N}^+$  [ $\text{M}^+$ ]: 209.0452, found 209.0453.

**2,3,5,6-Tetrafluoro-4'-nitro-1,1'-biphenyl (5k).**<sup>10</sup> Pale yellow solid, Mp: 179-180 °C.  $^1\text{H}$  NMR (400 MHz,  $\text{CDCl}_3$ ):  $\delta$  8.36 (d,  $J = 8.4$  Hz, 2H), 7.68 (d,  $J = 8.4$  Hz, 2H), 7.23-7.12 (m, 1H).  $^{13}\text{C}$  NMR (100 MHz,  $\text{CDCl}_3$ ):  $\delta$  148.3, 146.4 (dm,  $J_F = 245.4$  Hz), 143.6 (dm,  $J_F = 245.1$  Hz), 134.0, 131.3, 123.8, 119.3 (t,  $J_F = 16.1$  Hz), 106.5 (t,  $J_F = 22.5$  Hz).  $^{19}\text{F}$  NMR (376 MHz,  $\text{CDCl}_3$ ):  $\delta$  -137.9 (dd,  $J_F = 21.8, 12.8$  Hz, 2F), -143.2 (dd,  $J_F = 21.8, 12.8$  Hz, 2F).

**2',3',5',6'-Tetrafluorobiphenyl-4-carbonitrile (5l).**<sup>11</sup> White solid, Mp: 172-173 °C.  $^1\text{H}$  NMR (400 MHz,  $\text{CDCl}_3$ ):  $\delta$  7.80 (d,  $J = 8.4$  Hz, 2H), 7.60 (d,  $J = 8.0$  Hz, 2H), 7.20-7.11 (m, 1H).  $^{13}\text{C}$  NMR (100 MHz,  $\text{CDCl}_3$ ):  $\delta$  146.4 (dm,  $J_F = 245.2$  Hz), 143.6 (dm,  $J_F = 244.9$  Hz), 132.4, 132.2 (t,  $J_F = 2.2$  Hz), 131.1 (t,  $J_F = 2.3$  Hz), 119.6 (t,  $J_F = 16.1$  Hz), 118.2, 113.3, 106.3 (t,  $J_F = 22.5$  Hz).  $^{19}\text{F}$  NMR (376 MHz,  $\text{CDCl}_3$ ):  $\delta$  -138.0 (dd,  $J_F = 22.0, 13.0$  Hz, 2F), -143.5 (dd,  $J_F = 22.0, 13.0$  Hz, 2F).

**2,3,5,6-Tetrafluoro-4'-methylbiphenyl (5m).**<sup>4</sup> White solid, Mp: 89-90 °C.  $^1\text{H}$  NMR (400 MHz,  $\text{CDCl}_3$ ):  $\delta$  7.35 (d,  $J = 8.0$  Hz, 2H), 7.29 (d,  $J = 8.0$  Hz, 2H), 7.07-6.97 (m, 1H), 2.41 (s, 3H).  $^{13}\text{C}$  NMR (100 MHz,  $\text{CDCl}_3$ ):  $\delta$  146.3 (dm,  $J_F = 244.7$  Hz), 143.8 (dm,  $J_F = 245.2$  Hz), 139.3, 130.0 (t,  $J_F = 2.0$  Hz), 129.4, 124.5 (t,  $J_F = 2.2$  Hz), 121.6 (t,  $J_F = 16.6$  Hz), 104.6 (t,  $J_F = 22.6$  Hz), 21.4.  $^{19}\text{F}$  NMR (376 MHz,  $\text{CDCl}_3$ ):  $\delta$  -139.4 (dd,  $J_F = 22.4, 12.8$  Hz, 2F), -144.0 (dd,  $J_F = 22.4, 12.8$  Hz, 2F).

**2,3,5,6-Tetrafluoro-4'-methoxybiphenyl (5n).**<sup>3</sup> White solid, Mp: 107-108 °C.  $^1\text{H}$  NMR (400 MHz,  $\text{CDCl}_3$ ):  $\delta$  7.39 (d,  $J = 8.8$  Hz, 2H), 7.04-6.97 (m, 3H).  $^{13}\text{C}$  NMR (100 MHz,  $\text{CDCl}_3$ ):  $\delta$  160.3, 146.3 (dm,  $J_F = 244.7$  Hz), 143.9 (dm,  $J_F = 248.1$  Hz), 131.5 (t,  $J_F = 2.2$  Hz), 121.3 (t,  $J_F = 16.5$  Hz), 119.6 (t,  $J_F = 2.2$  Hz), 114.2, 104.3 (t,

$J_F = 22.7$  Hz), 55.3.  $^{19}\text{F}$  NMR (376 MHz,  $\text{CDCl}_3$ ):  $\delta$  -139.5 (dd,  $J_F = 22.4, 12.6$  Hz, 2F), -144.3 (dd,  $J_F = 22.4, 12.7$  Hz, 2F).

**2,3,5,6-Tetrafluoro-4-methyl-4'-nitrobiphenyl (5o).**<sup>3</sup> Pale yellow solid, Mp: 140-141 °C.  $^1\text{H}$  NMR (400 MHz,  $\text{CDCl}_3$ ):  $\delta$  8.24 (d,  $J = 8.8$  Hz, 2H), 7.57 (d,  $J = 8.4$  Hz, 2H), 2.26 (s, 3H).  $^{13}\text{C}$  NMR (100 MHz,  $\text{CDCl}_3$ ):  $\delta$  148.1, 145.5 (dm,  $J_F = 244.0$  Hz), 143.5 (dm,  $J_F = 246.5$  Hz), 134.5, 131.4 (t,  $J_F = 2.3$  Hz), 123.8, 117.1 (t,  $J_F = 19.1$  Hz), 115.8 (t,  $J_F = 16.1$  Hz), 7.8.  $^{19}\text{F}$  NMR (376 MHz,  $\text{CDCl}_3$ ):  $\delta$  -142.8 (dd,  $J_F = 21.9, 12.6$  Hz, 2F), -145.1 (dd,  $J_F = 21.7, 12.4$  Hz, 2F).

**2,3,5,6-Tetrafluoro-4'-methoxy-4-methylbiphenyl (5p).**<sup>12</sup> White solid, Mp: 117-118 °C.  $^1\text{H}$  NMR (400 MHz,  $\text{CDCl}_3$ ):  $\delta$  7.37 (d,  $J = 8.8$  Hz, 2H), 6.98 (d,  $J = 8.8$  Hz, 2H), 3.83 (s, 3H), 2.28 (t,  $J = 1.8$  Hz, 3H).  $^{13}\text{C}$  NMR (100 MHz,  $\text{CDCl}_3$ ):  $\delta$  160.1, 145.4 (dm,  $J_F = 242.2$  Hz), 143.7 (dm,  $J_F = 243.3$  Hz), 131.5 (t,  $J_F = 2.1$  Hz), 119.9 (t,  $J_F = 2.1$  Hz), 117.8 (t,  $J_F = 16.6$  Hz), 114.6 (t,  $J_F = 19.1$  Hz), 114.1, 55.3, 7.5.  $^{19}\text{F}$  NMR (376 MHz,  $\text{CDCl}_3$ ):  $\delta$  -144.5 (dd,  $J_F = 22.4, 12.6$  Hz, 2F), -146.0 (dd,  $J_F = 22.4, 12.6$  Hz, 2F).

## References

1. T. Korenaga, T. Kosaki, R. Fukumura, T. Ema and T. Sakai, *Org. Lett.*, 2005, **7**, 4915-4918.
2. M. Lafrance, D. Shore and K. Fagnou, *Org. Lett.*, 2006, **8**, 5097-5100.
3. R. Shang, Y. Fu, Y. Wang, Q. Xu, H.-Z. Yu and L. Liu, *Angew. Chem. Int. Ed.*, 2009, **48**, 9350-9354.
4. M. Lafrance, C. N. Rowley, T. K. Woo and K. Fagnou, *J. Am. Chem. Soc.*, 2006, **128**, 8754-8756.
5. K. Xie, Z. Yang, X. Zhou, X. Li, S. Wang, Z. Tan, X. An and C.-C. Guo, *Org. Lett.*, 2010, **12**, 1564-1567.
6. H. Q. Do and O. Daugulis, *J. Am. Chem. Soc.*, 2008, **130**, 1128-1129.
7. M. B. Alan, G. Sam, L. Robert and G. L. Andrew, *J. Med. Chem.*, 2012, **55**,

3923-3933.

8. S. H. Wunderlich and P. Knochel, *Angew. Chem. Int. Ed.*, 2009, **48**, 1501-1504.
9. K. Taniguchi, Y. Katsura, I. Ueda and M. Matsuo, *Chem. Pharm. Bull.*, 1992, **40**, 240-244.
10. A. Zahn, C. Brotschi and C. Leumann, *Chem. Eur. J.*, 2005, **11**, 2125-2129.
11. H. Q. Do and O. Daugulis, *J. Am. Chem. Soc.*, 2011, **133**, 13577-13586.
12. L.W. Sardzinski, W. C. Wertjes, A. M. Schnaith and D. Kalyani, *Org. Lett.*, 2015, **17**, 1256-1259.

**Copies of  $^1\text{H}$  NMR,  $^{13}\text{C}$  NMR and  $^{19}\text{F}$  NMR Spectra of Compounds  
3a-v and 5a-p**

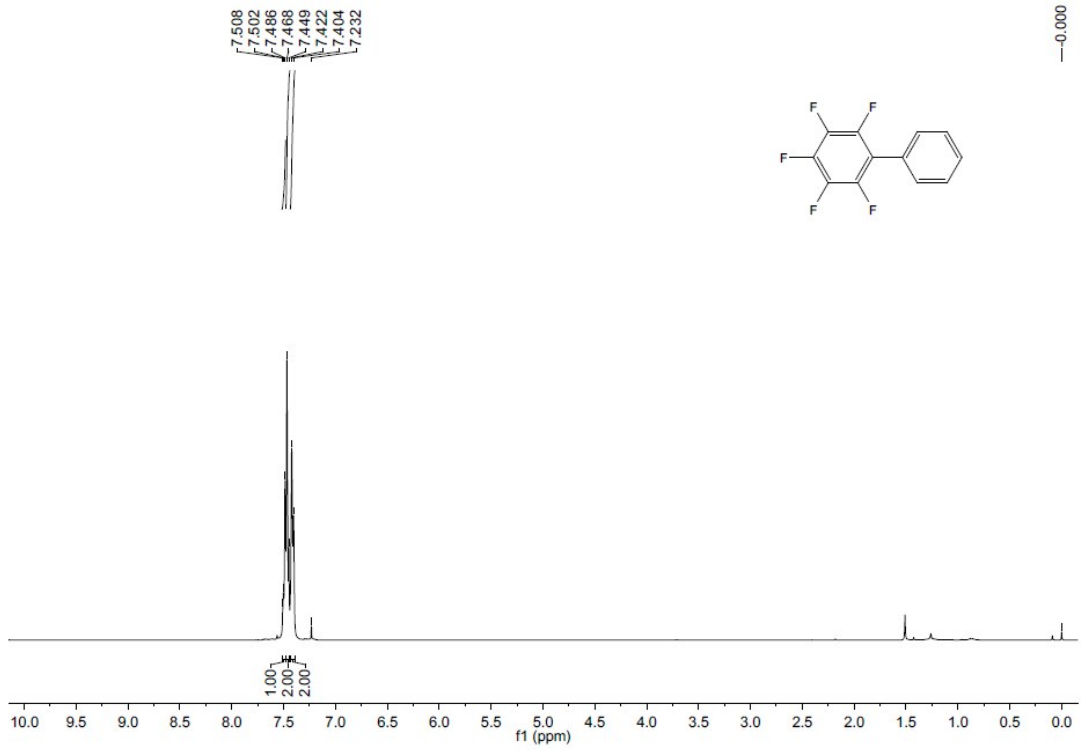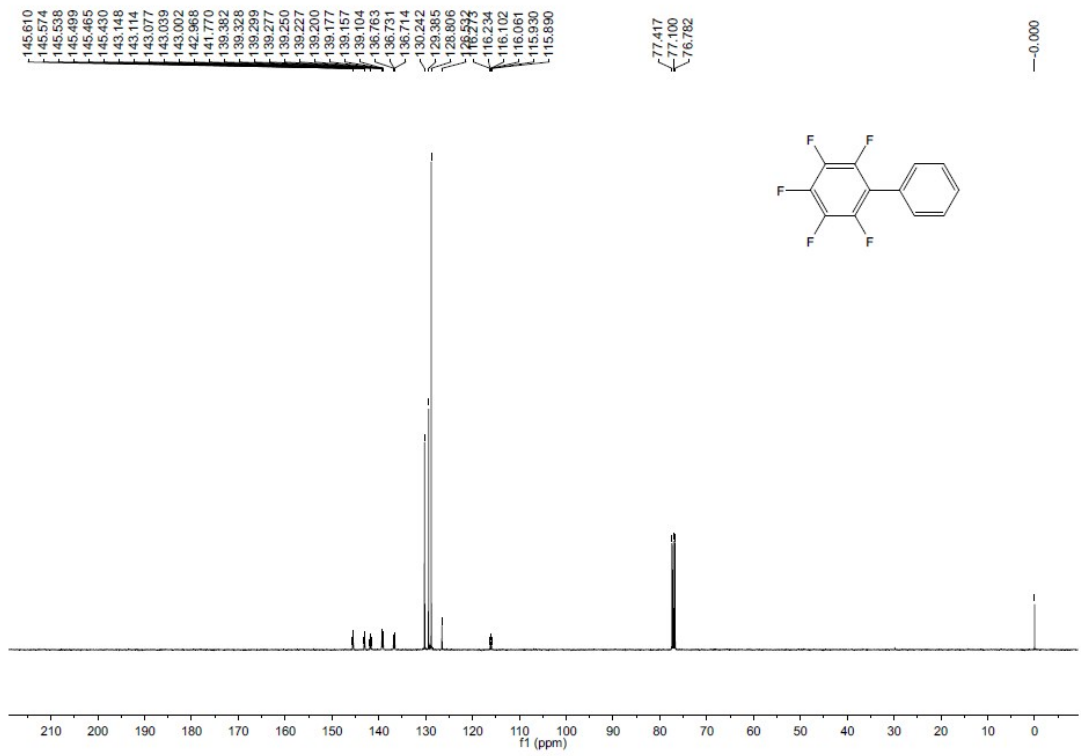

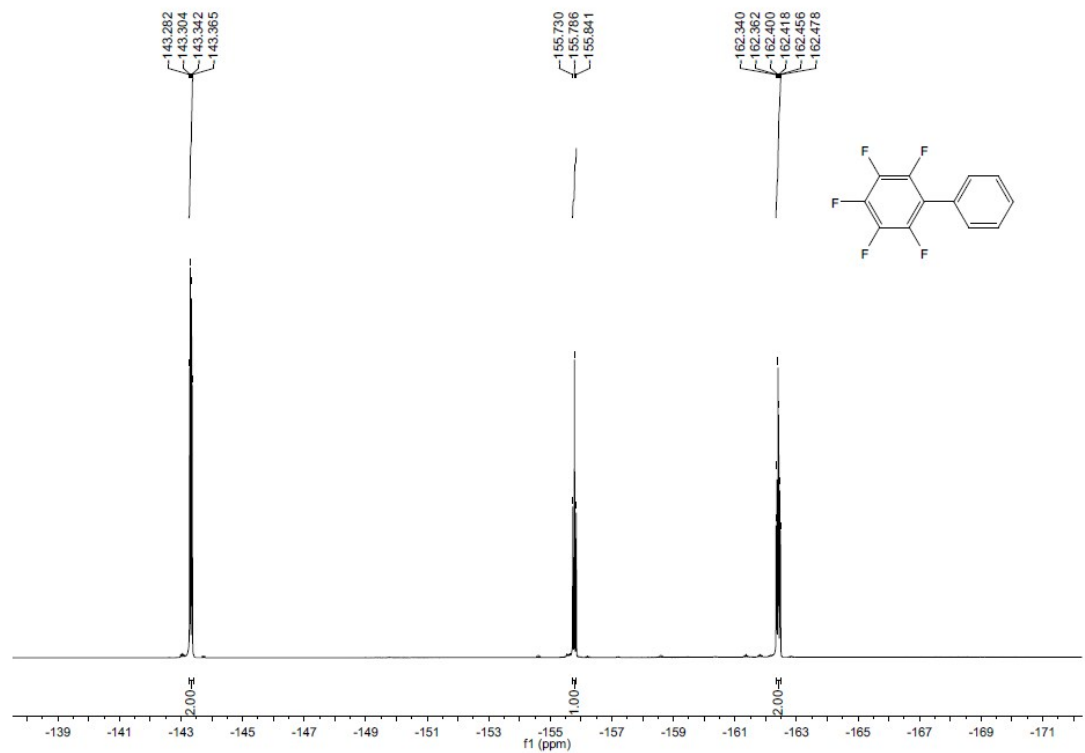

$^1\text{H}$  NMR,  $^{13}\text{C}$  NMR and  $^{19}\text{F}$  NMR spectra of **3a**

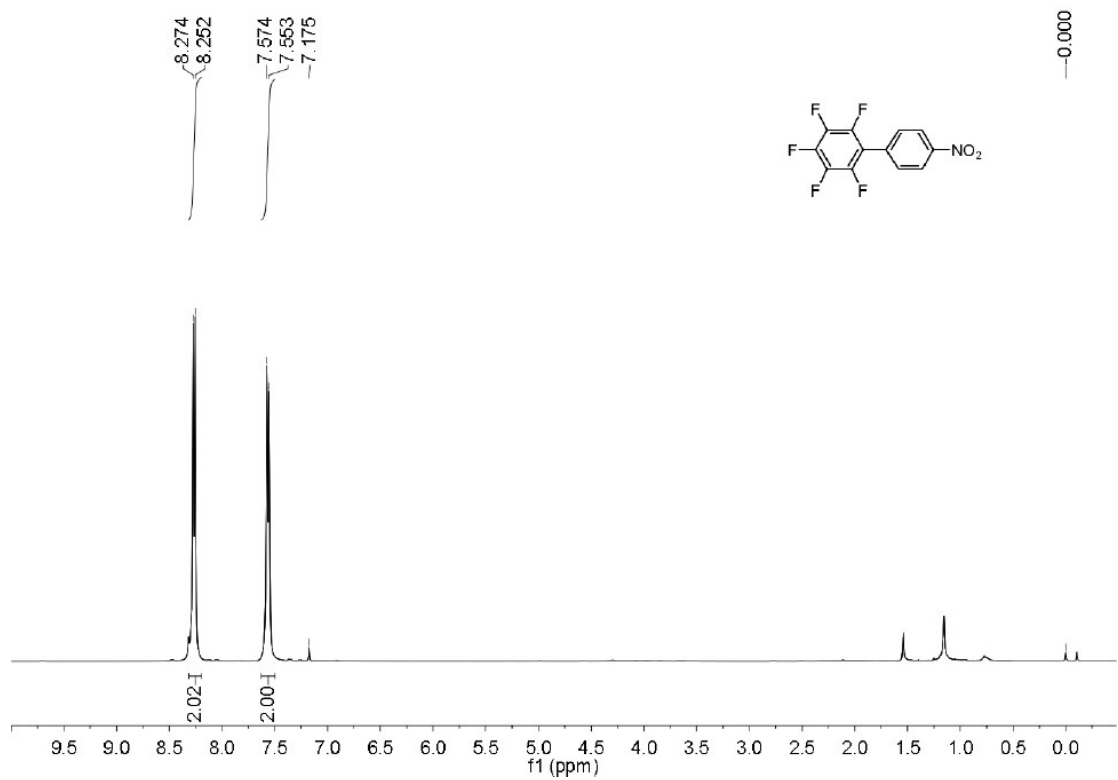

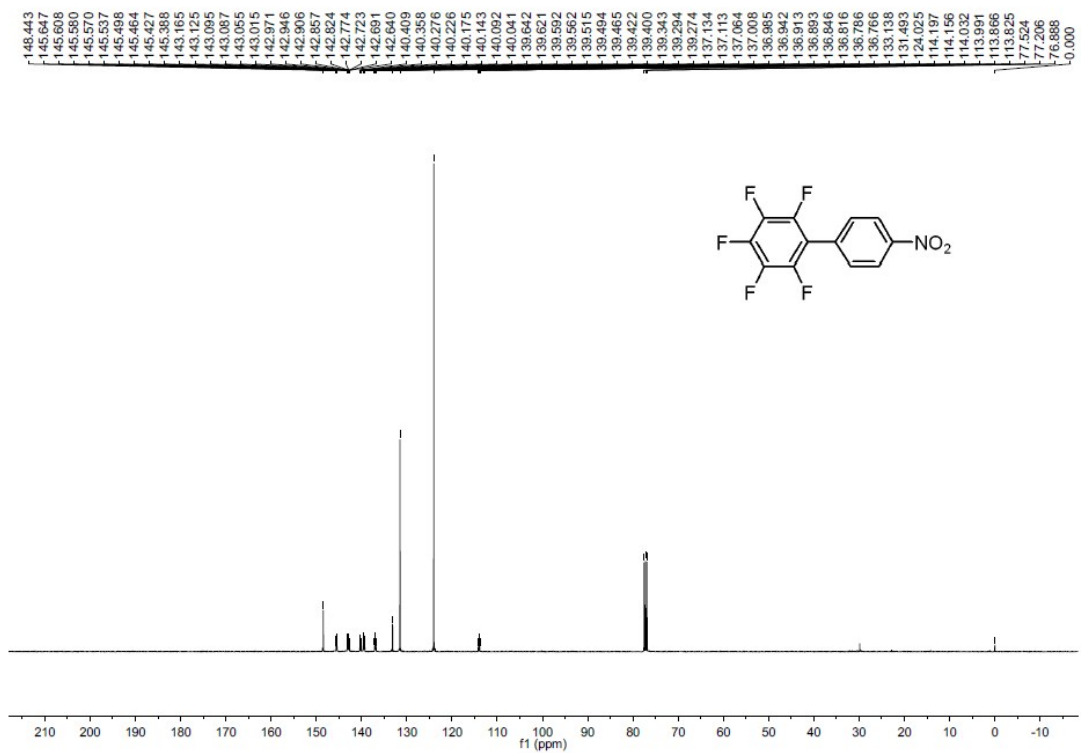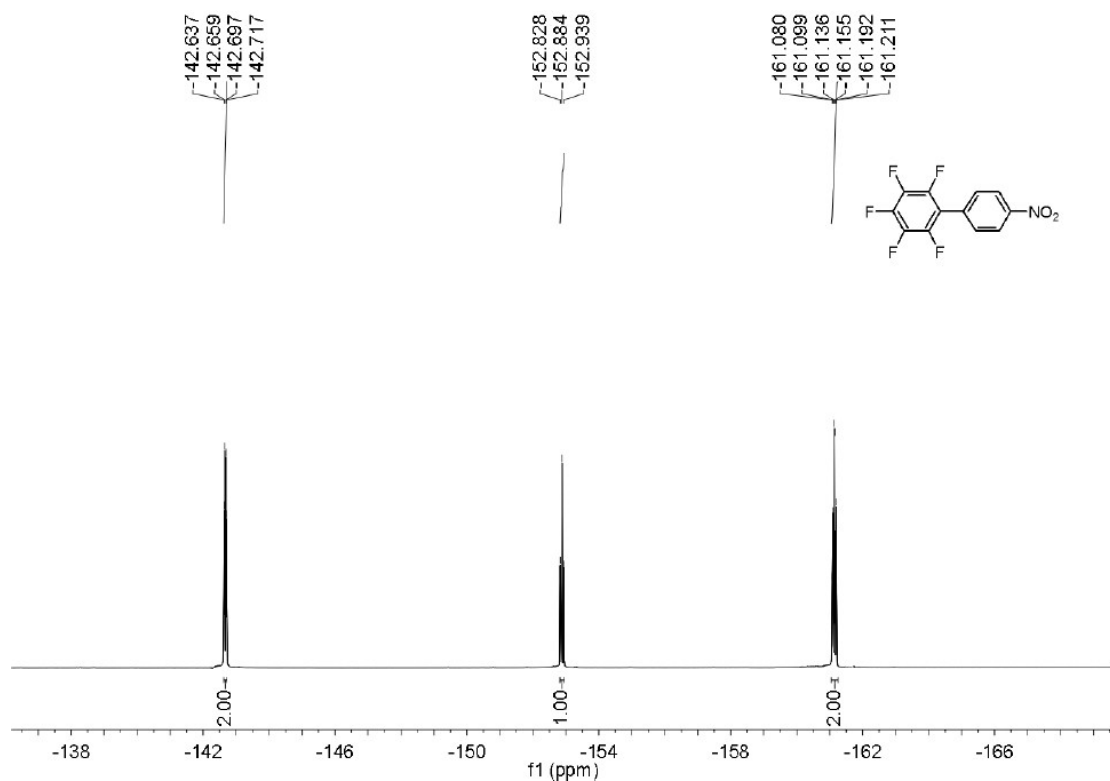

<sup>1</sup>H NMR, <sup>13</sup>C NMR and <sup>19</sup>F NMR spectra of **3b**

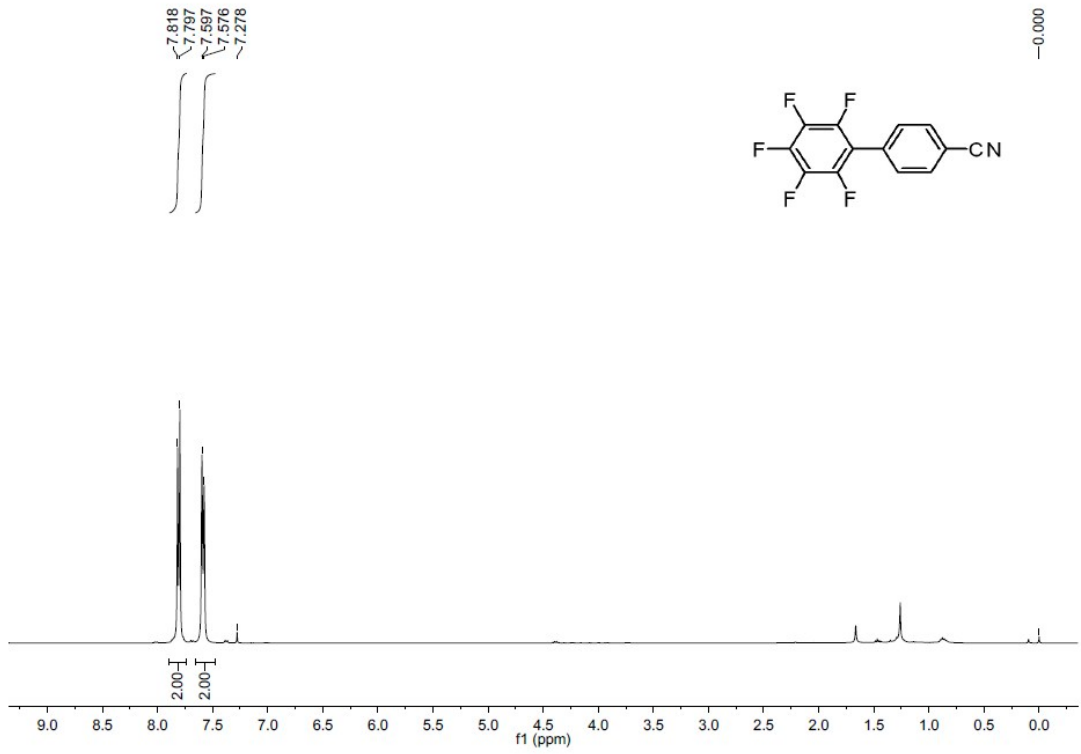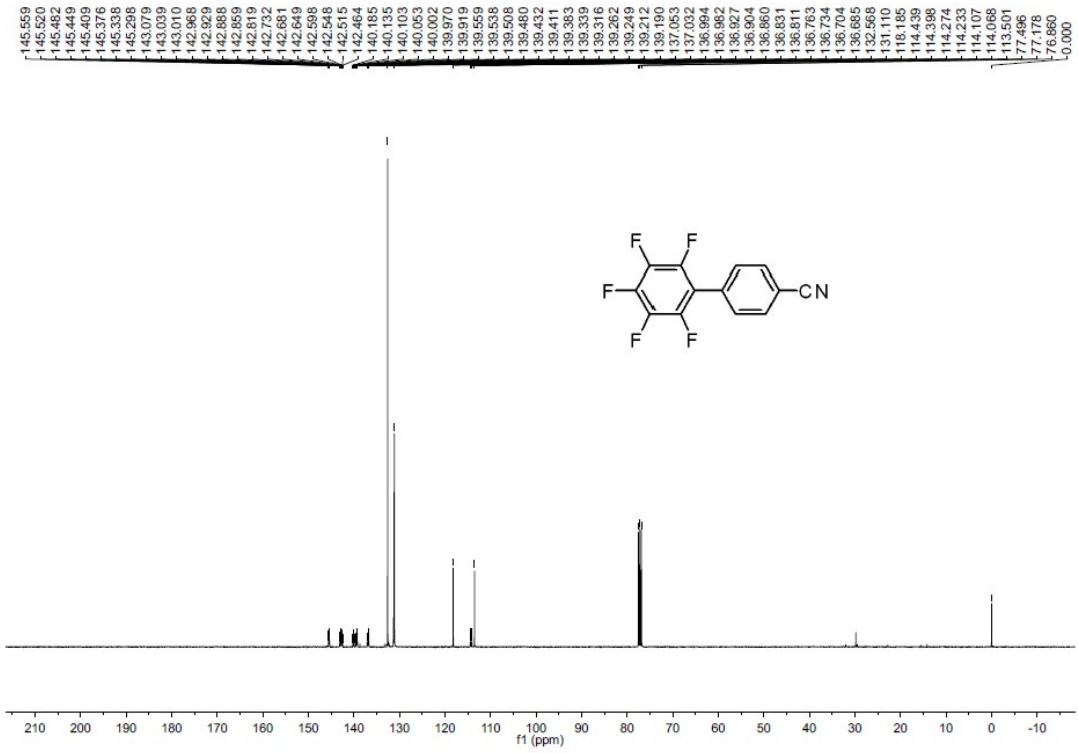

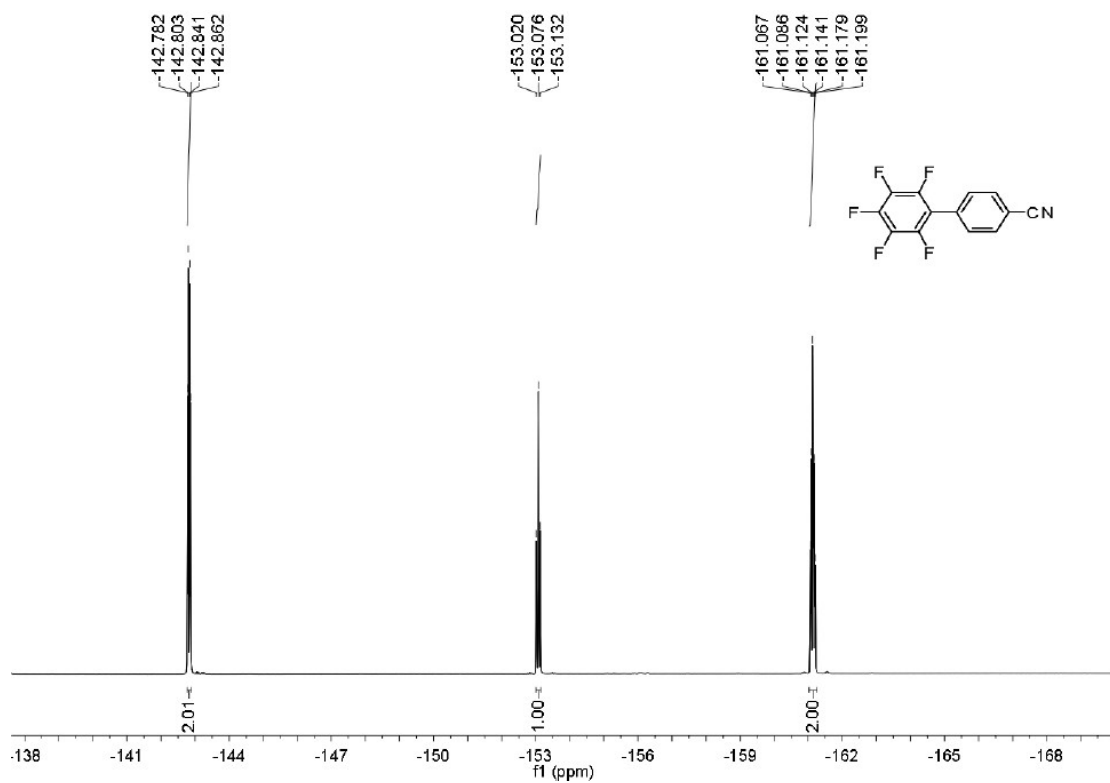

$^1\text{H}$  NMR,  $^{13}\text{C}$  NMR and  $^{19}\text{F}$  NMR spectra of **3c**

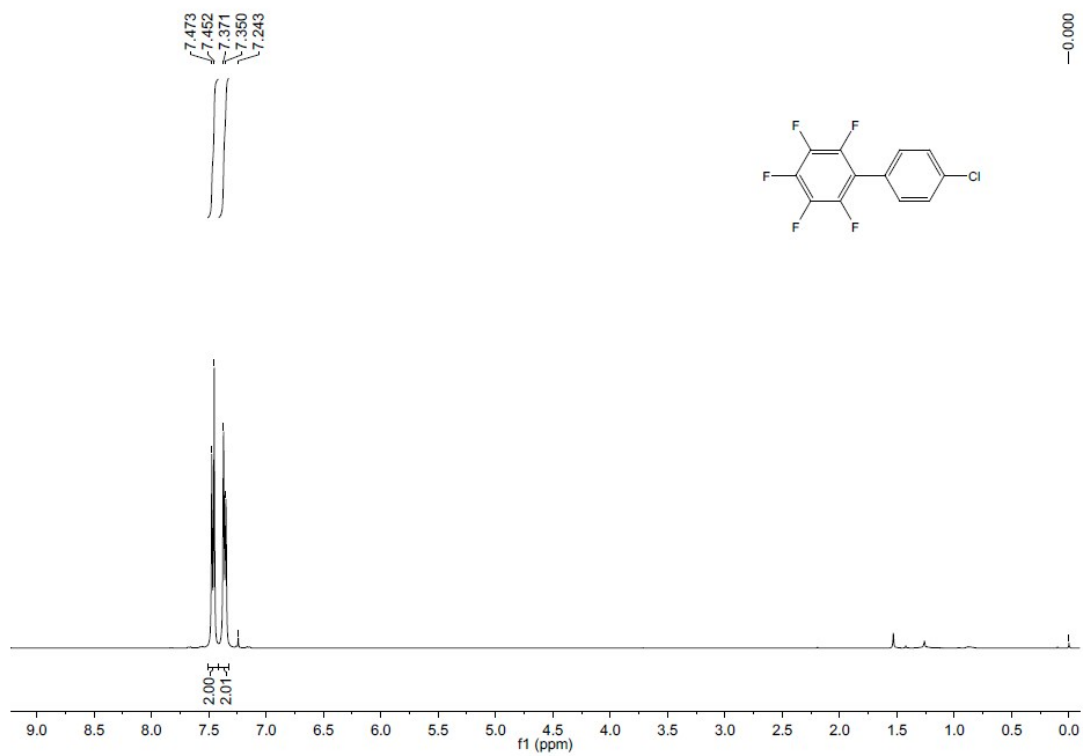



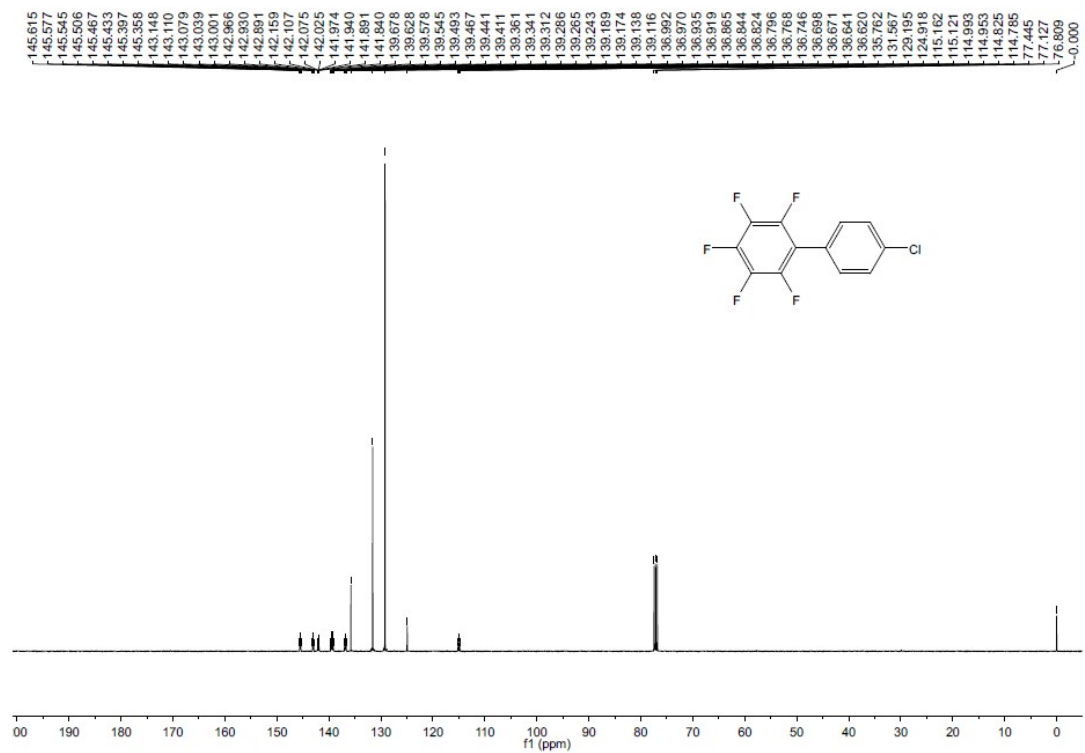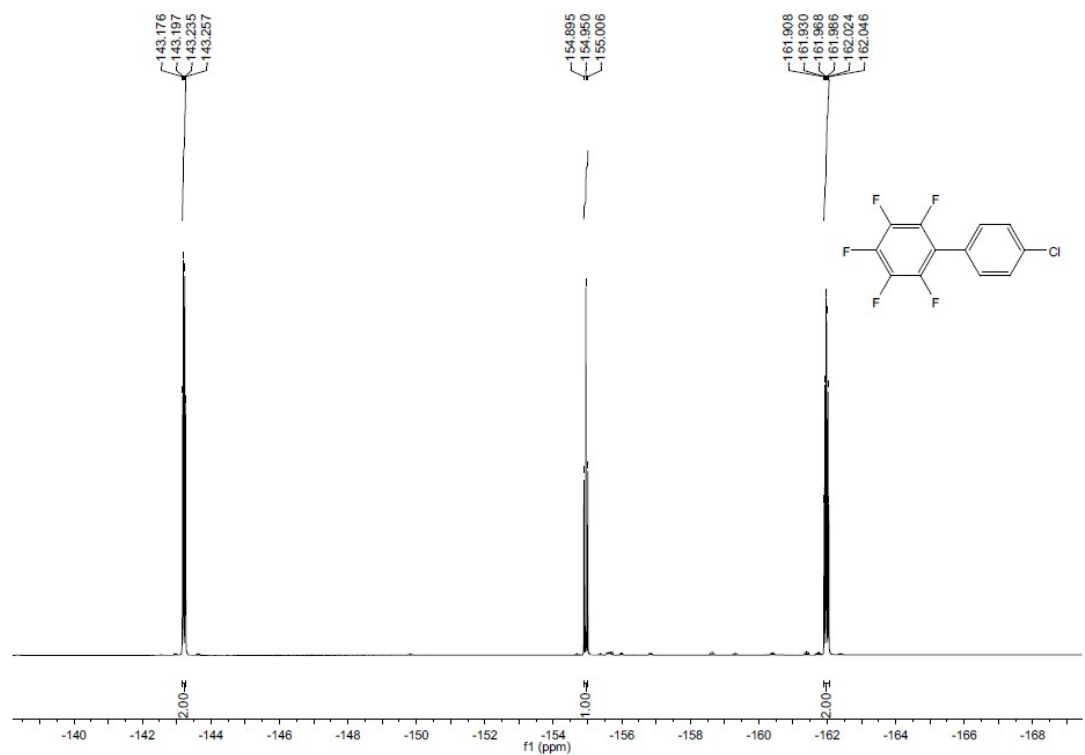

$^1\text{H}$  NMR,  $^{13}\text{C}$  NMR and  $^{19}\text{F}$  NMR spectra of **3d**

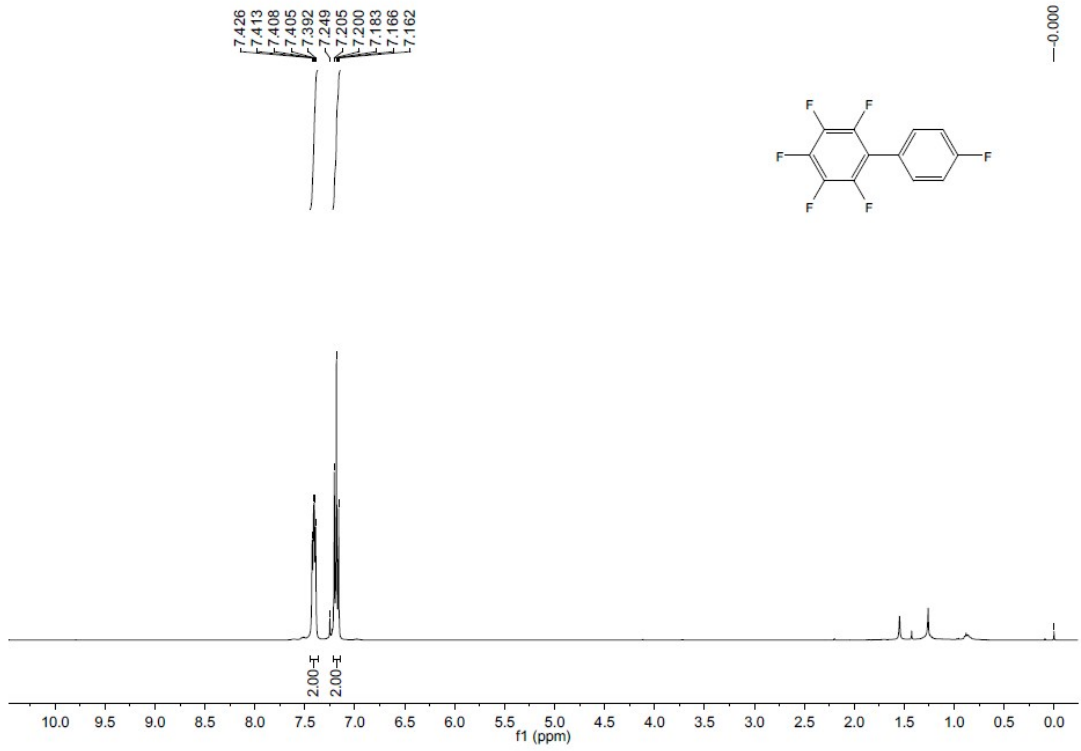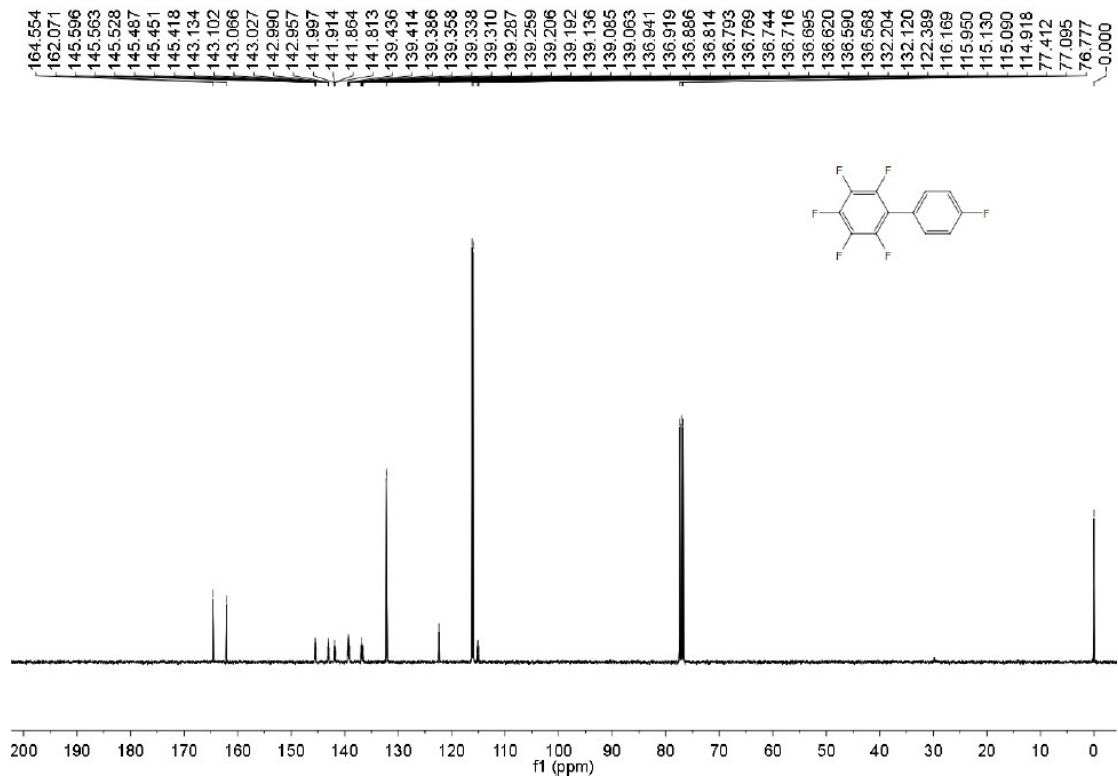

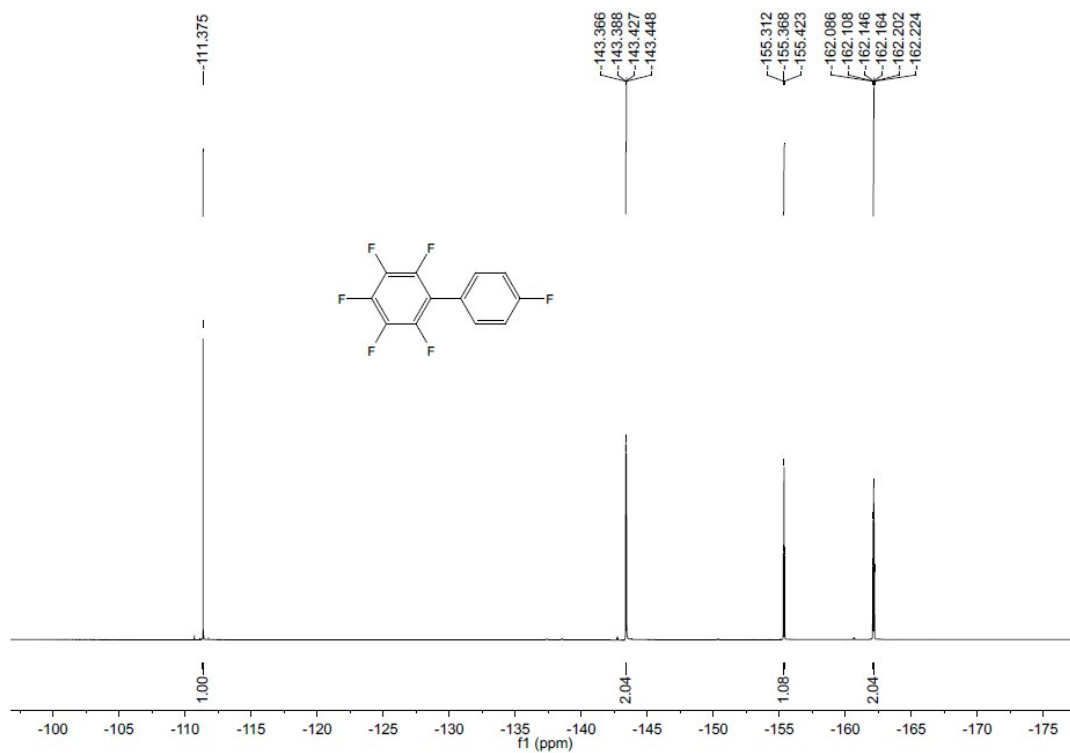

$^1\text{H}$  NMR,  $^{13}\text{C}$  NMR and  $^{19}\text{F}$  NMR spectra of **3e**

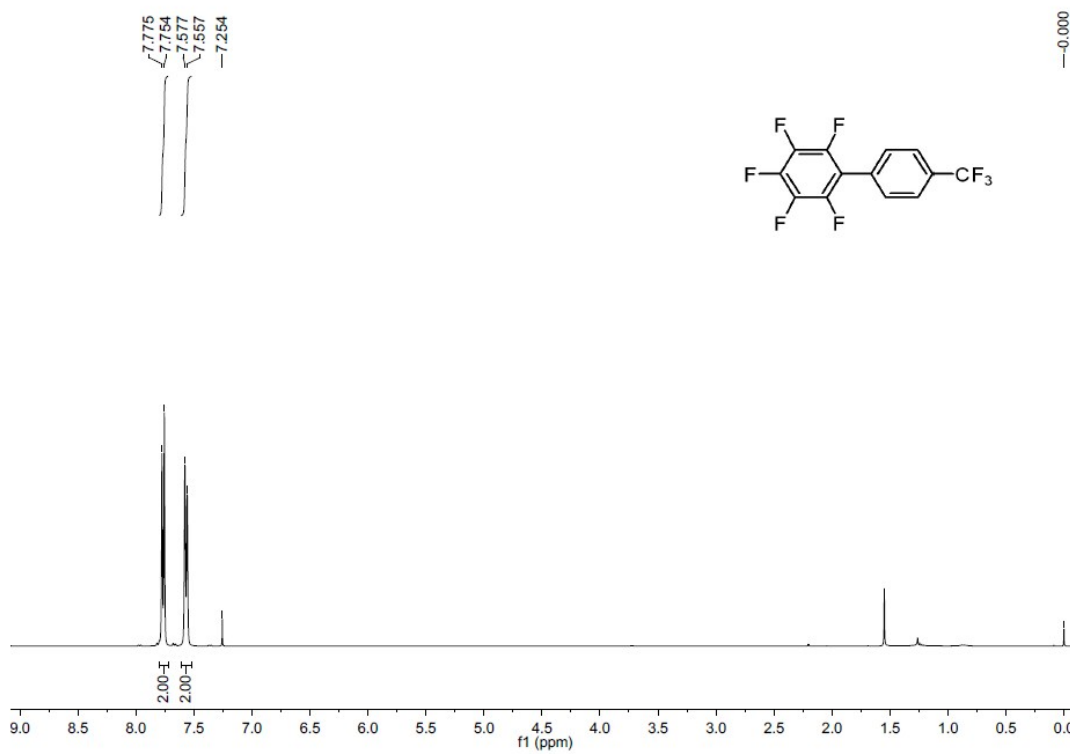

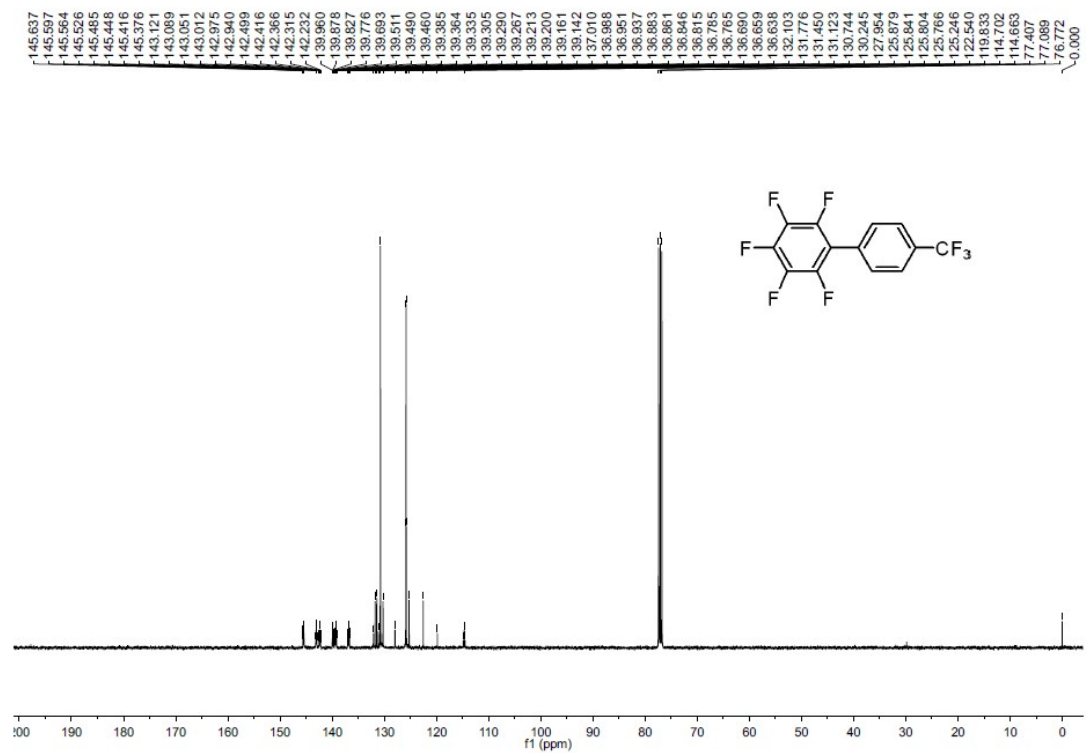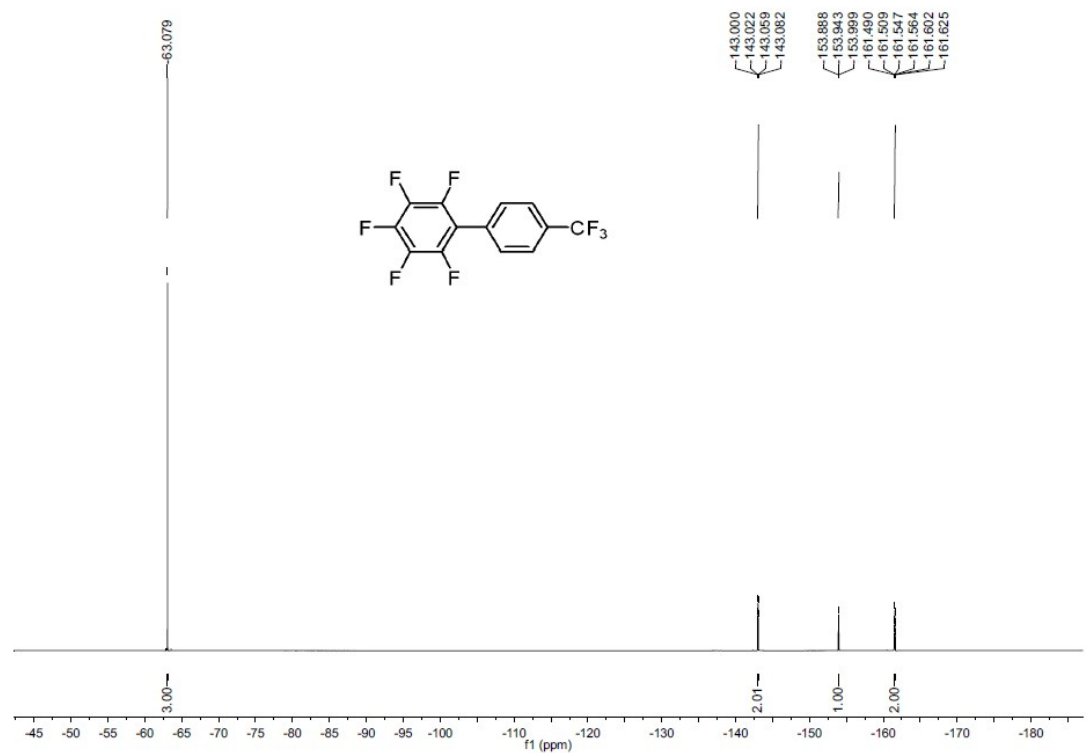

<sup>1</sup>H NMR, <sup>13</sup>C NMR and <sup>19</sup>F NMR spectra of **3f**

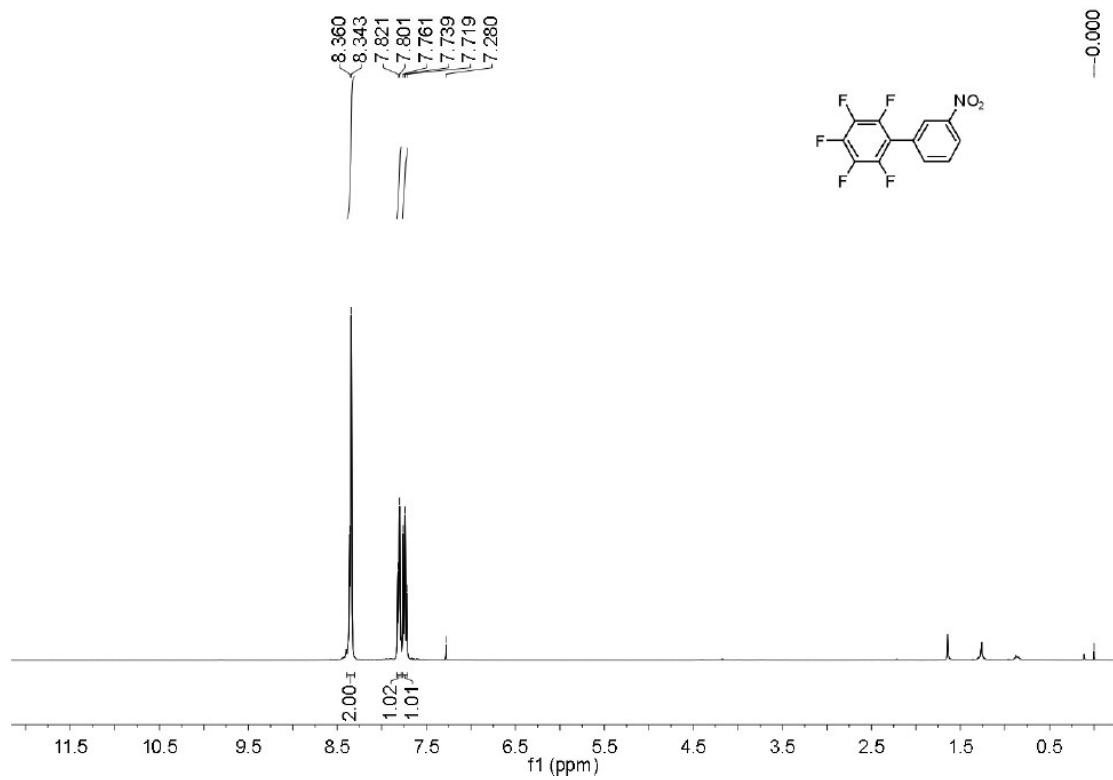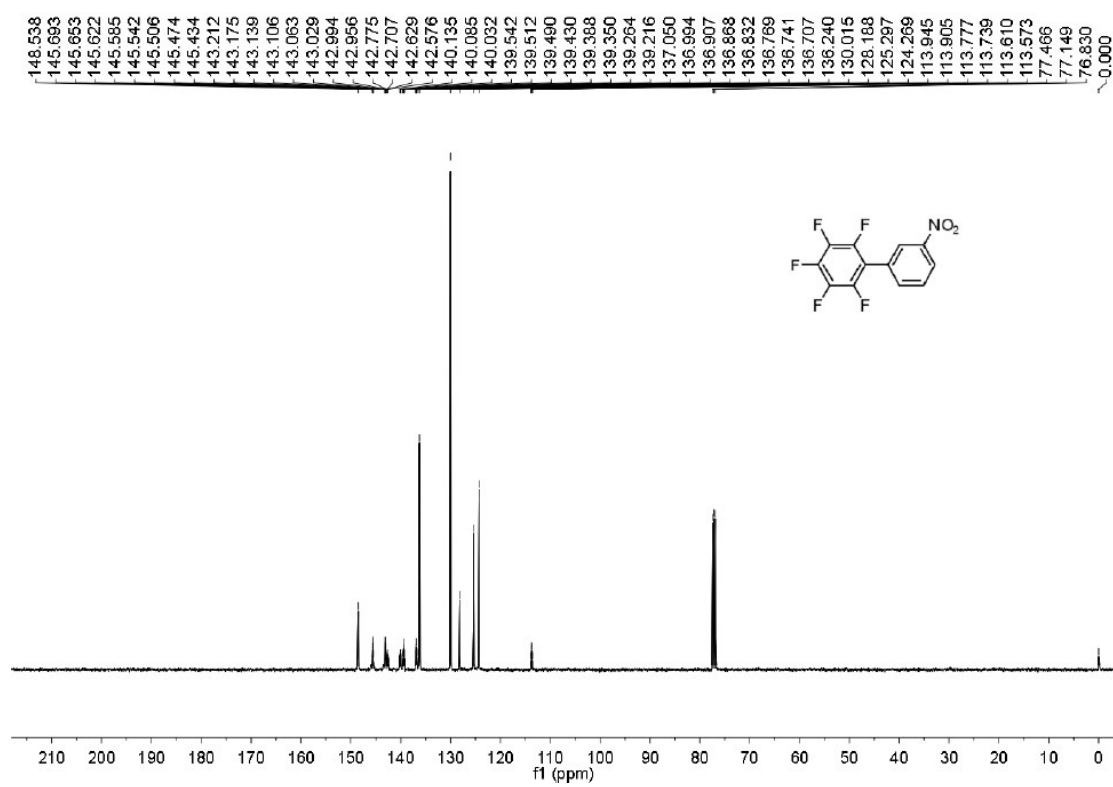

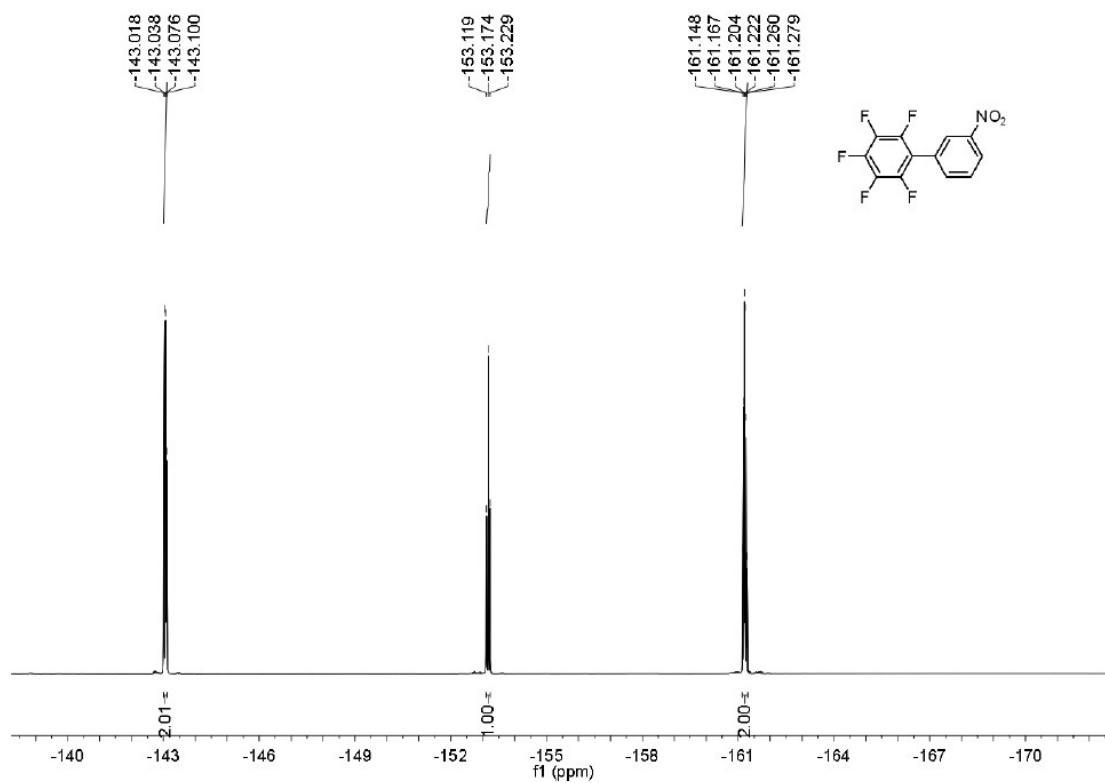

$^1\text{H}$  NMR,  $^{13}\text{C}$  NMR and  $^{19}\text{F}$  NMR spectra of **3g**

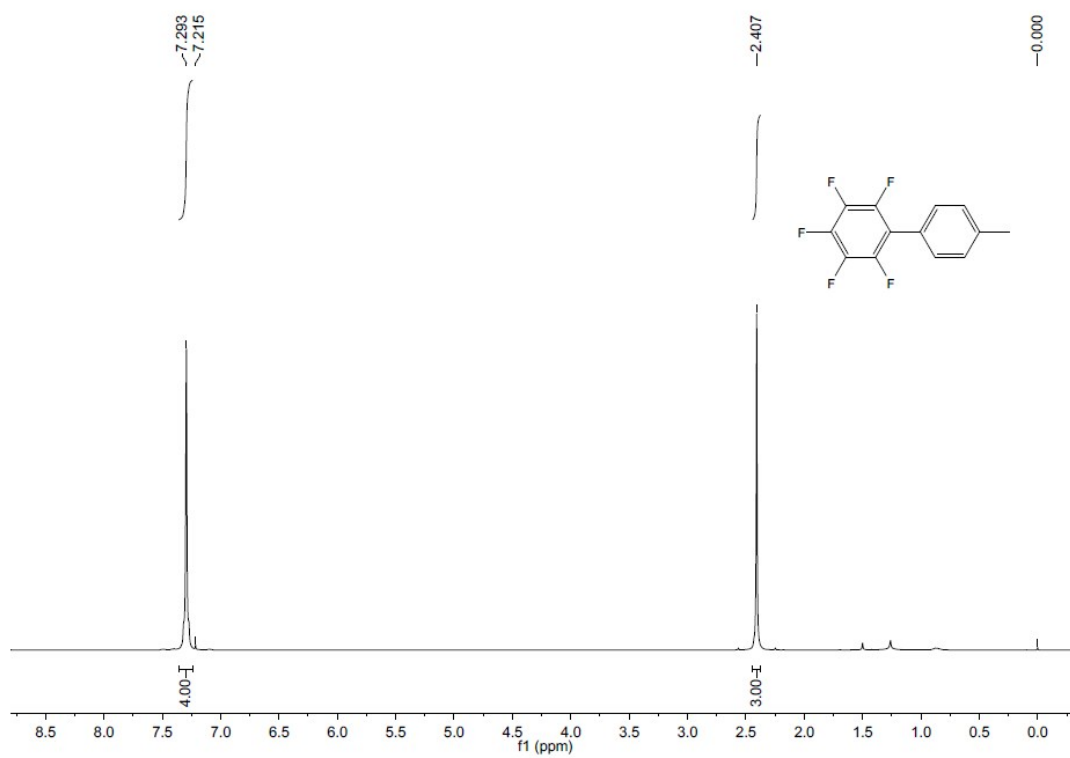

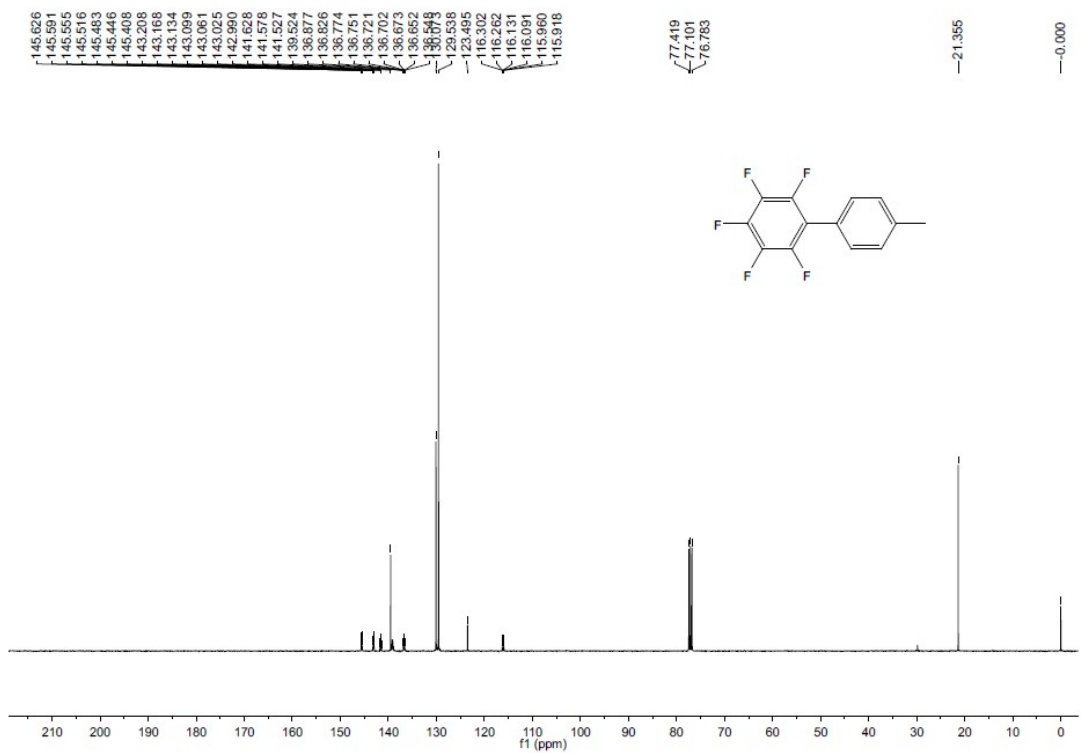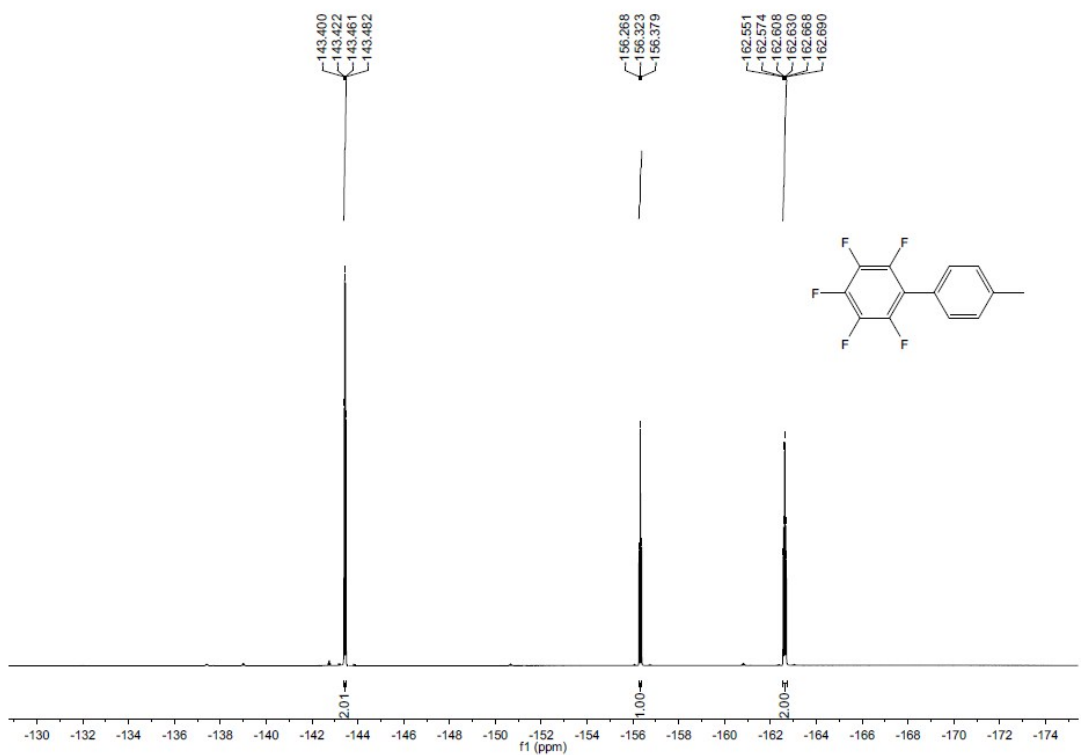

<sup>1</sup>H NMR, <sup>13</sup>C NMR and <sup>19</sup>F NMR spectra of **3h**

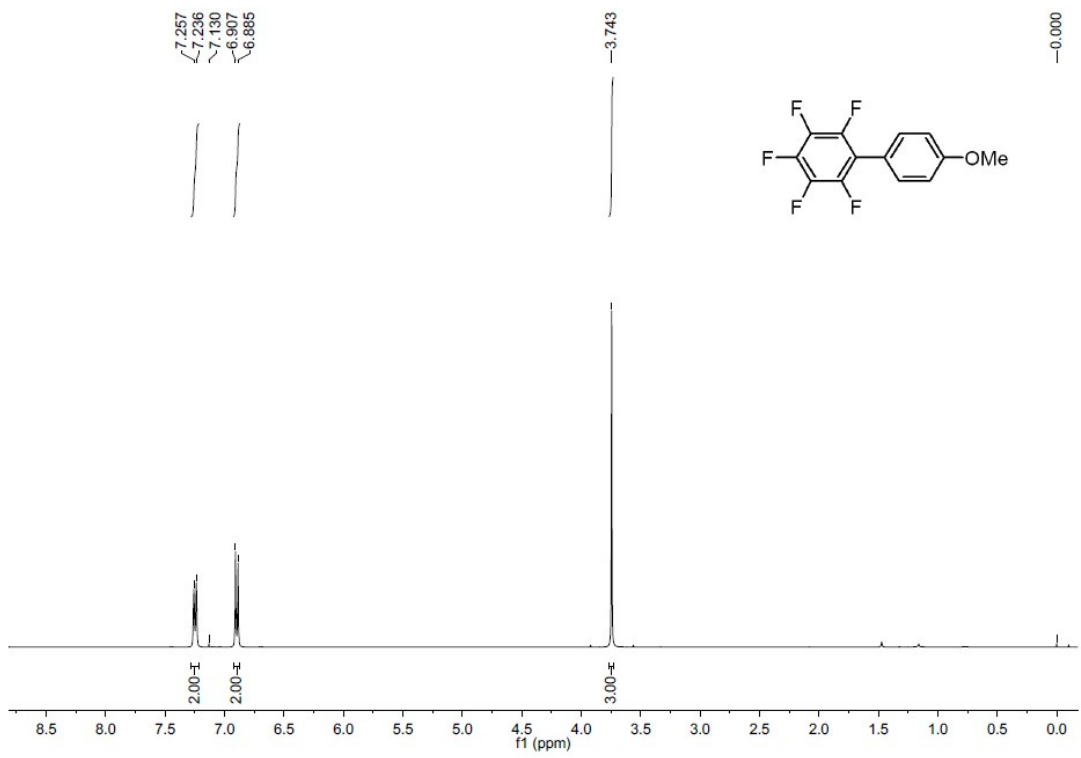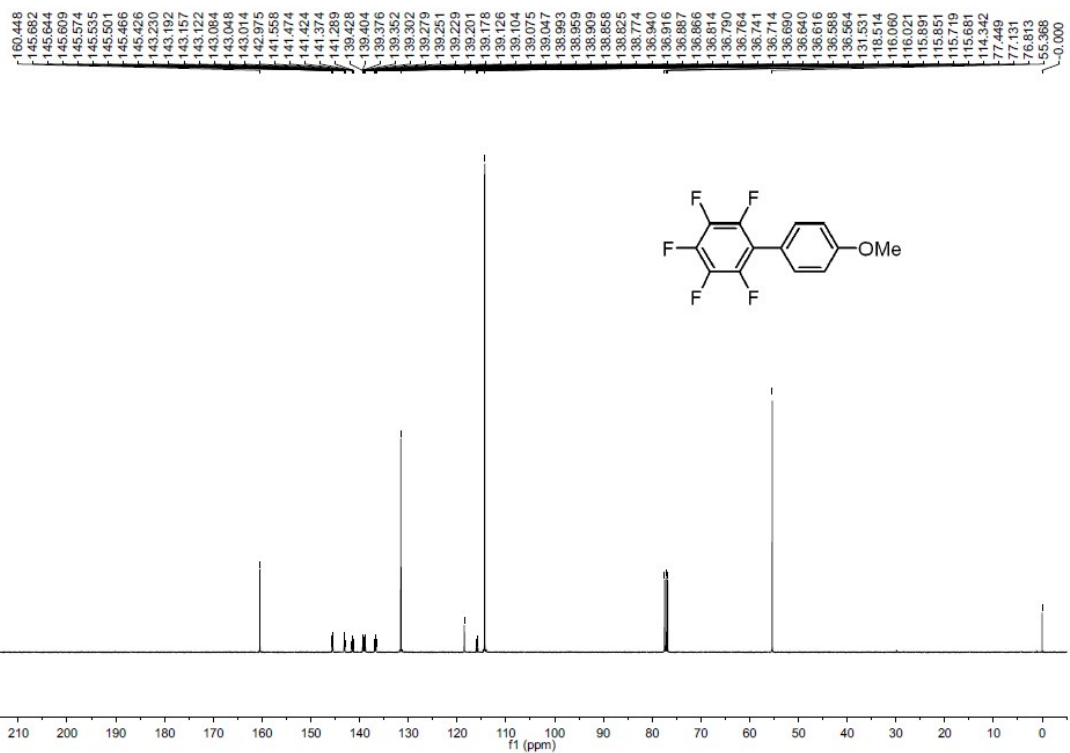



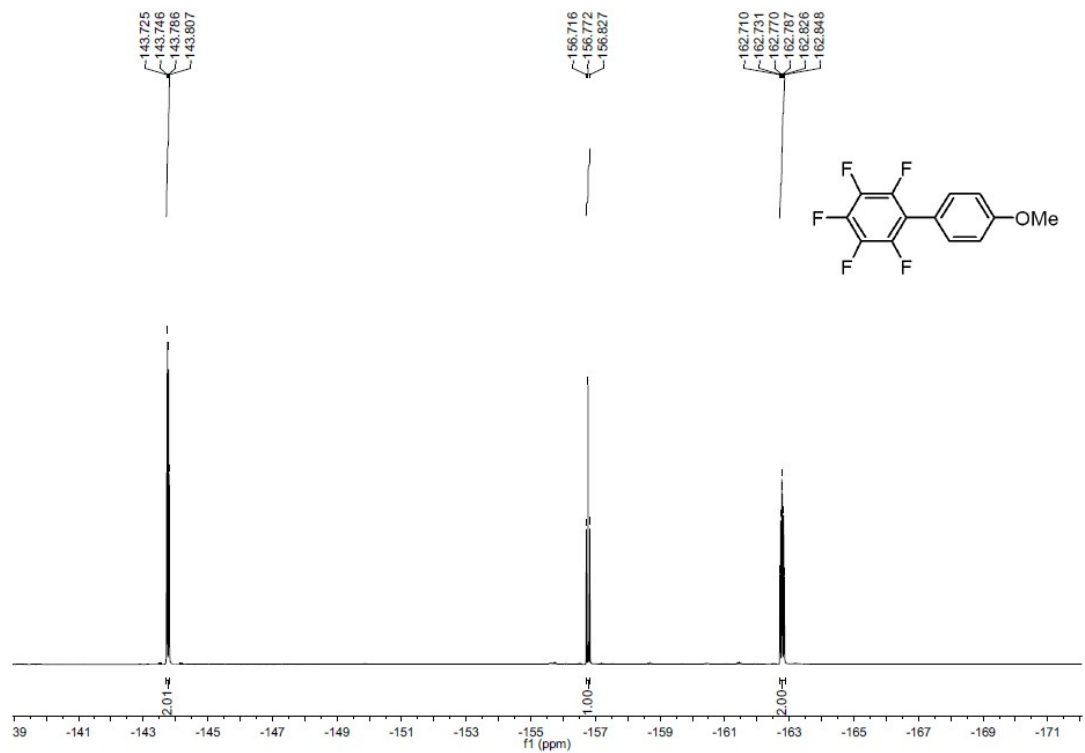

$^1\text{H}$  NMR,  $^{13}\text{C}$  NMR and  $^{19}\text{F}$  NMR spectra of **3i**

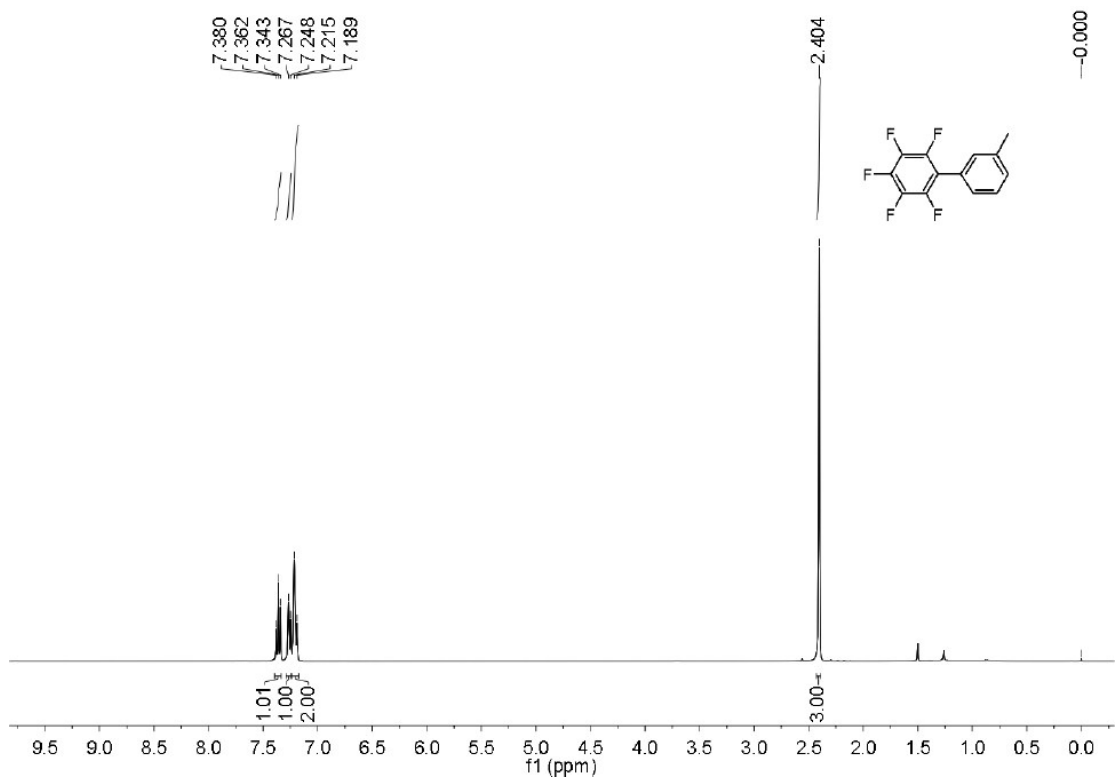

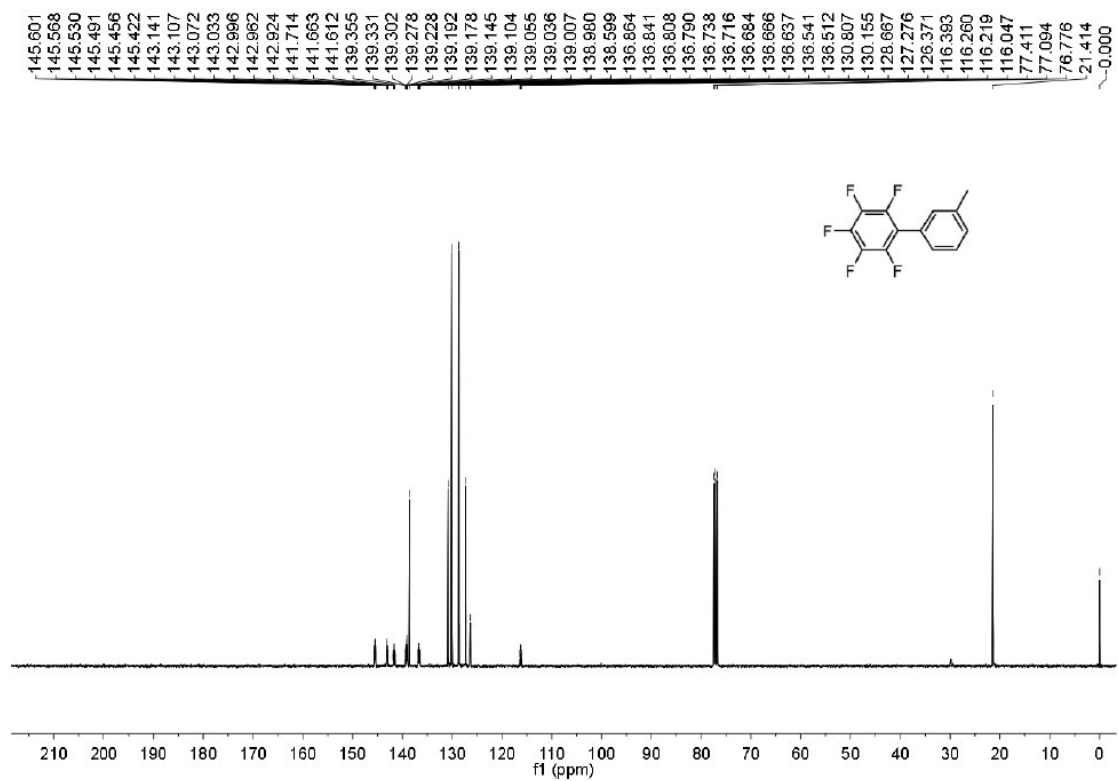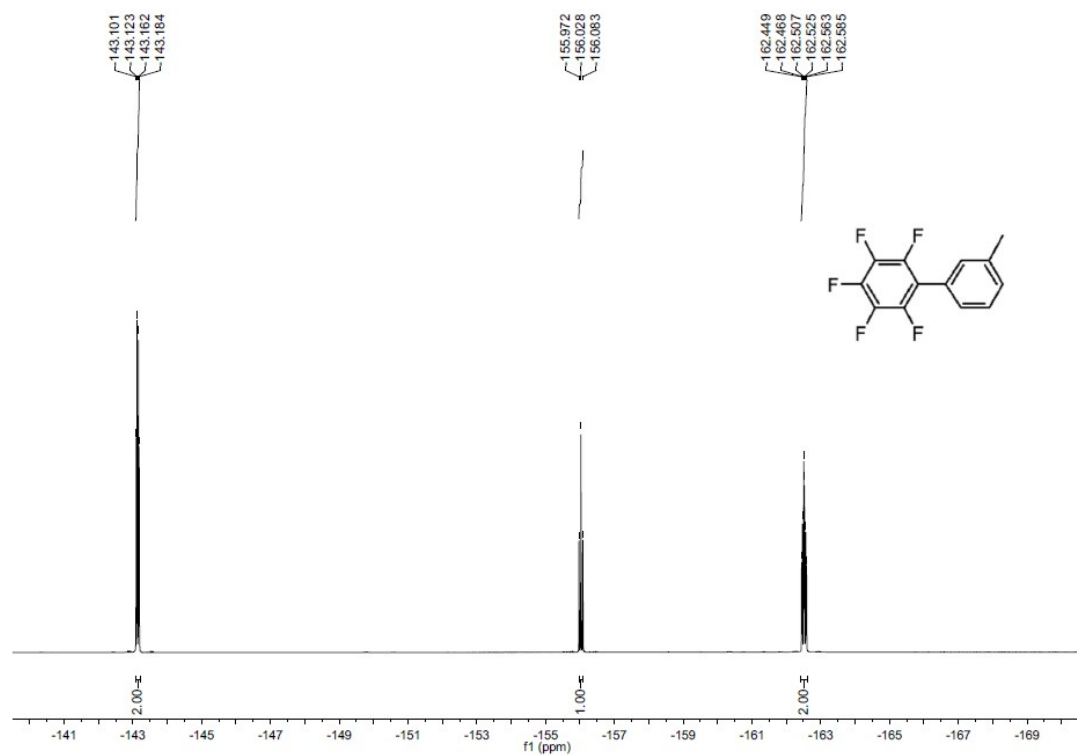

<sup>1</sup>H NMR, <sup>13</sup>C NMR and <sup>19</sup>F NMR spectra of **3j**

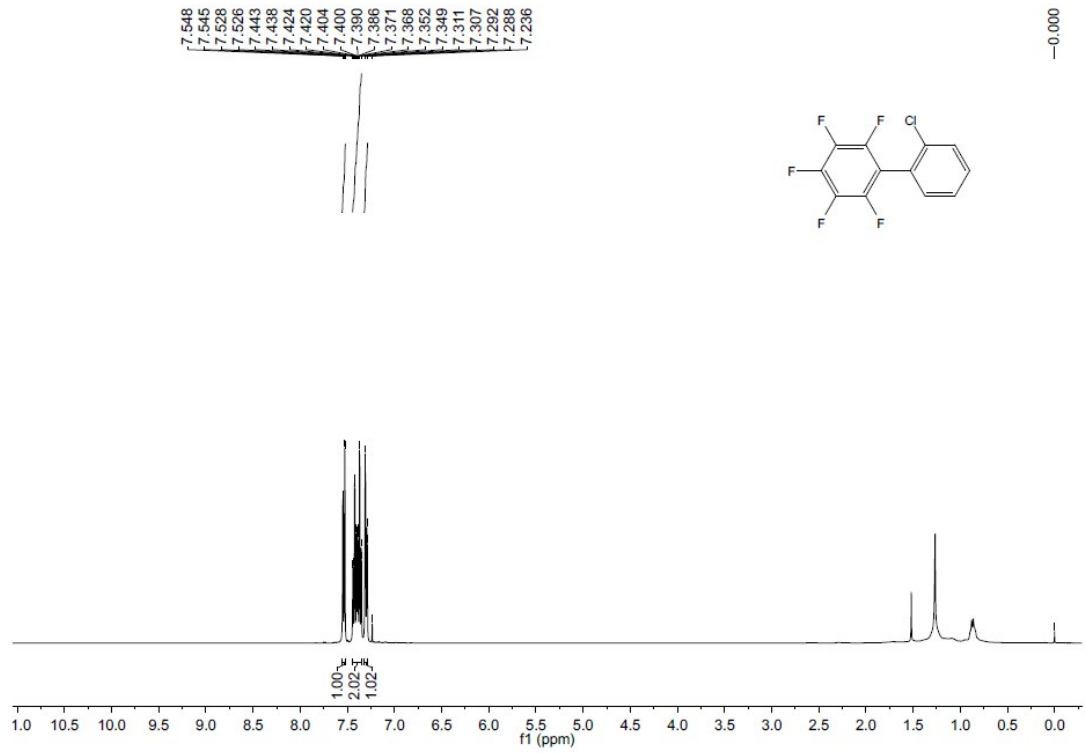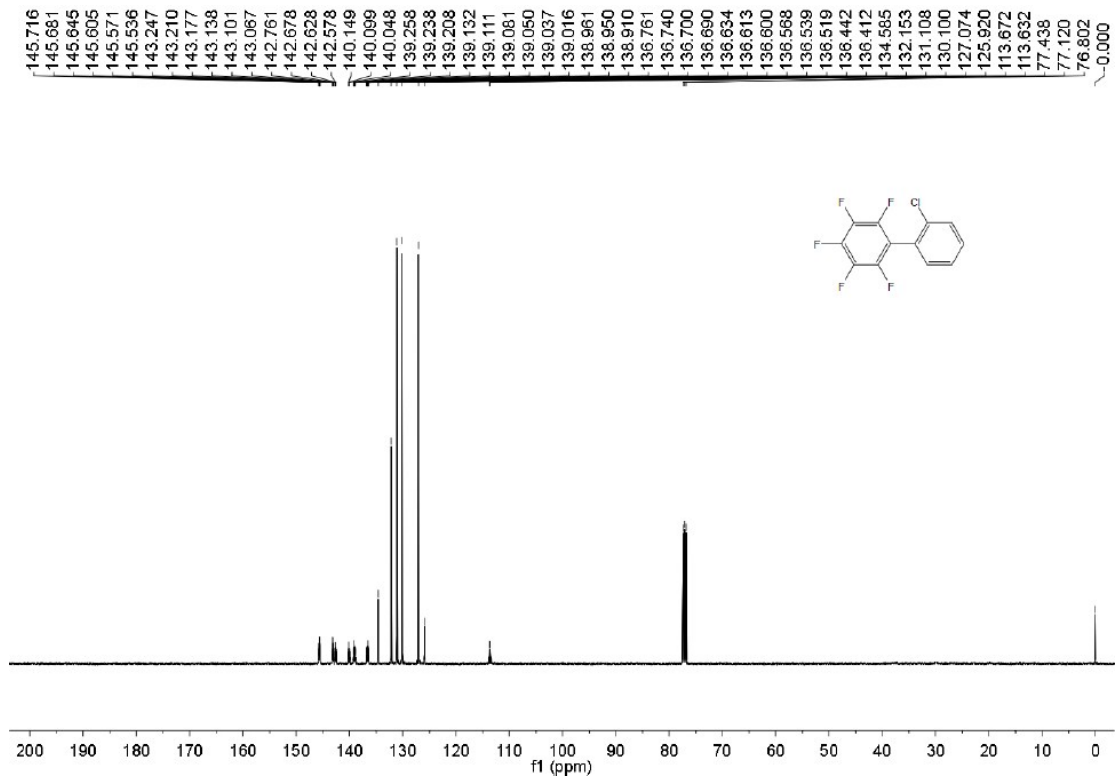

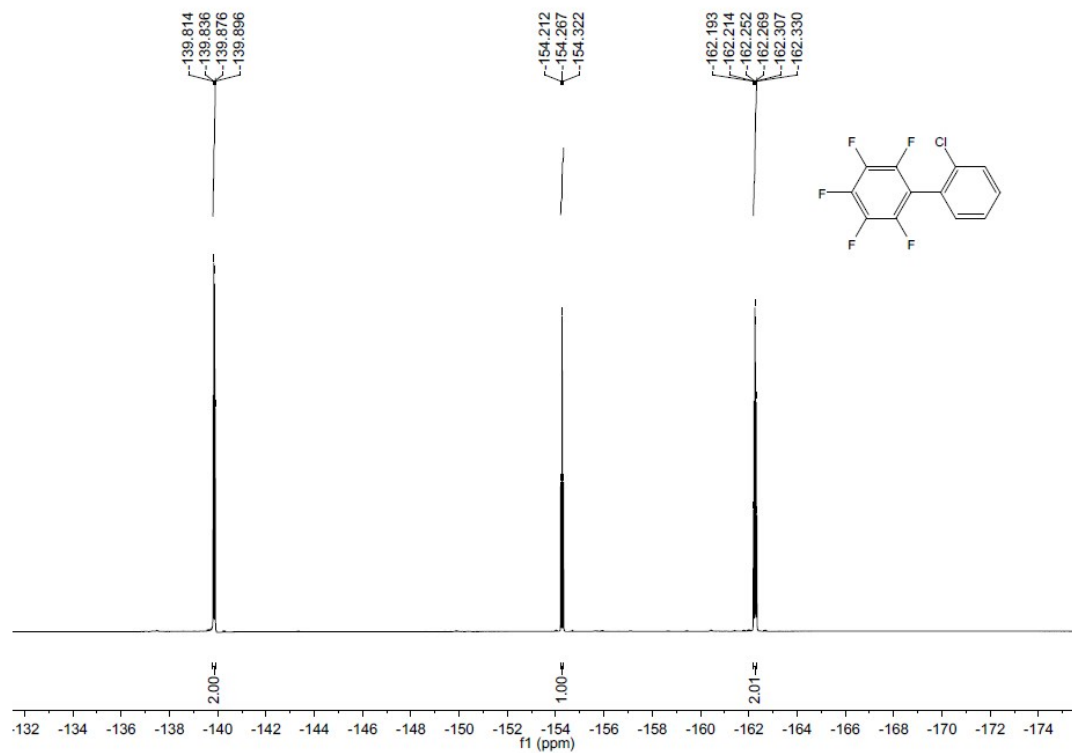

$^1\text{H}$  NMR,  $^{13}\text{C}$  NMR and  $^{19}\text{F}$  NMR spectra of **3k**

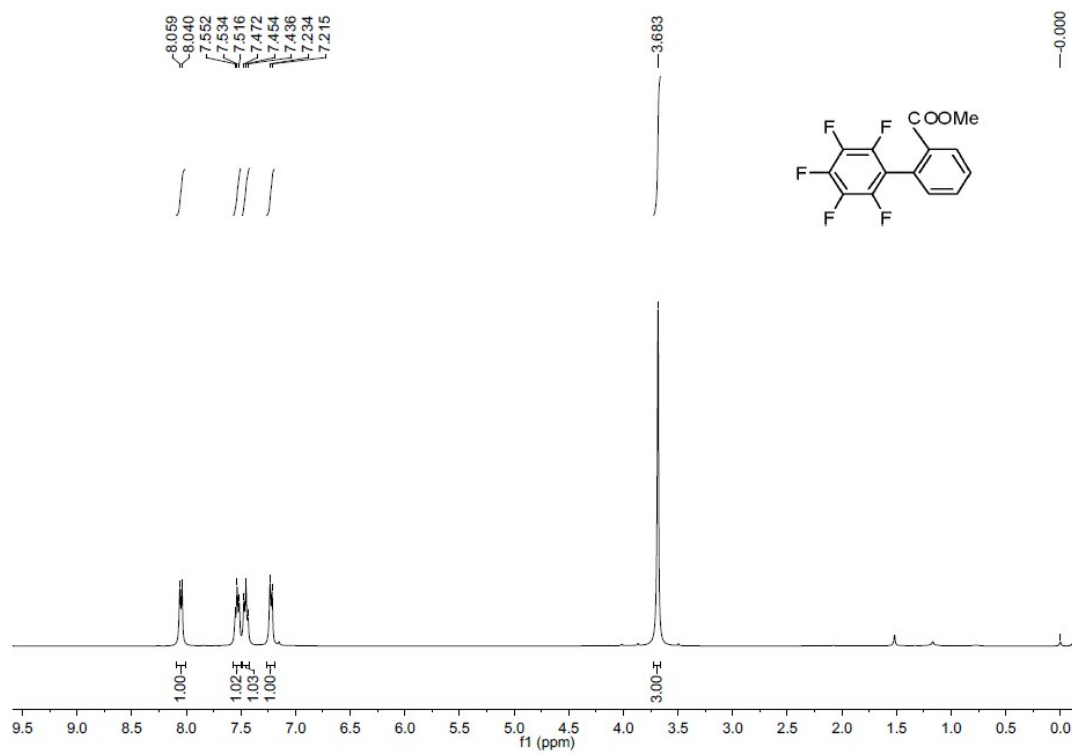

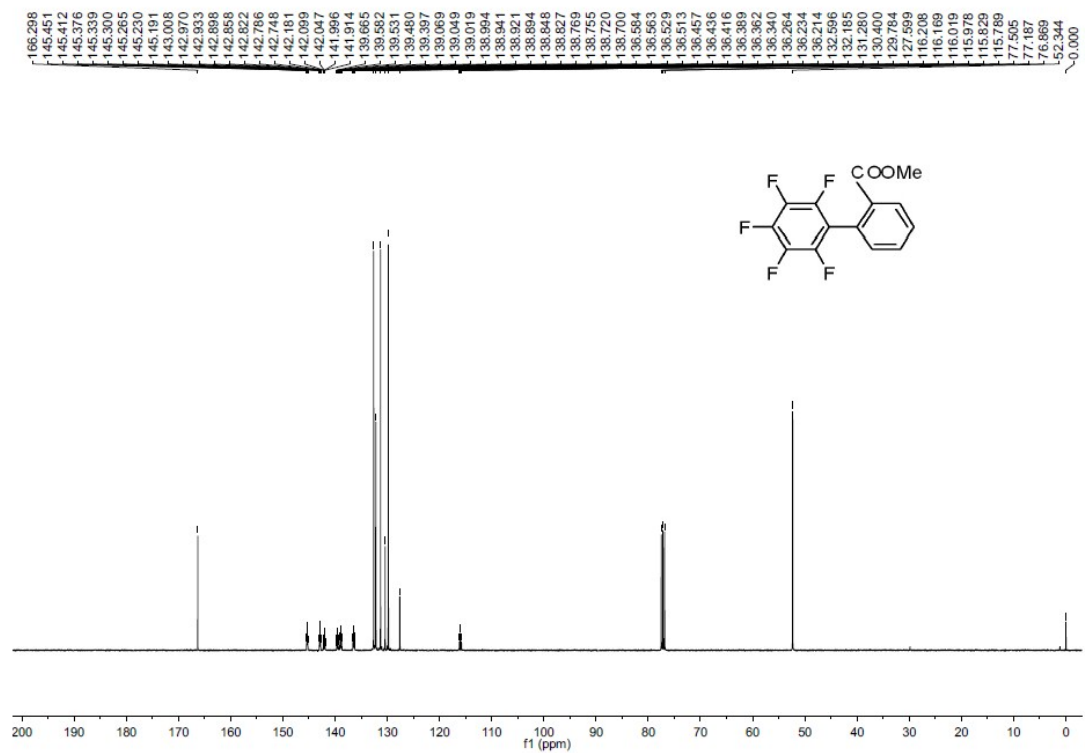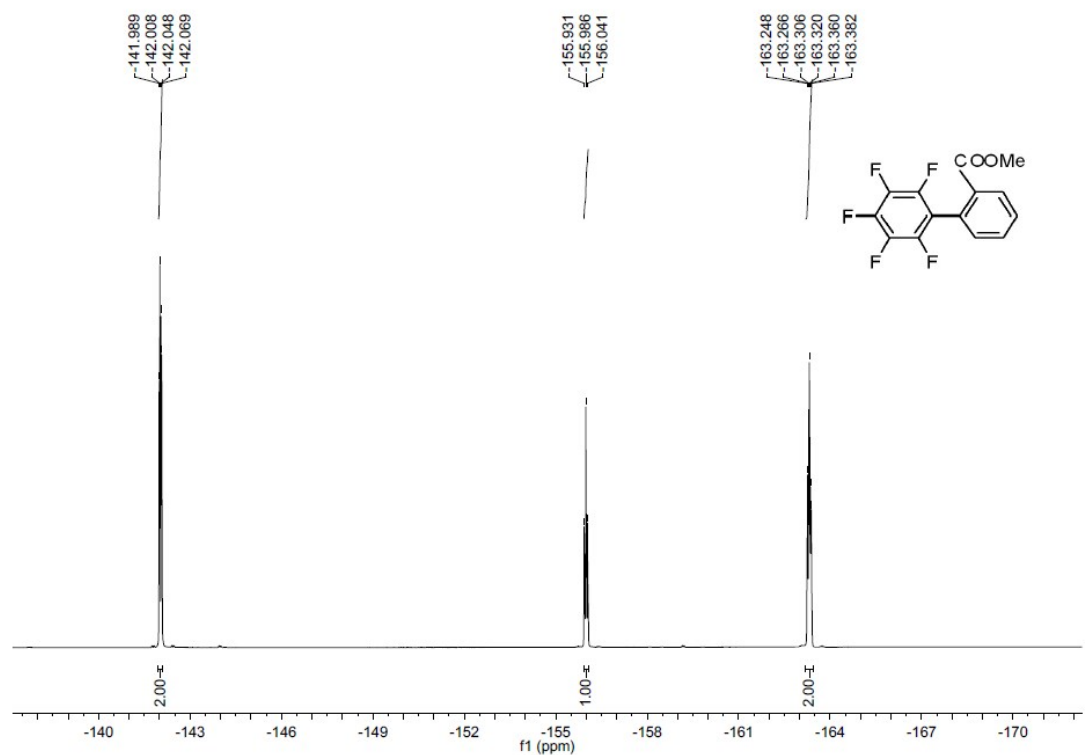

<sup>1</sup>H NMR, <sup>13</sup>C NMR and <sup>19</sup>F NMR spectra of **31**

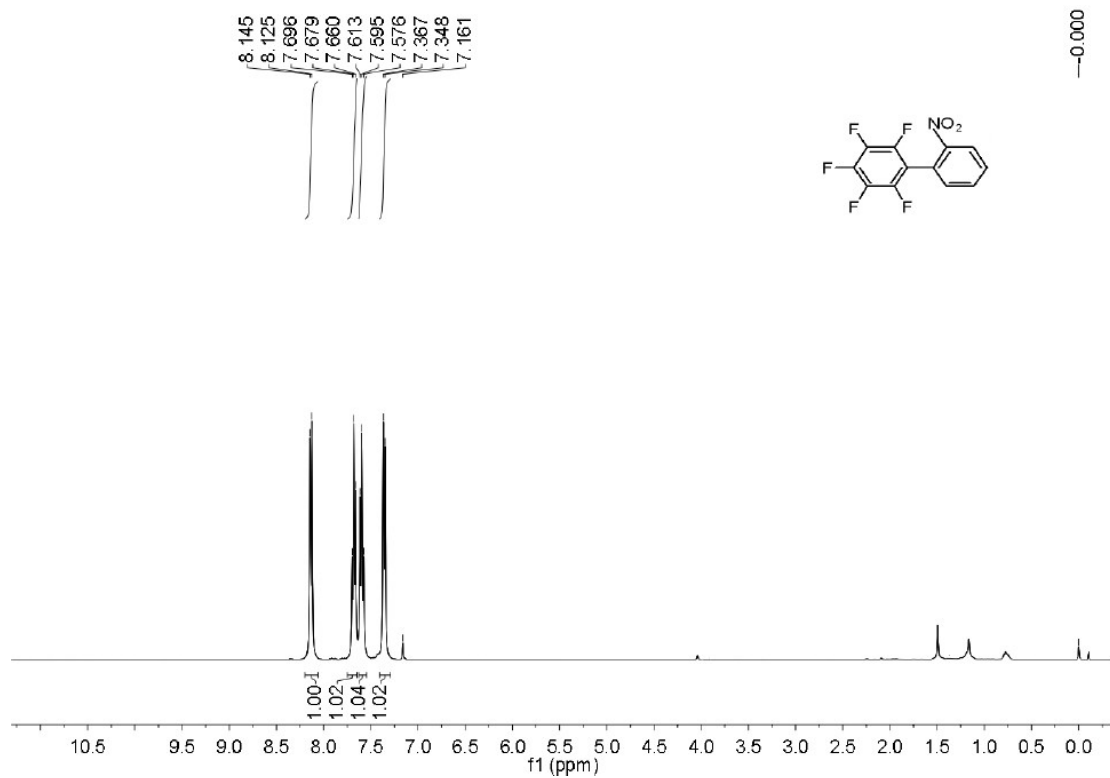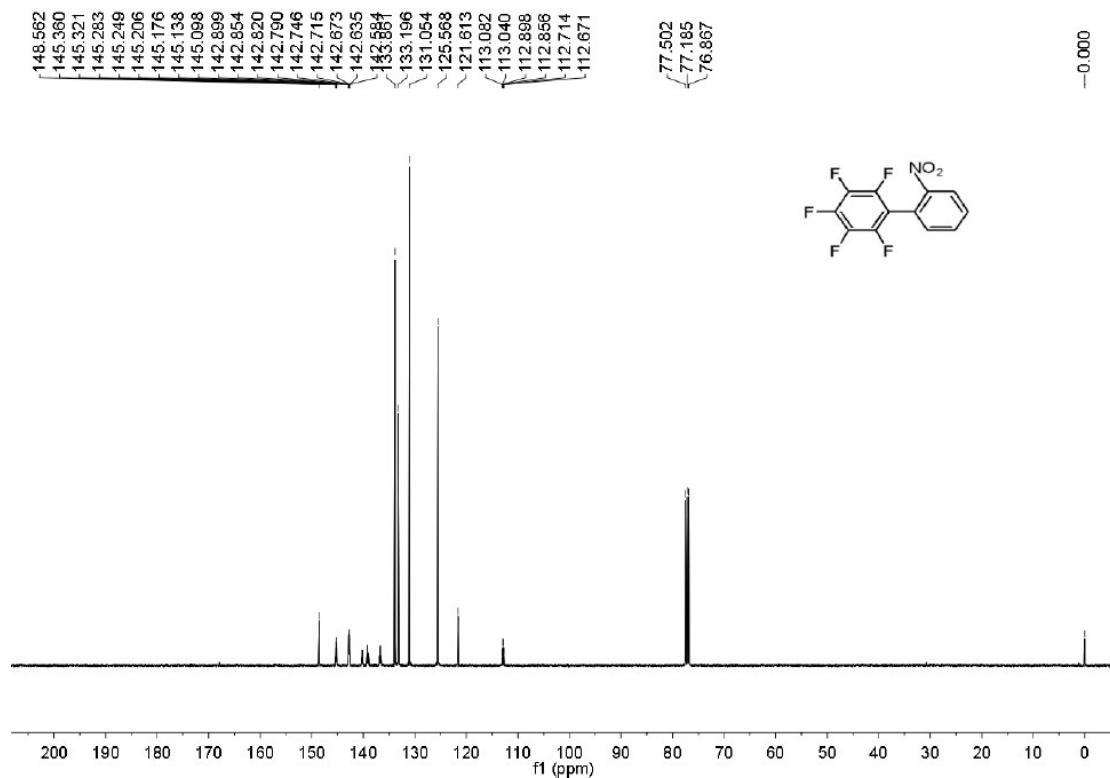

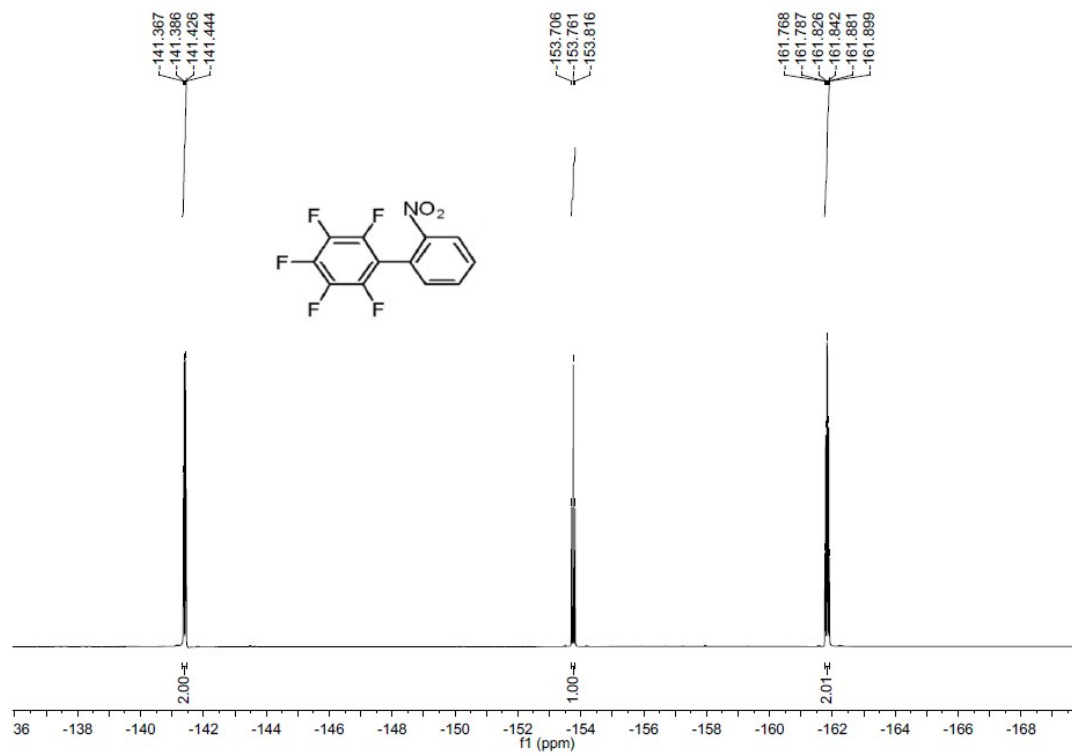

<sup>1</sup>H NMR, <sup>13</sup>C NMR and <sup>19</sup>F NMR spectra of **3m**

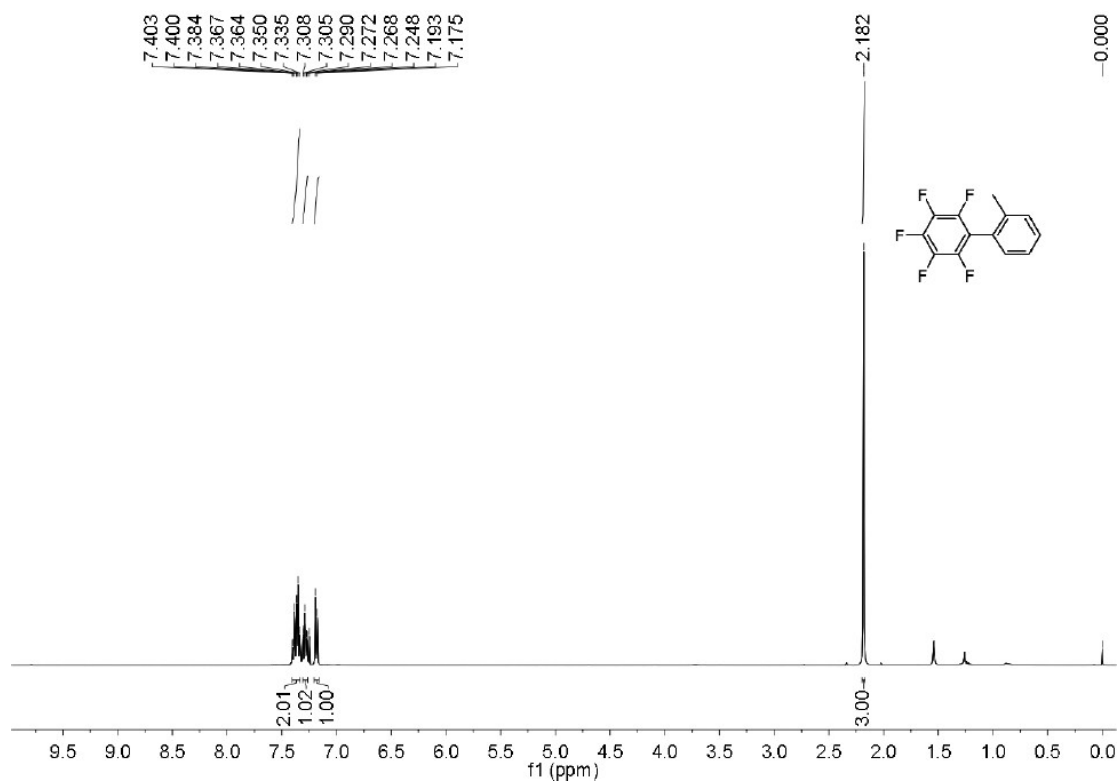

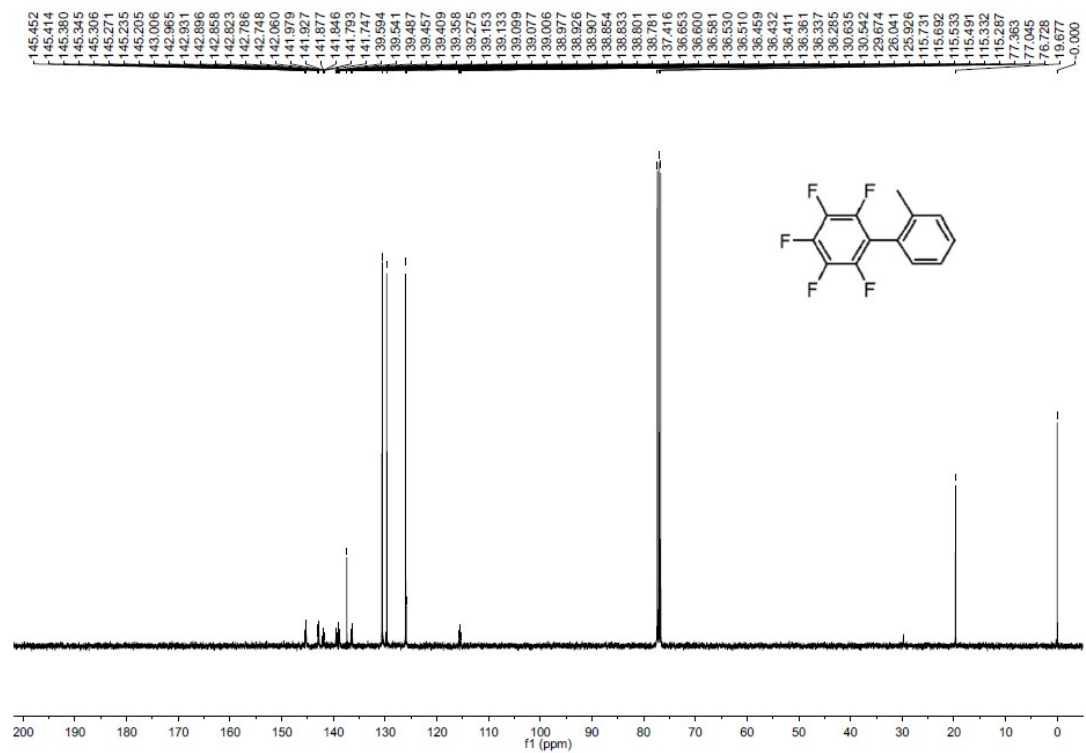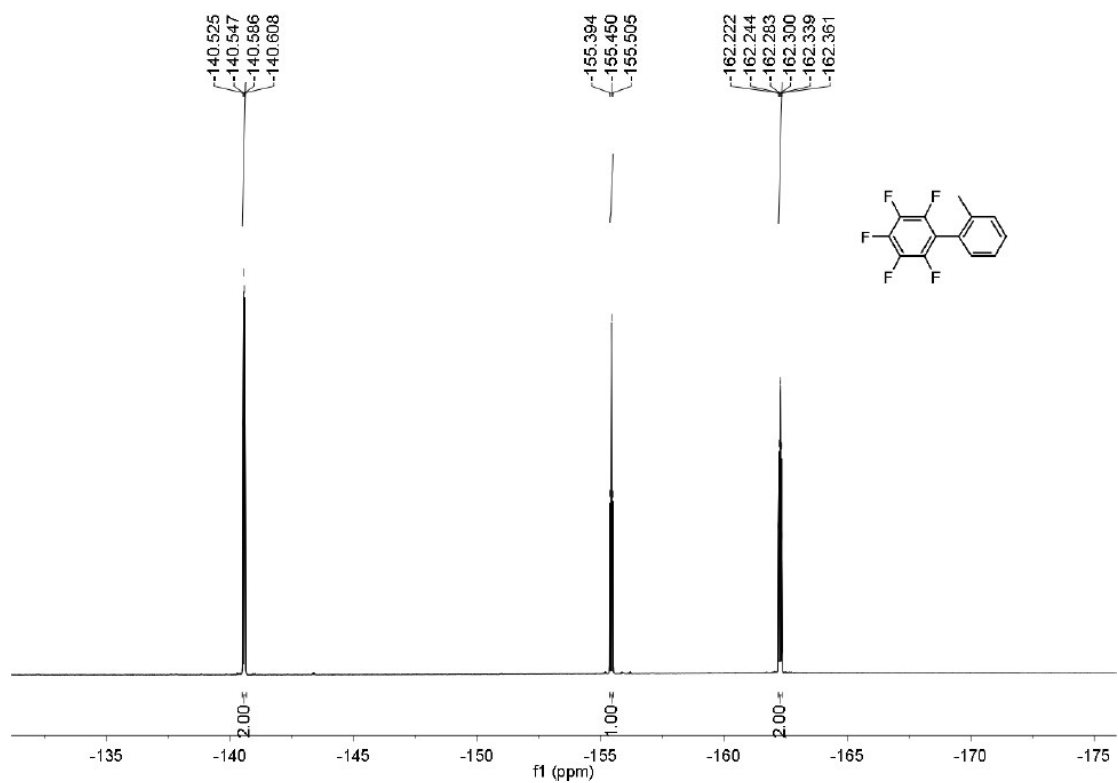

<sup>1</sup>H NMR, <sup>13</sup>C NMR and <sup>19</sup>F NMR spectra of **3n**



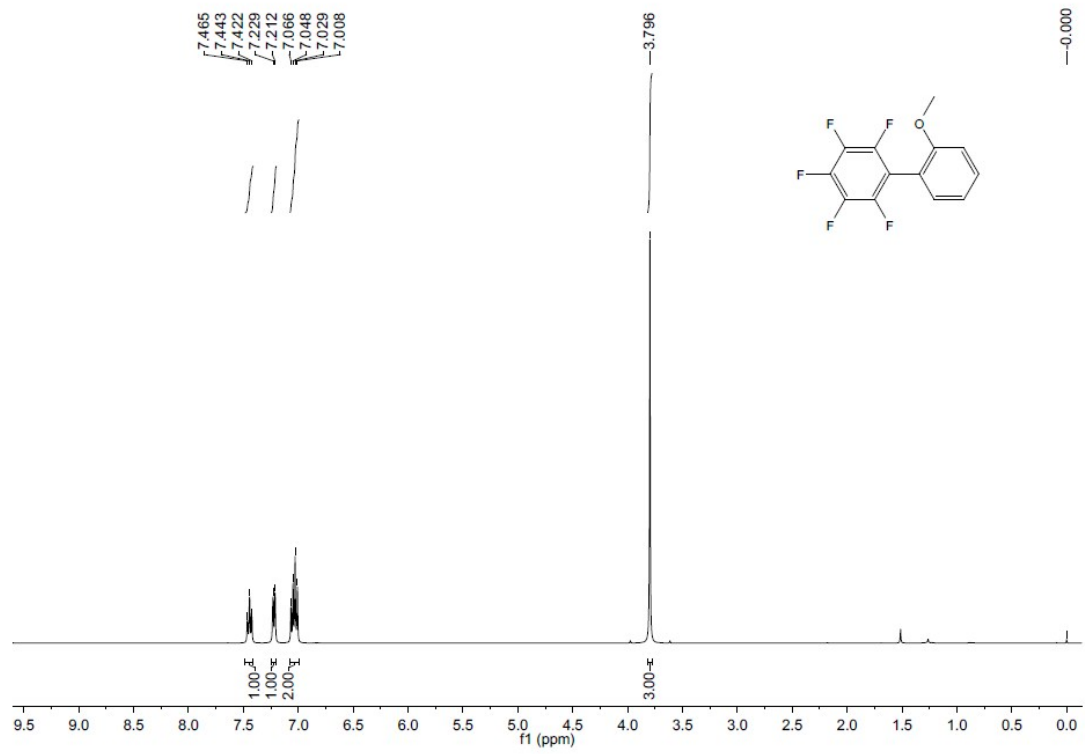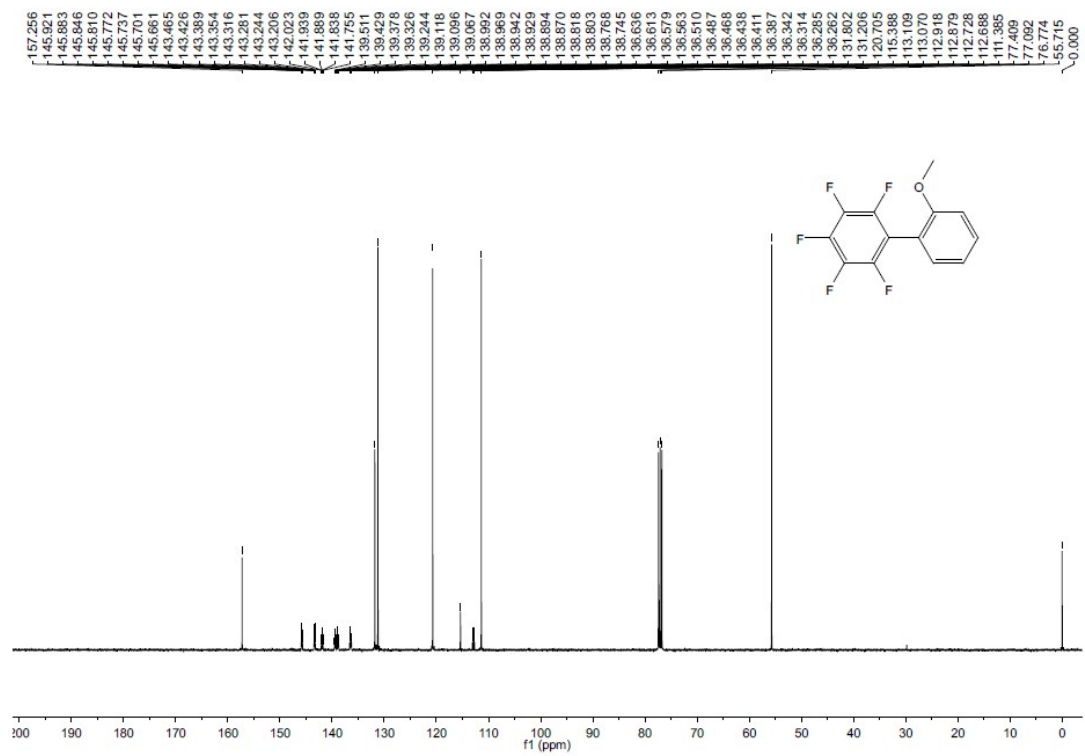

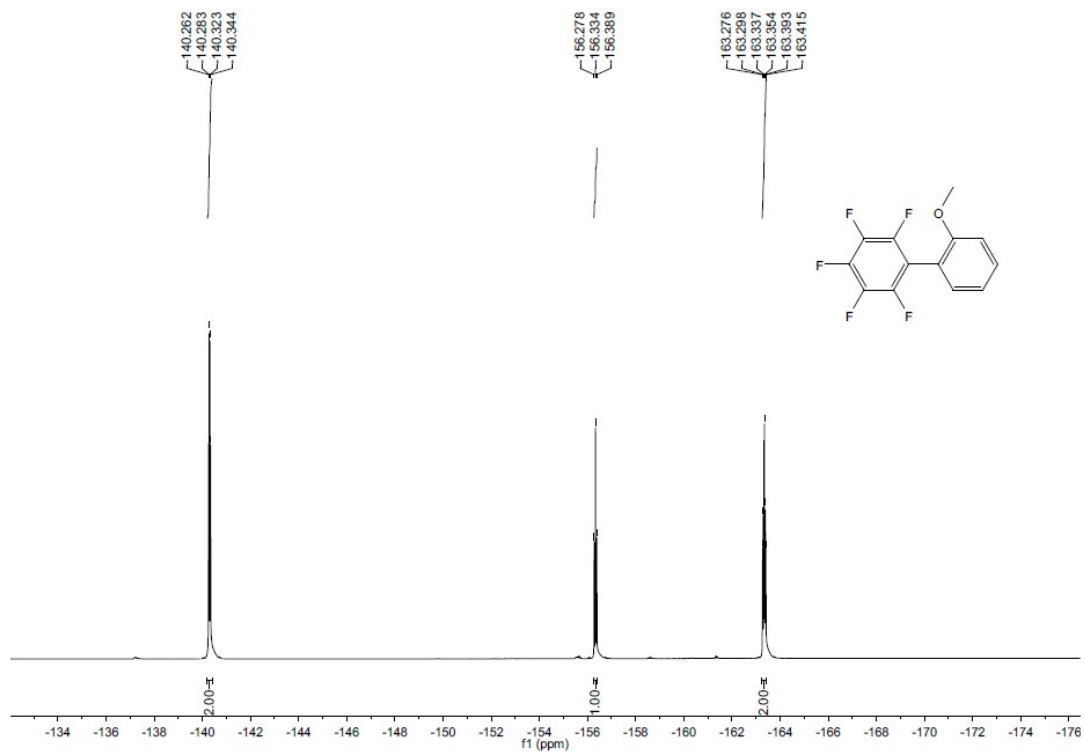

$^1\text{H}$  NMR,  $^{13}\text{C}$  NMR and  $^{19}\text{F}$  NMR spectra of **30**

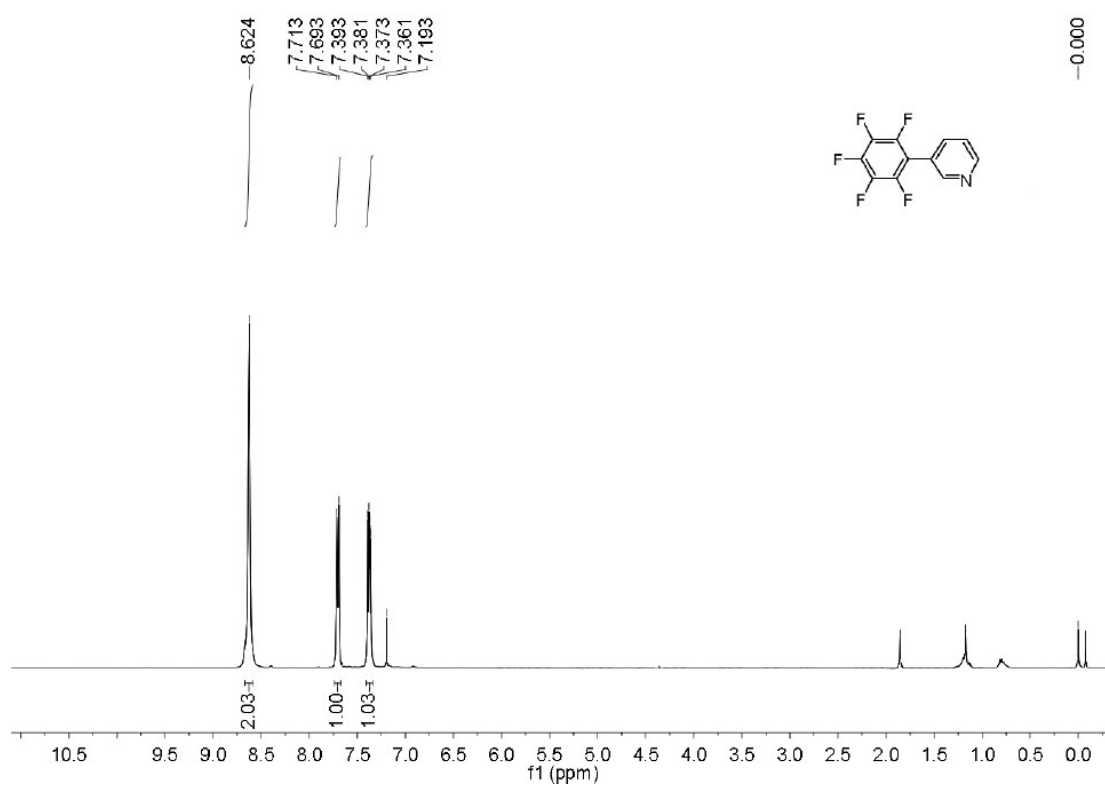

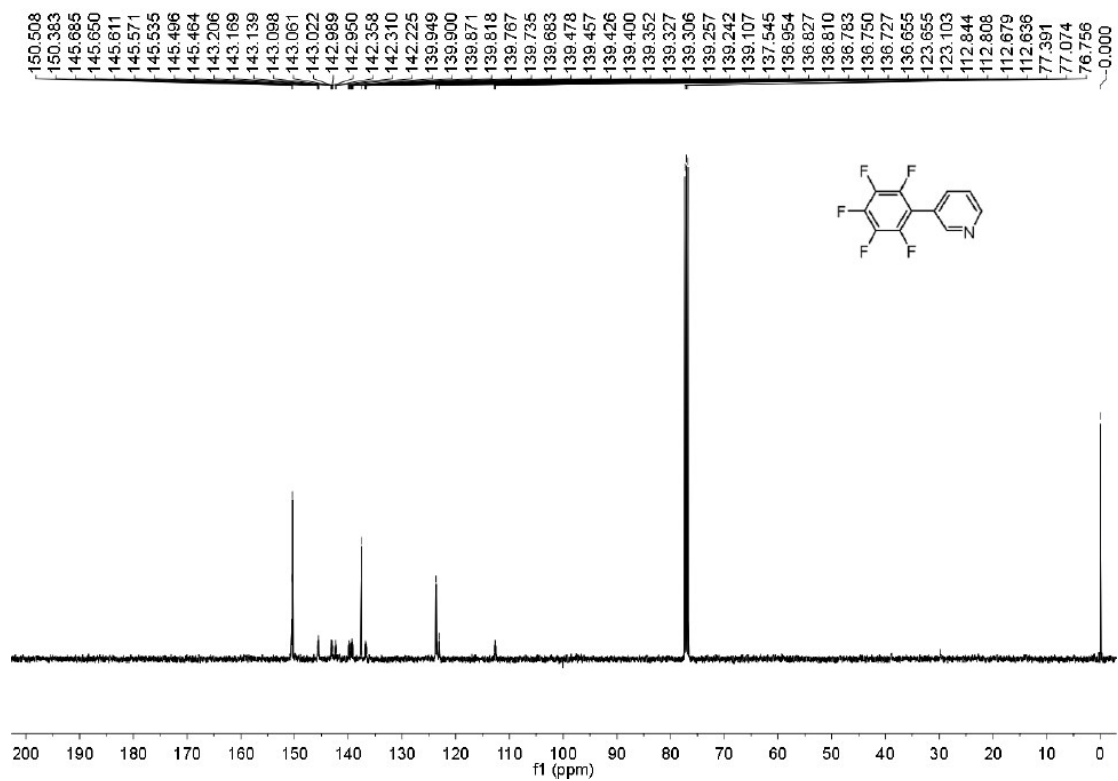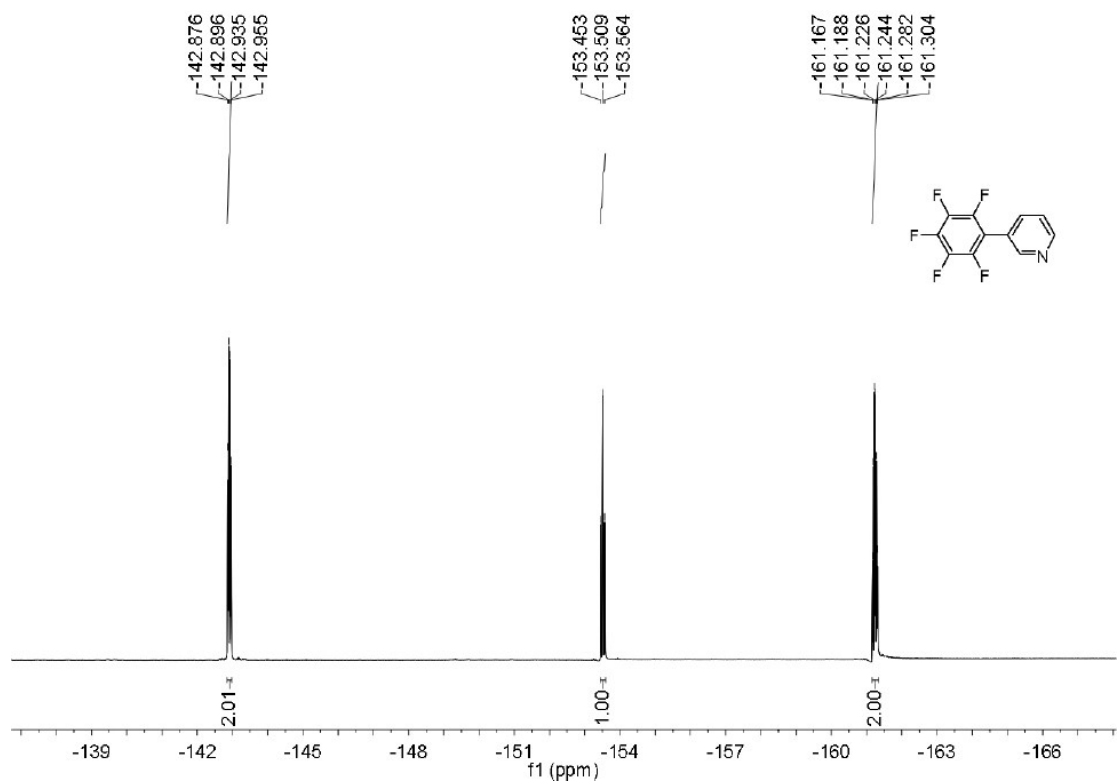

$^1\text{H}$  NMR,  $^{13}\text{C}$  NMR and  $^{19}\text{F}$  NMR spectra of **3p**

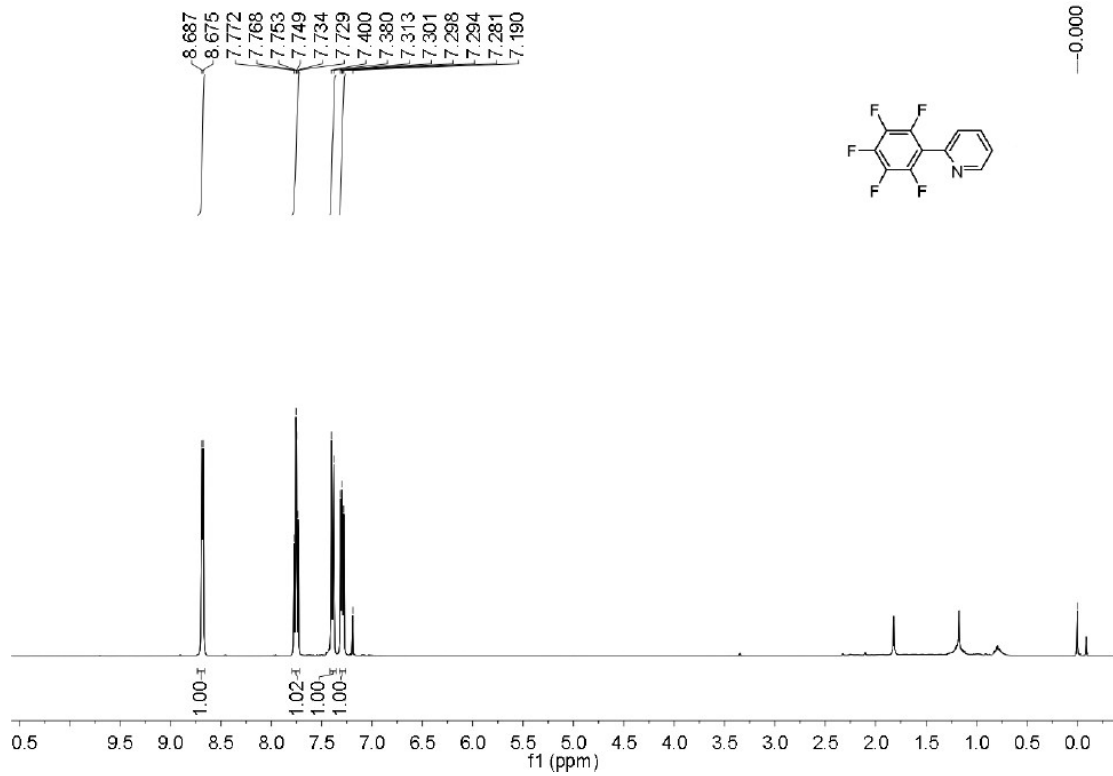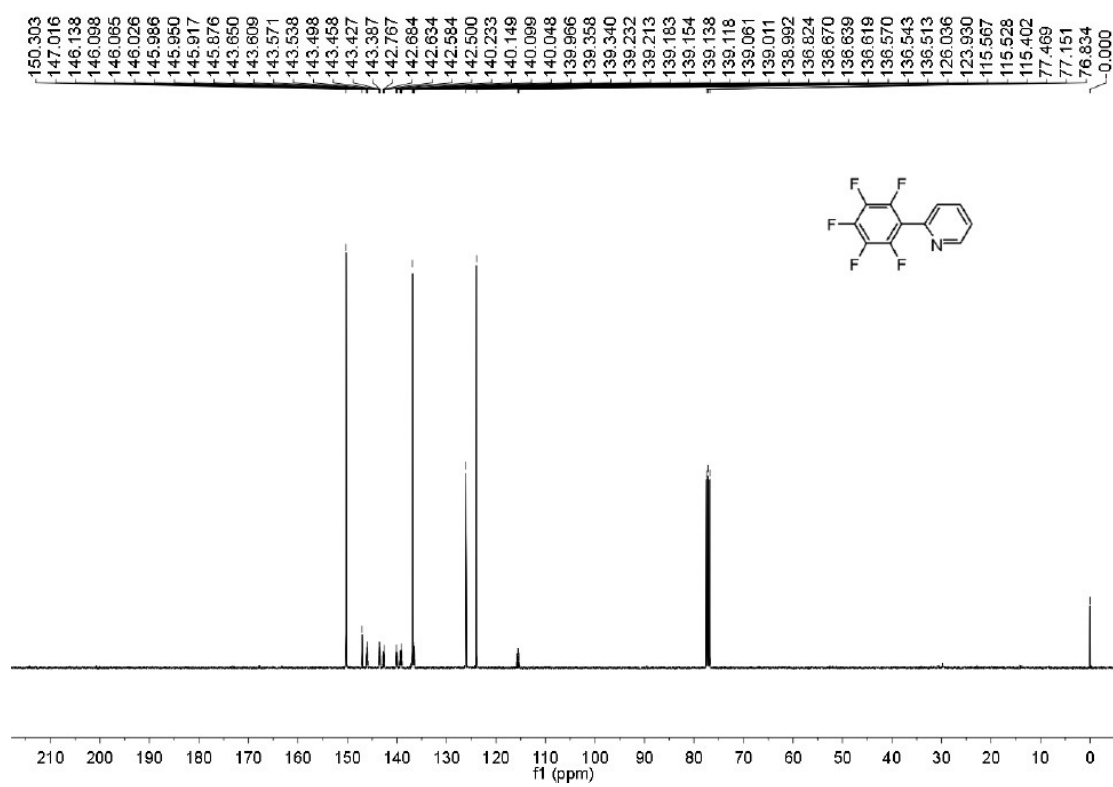

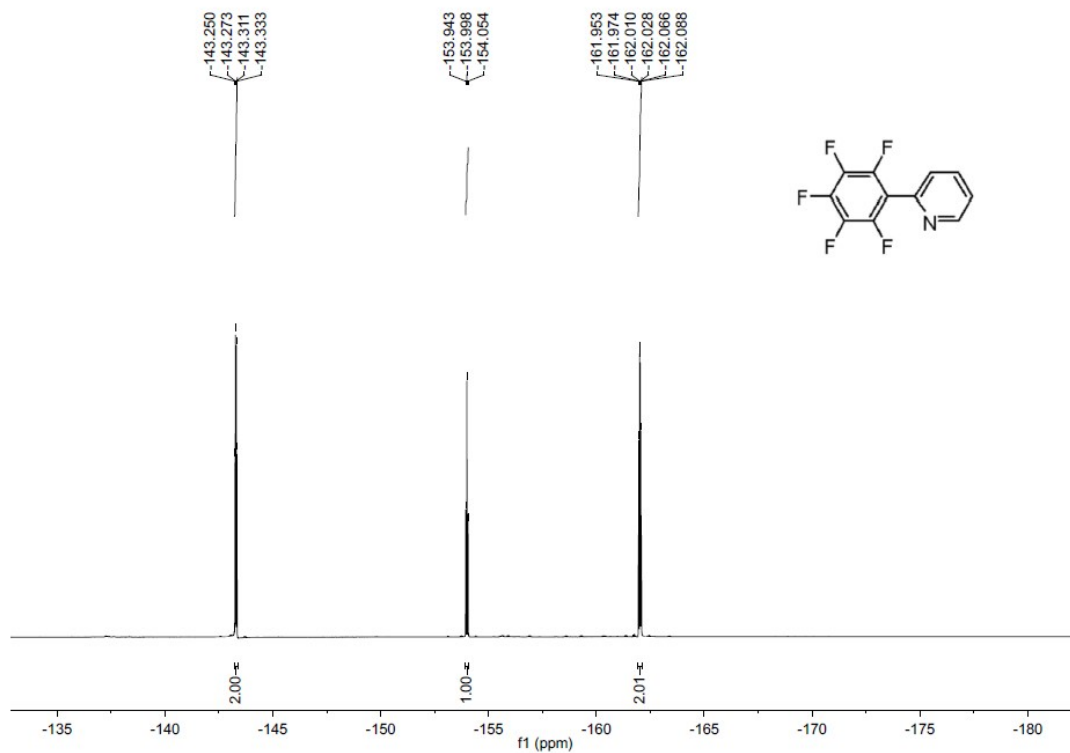

$^1\text{H}$  NMR,  $^{13}\text{C}$  NMR and  $^{19}\text{F}$  NMR spectra of **3q**

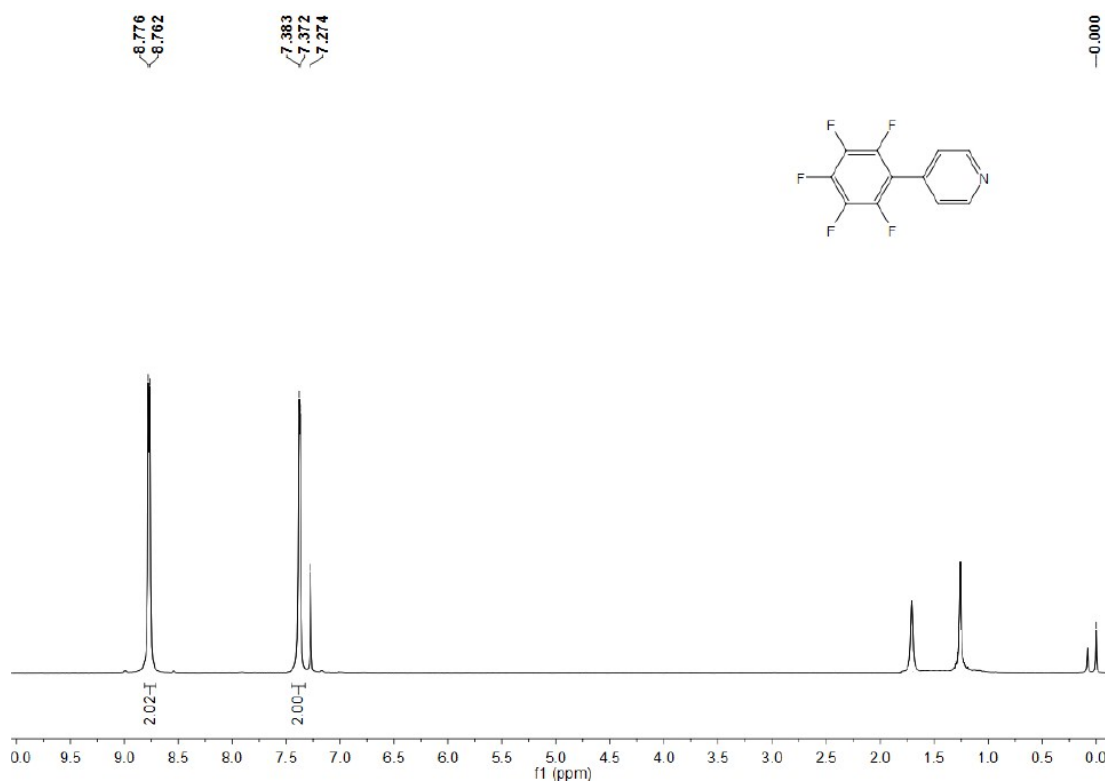

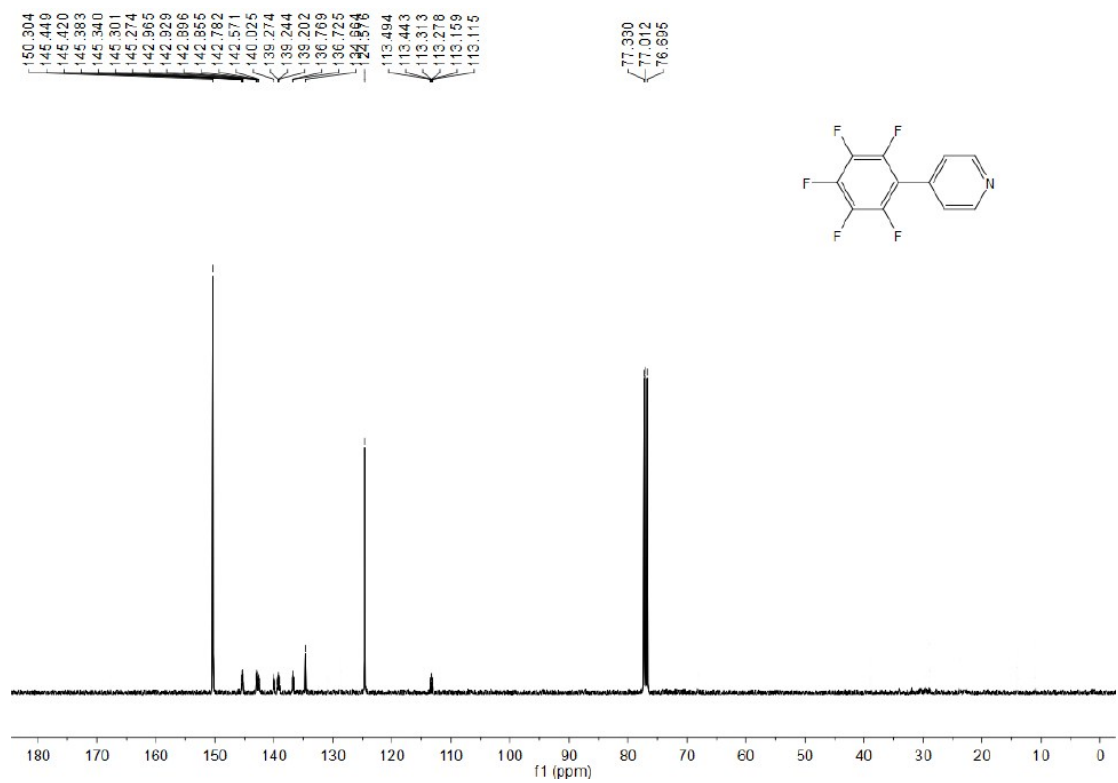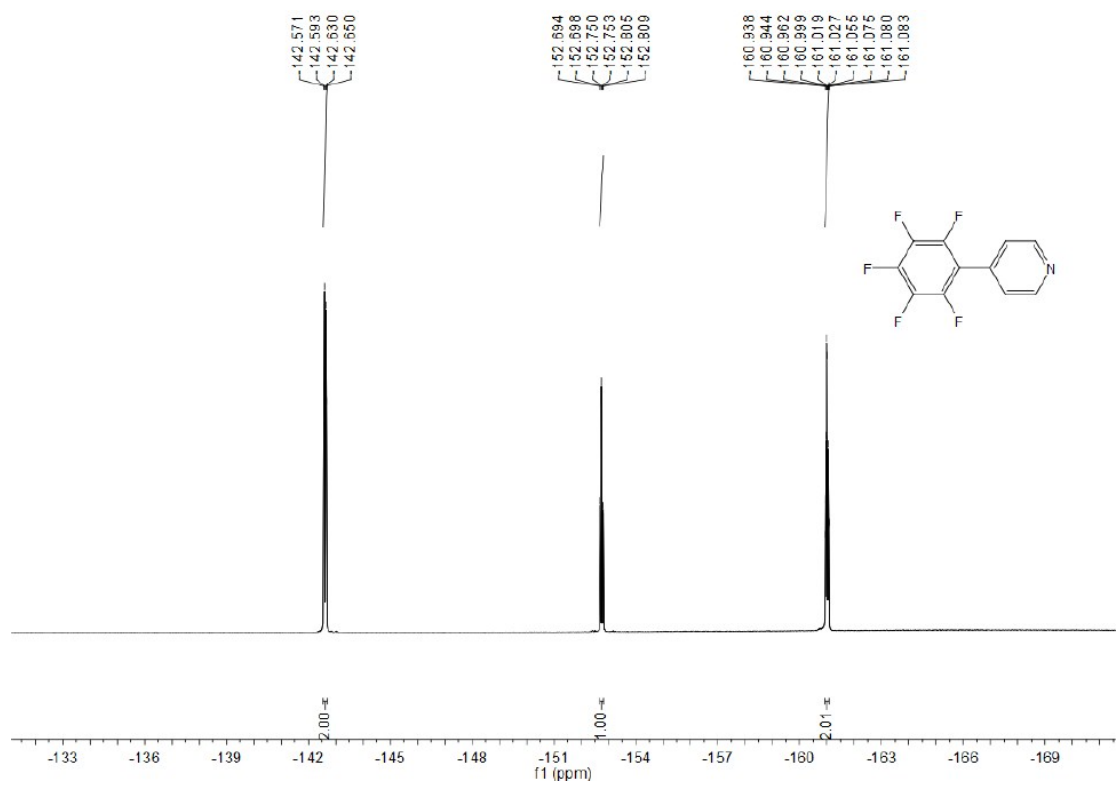

$^1\text{H}$  NMR,  $^{13}\text{C}$  NMR and  $^{19}\text{F}$  NMR spectra of **3r**

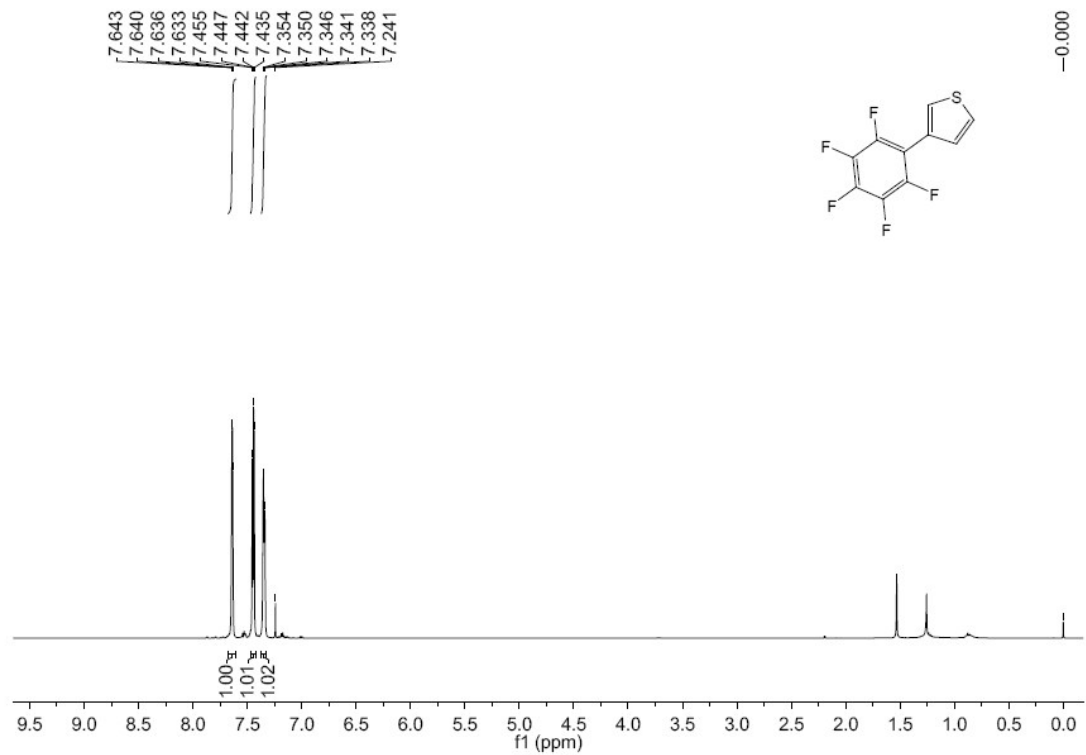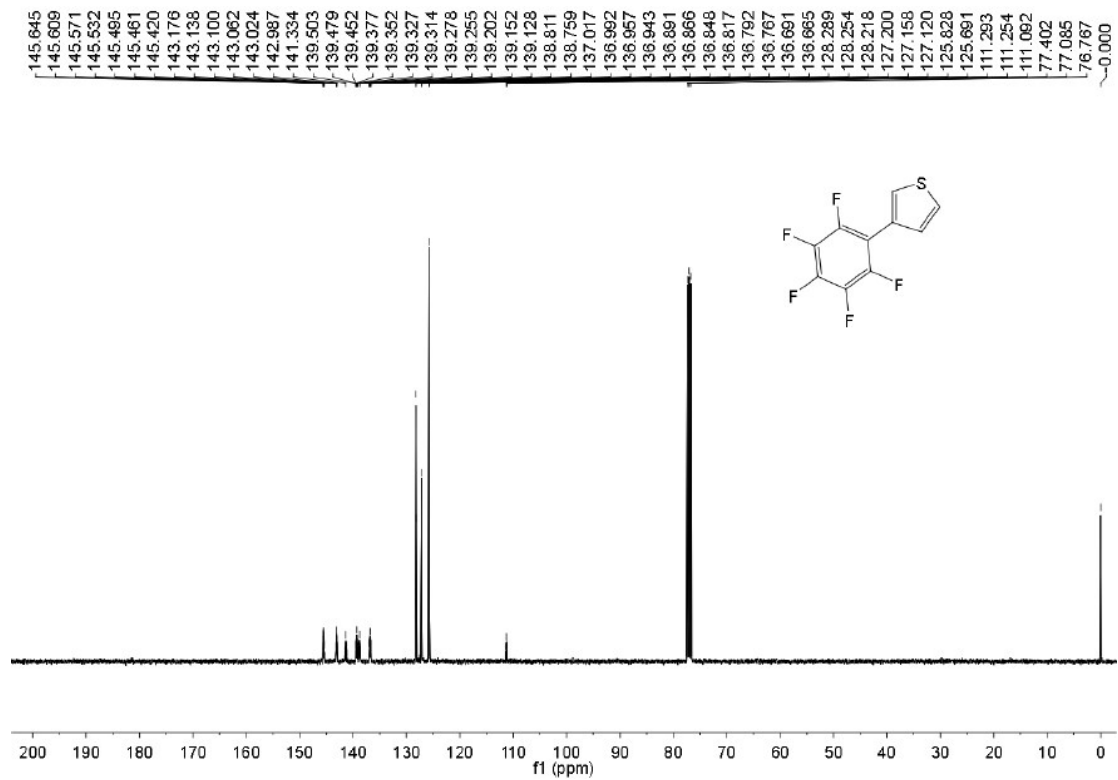

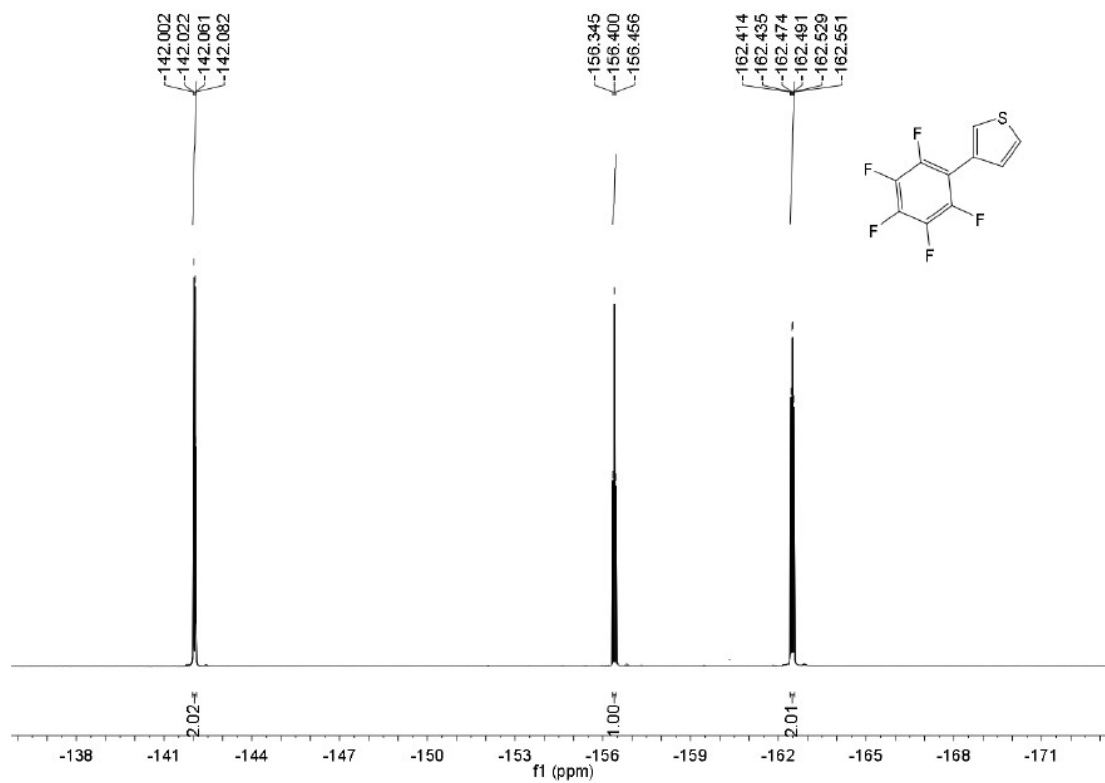

$^1\text{H}$  NMR,  $^{13}\text{C}$  NMR and  $^{19}\text{F}$  NMR spectra of **3s**

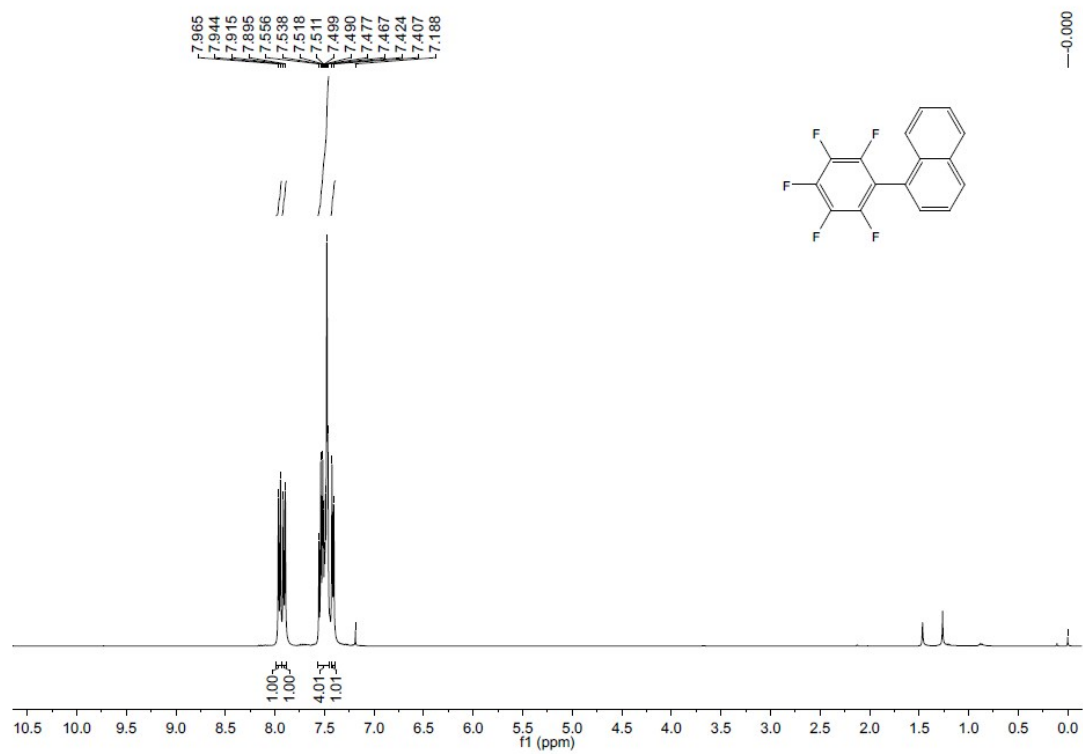



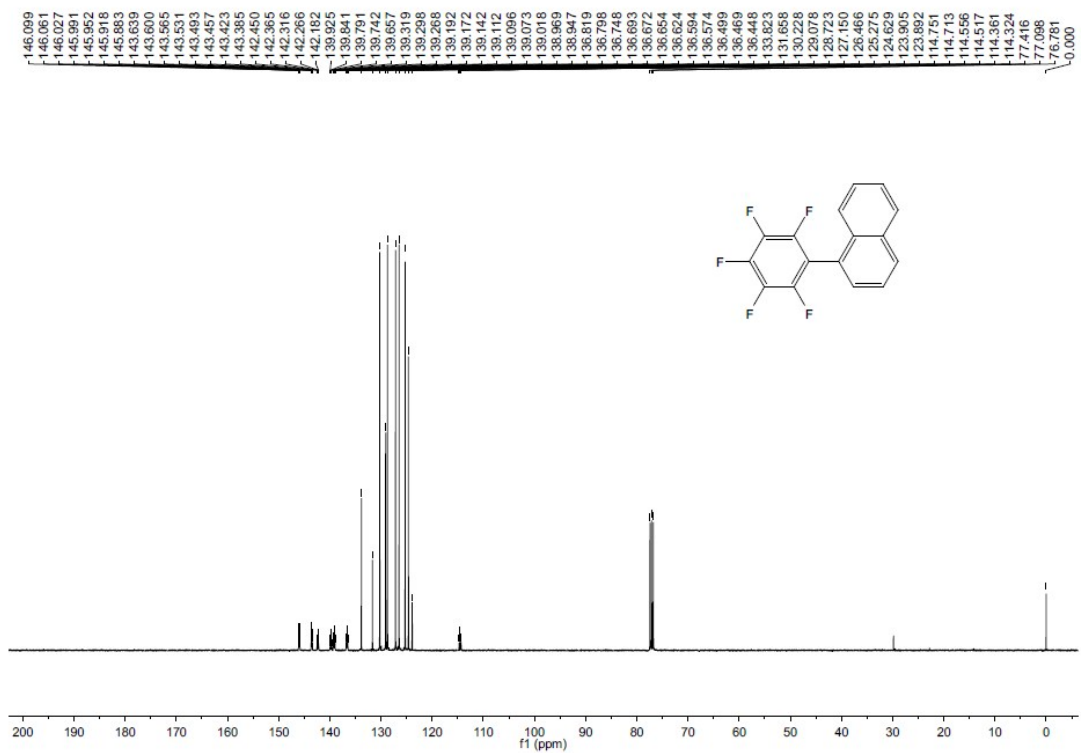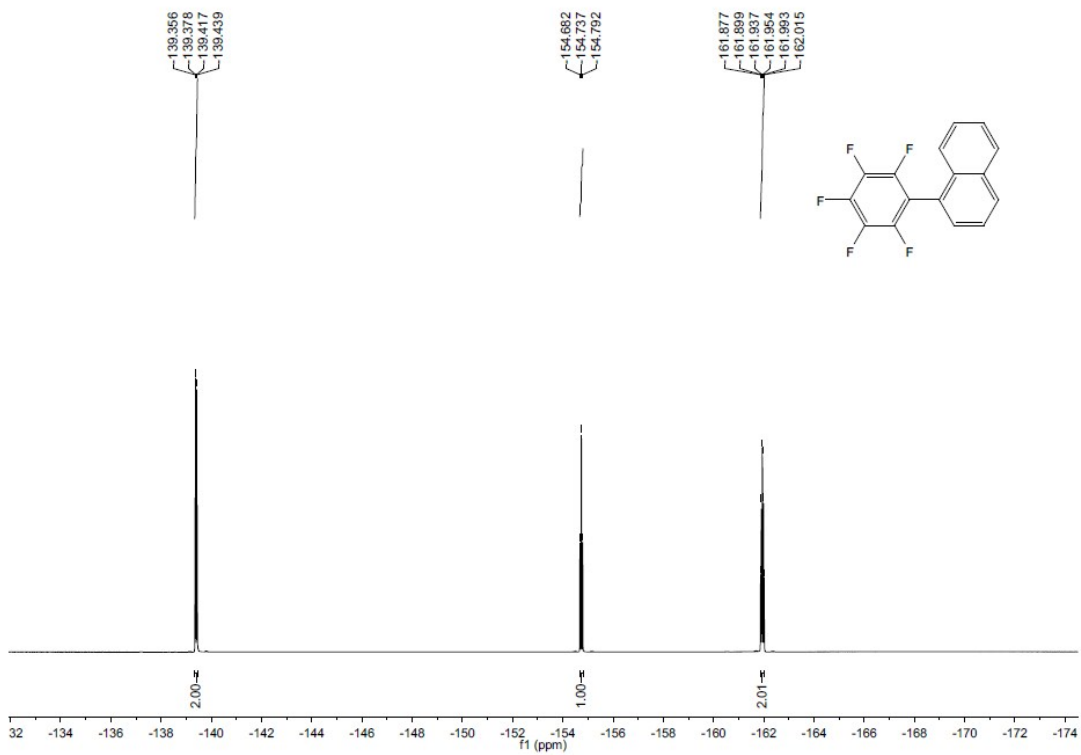

$^1\text{H}$  NMR,  $^{13}\text{C}$  NMR and  $^{19}\text{F}$  NMR spectra of **3t**

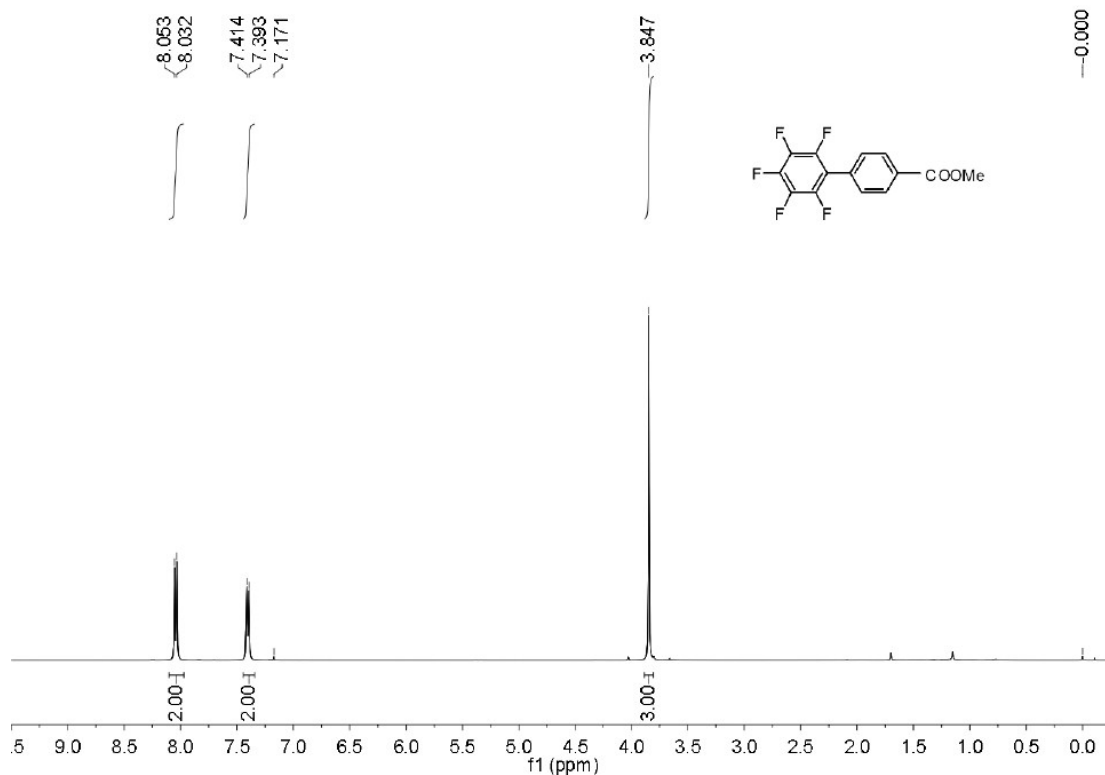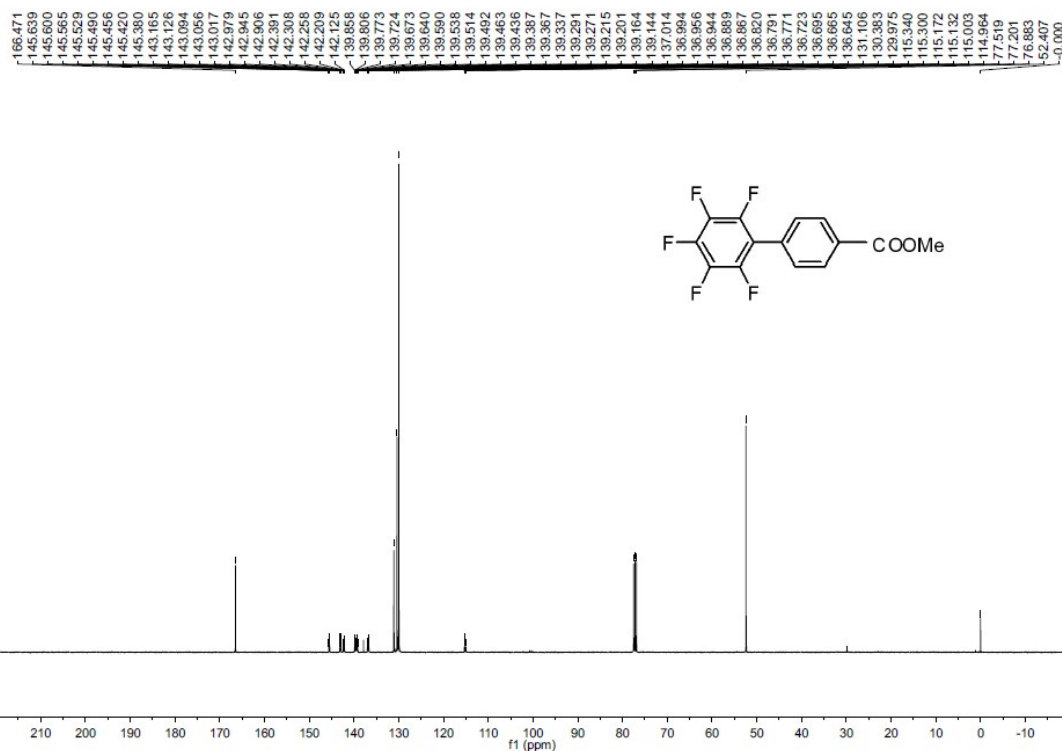

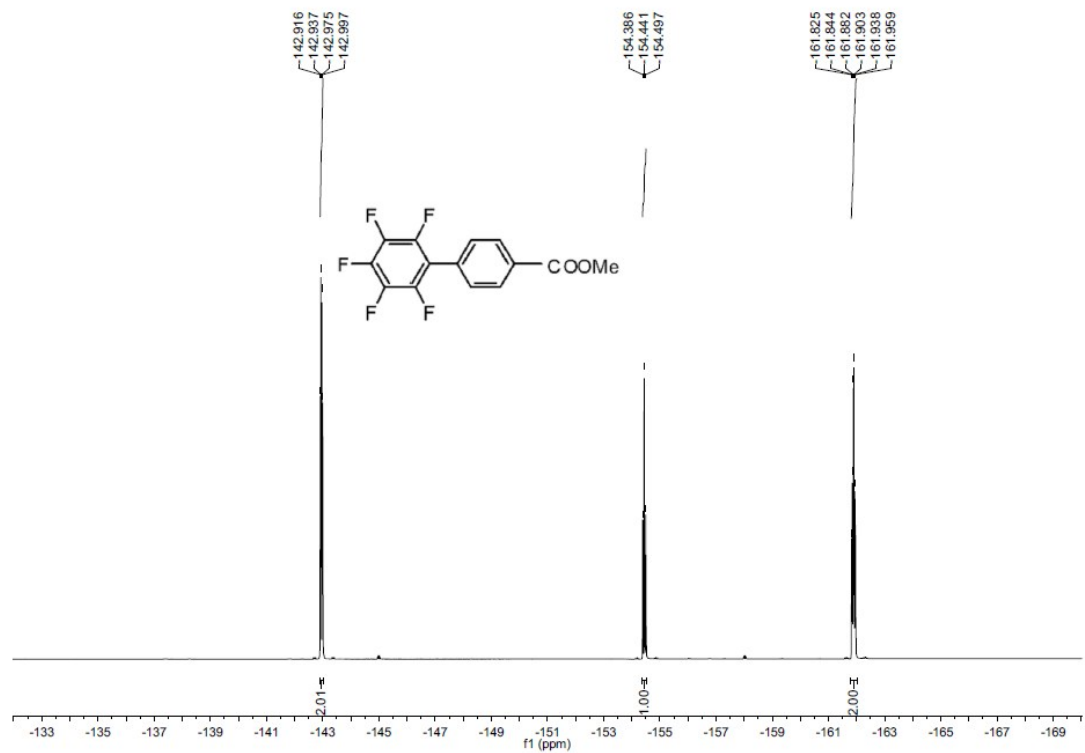

<sup>1</sup>H NMR, <sup>13</sup>C NMR and <sup>19</sup>F NMR spectra of **3u**

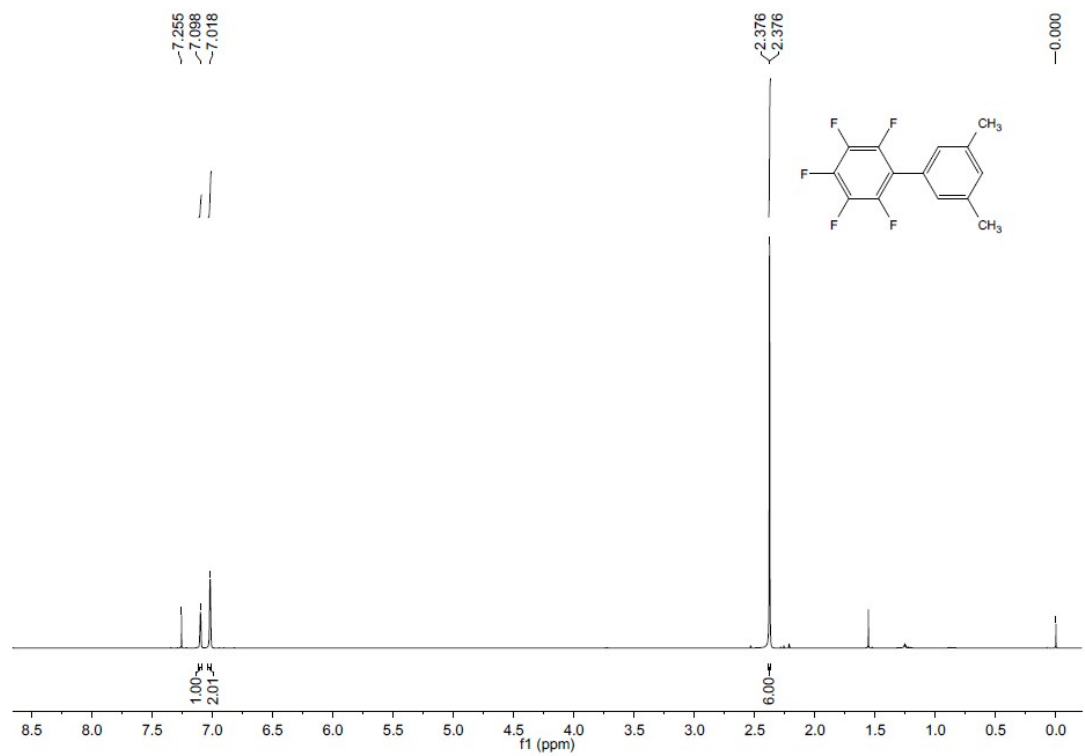

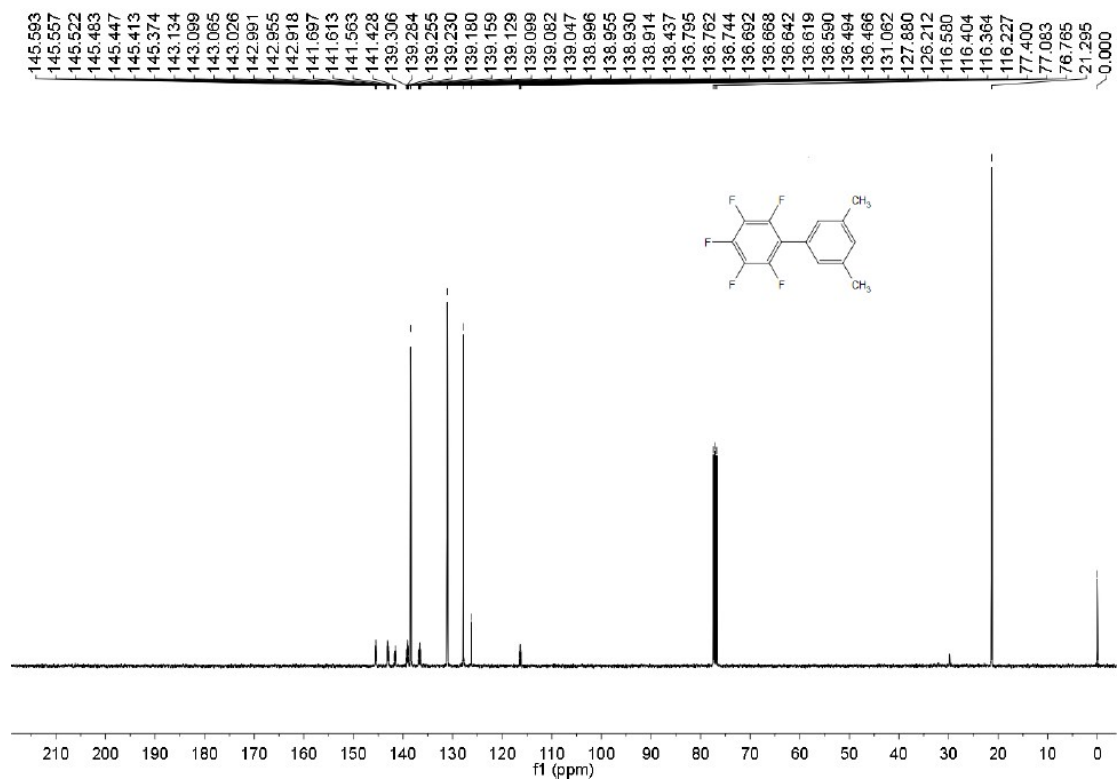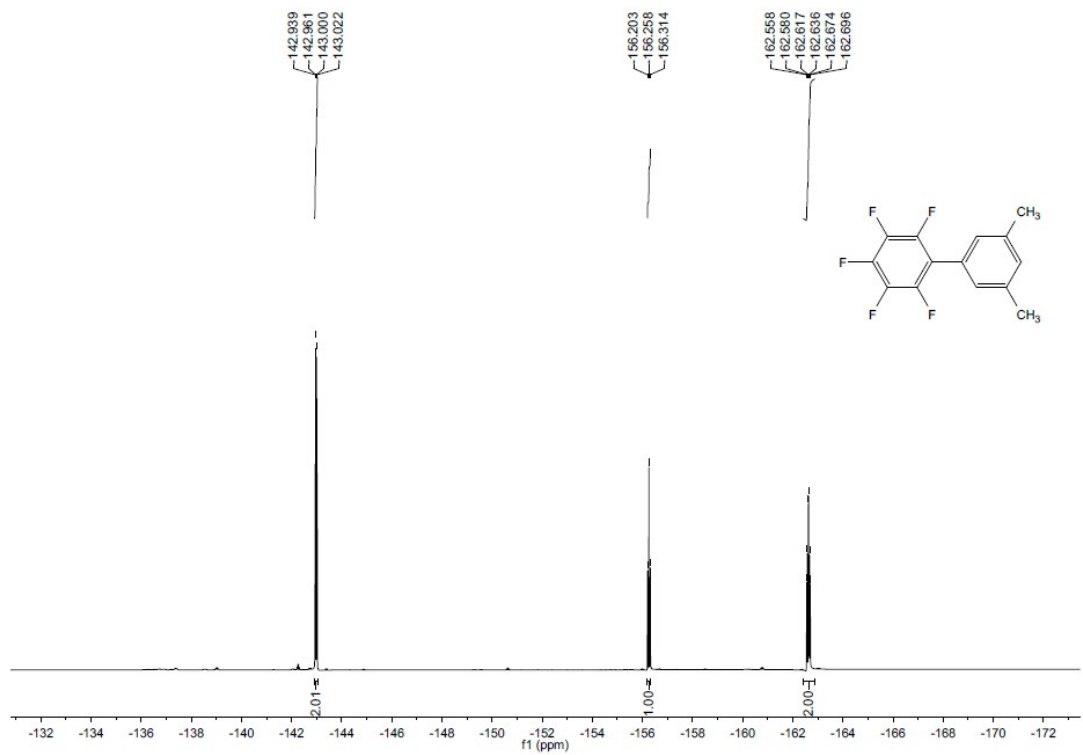

<sup>1</sup>H NMR, <sup>13</sup>C NMR and <sup>19</sup>F NMR spectra of **3v**

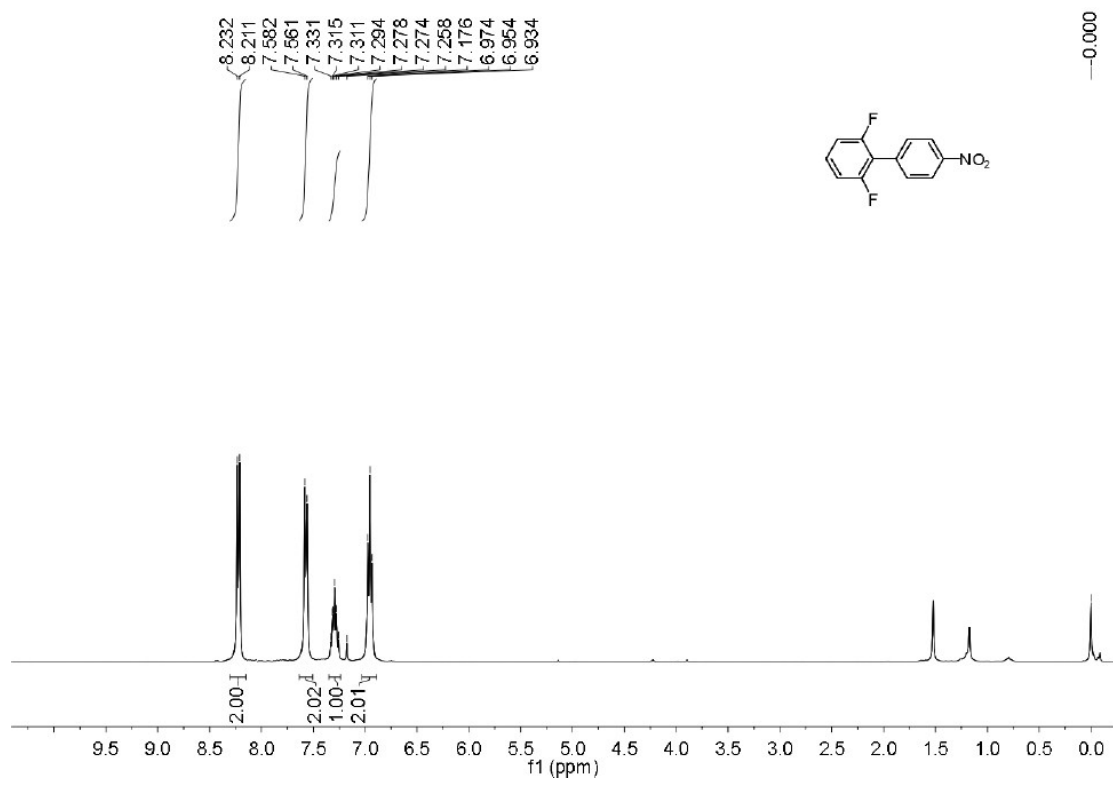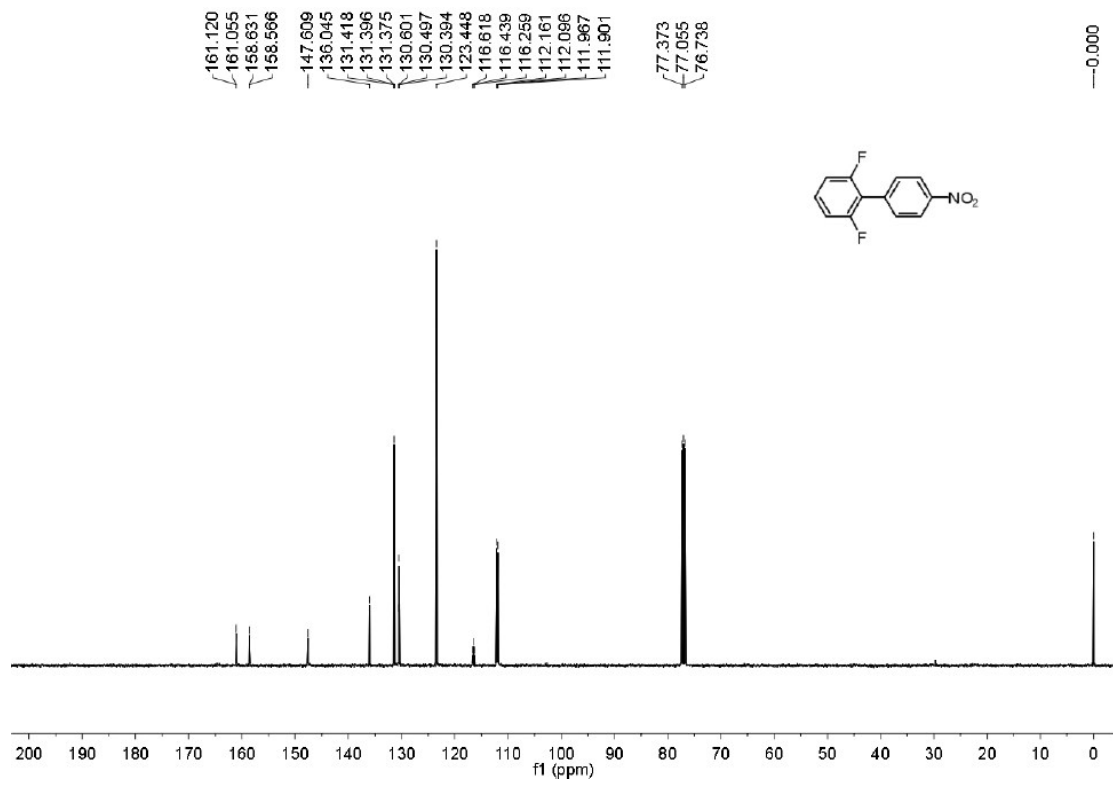

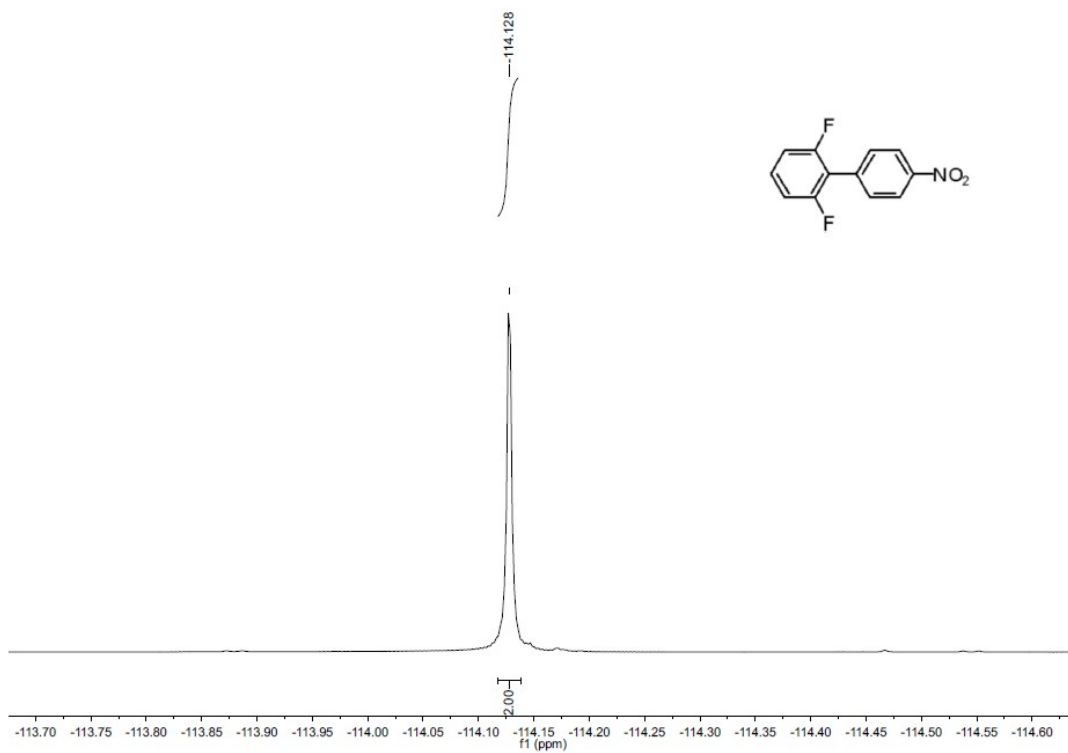

$^1\text{H}$  NMR,  $^{13}\text{C}$  NMR and  $^{19}\text{F}$  NMR spectra of **5a**

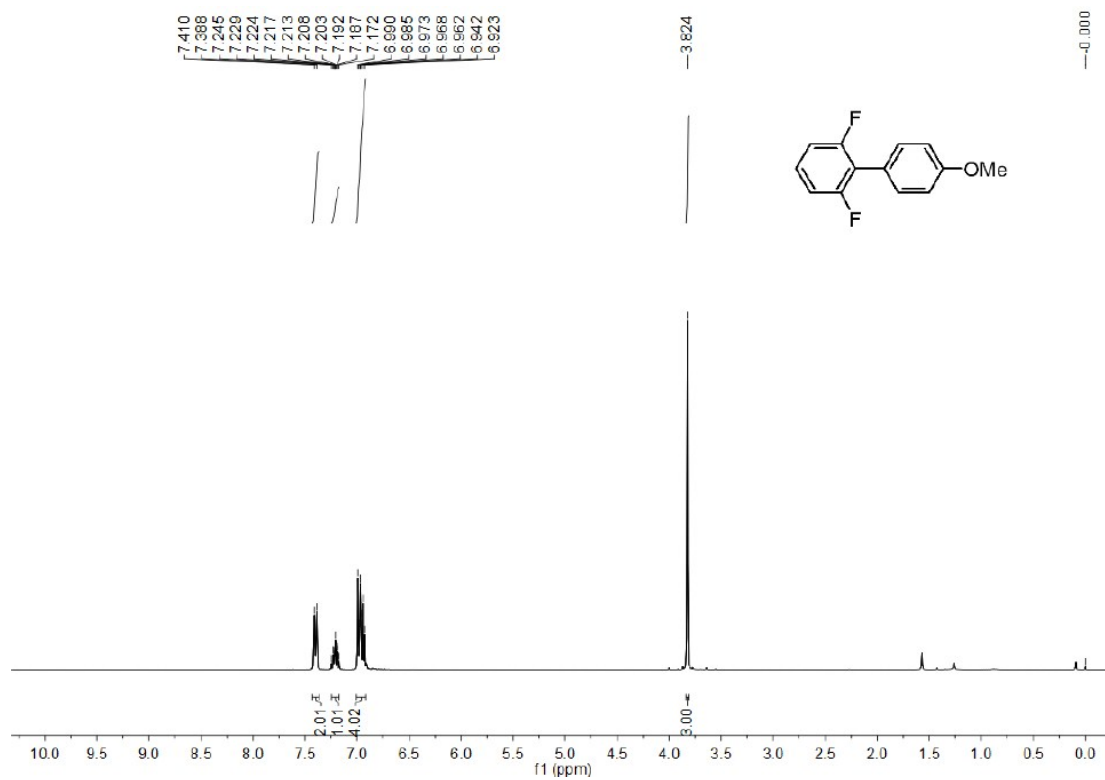

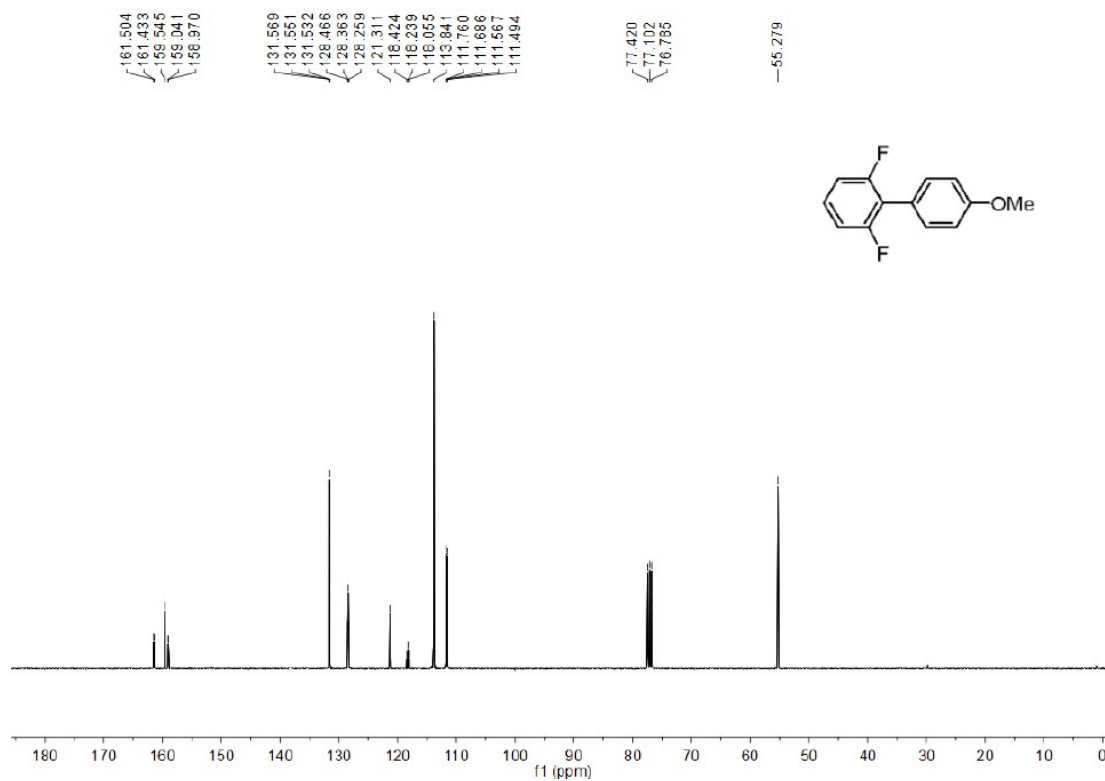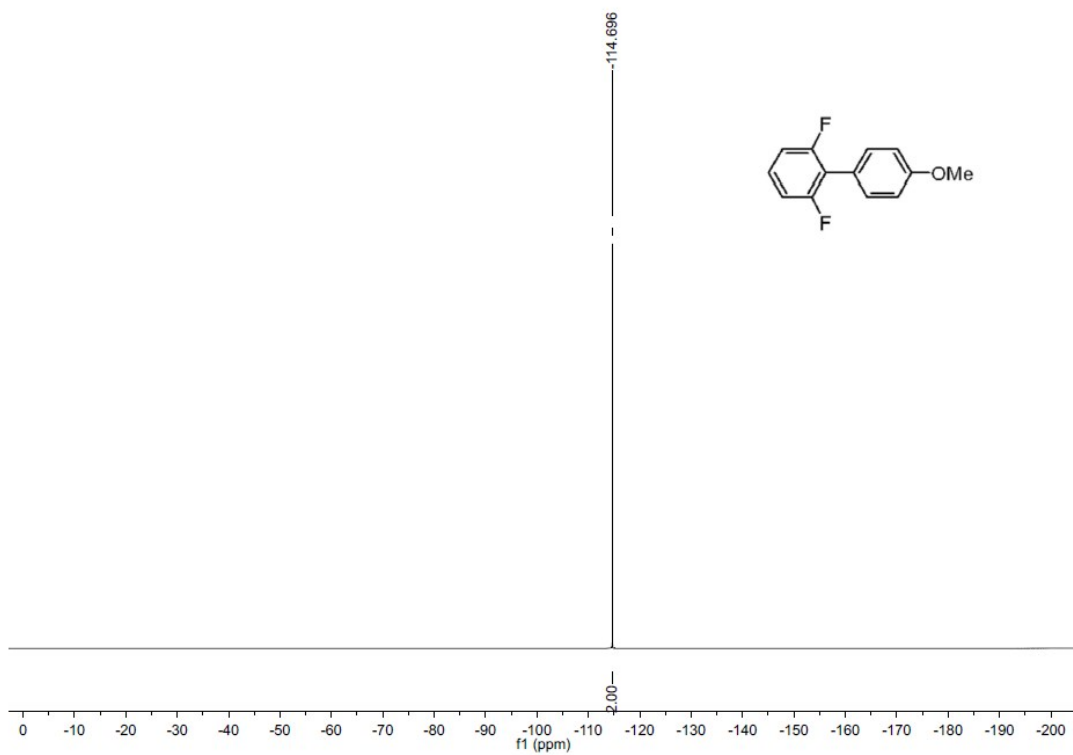

<sup>1</sup>H NMR, <sup>13</sup>C NMR and <sup>19</sup>F NMR spectra of **5b**

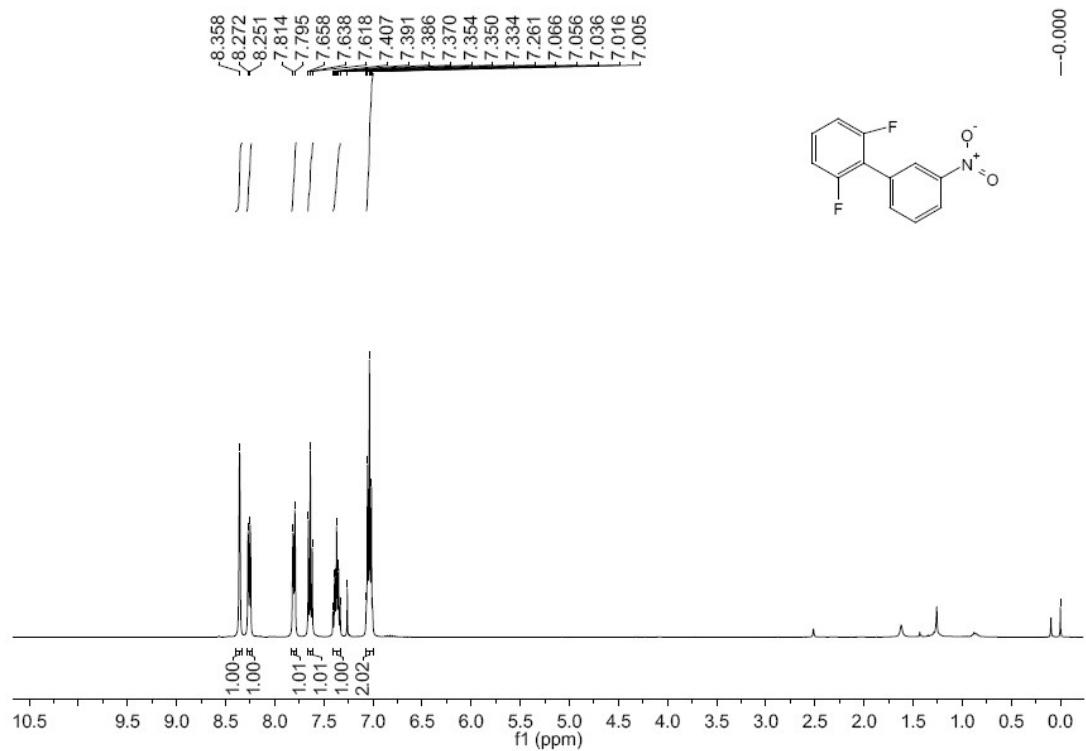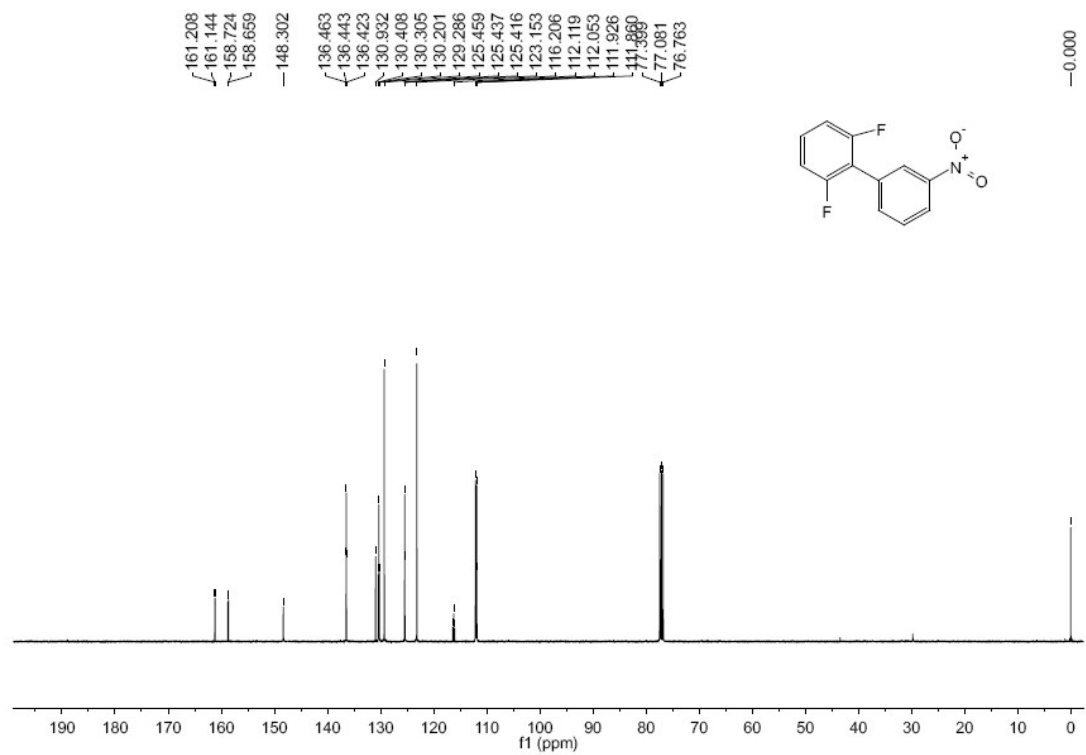



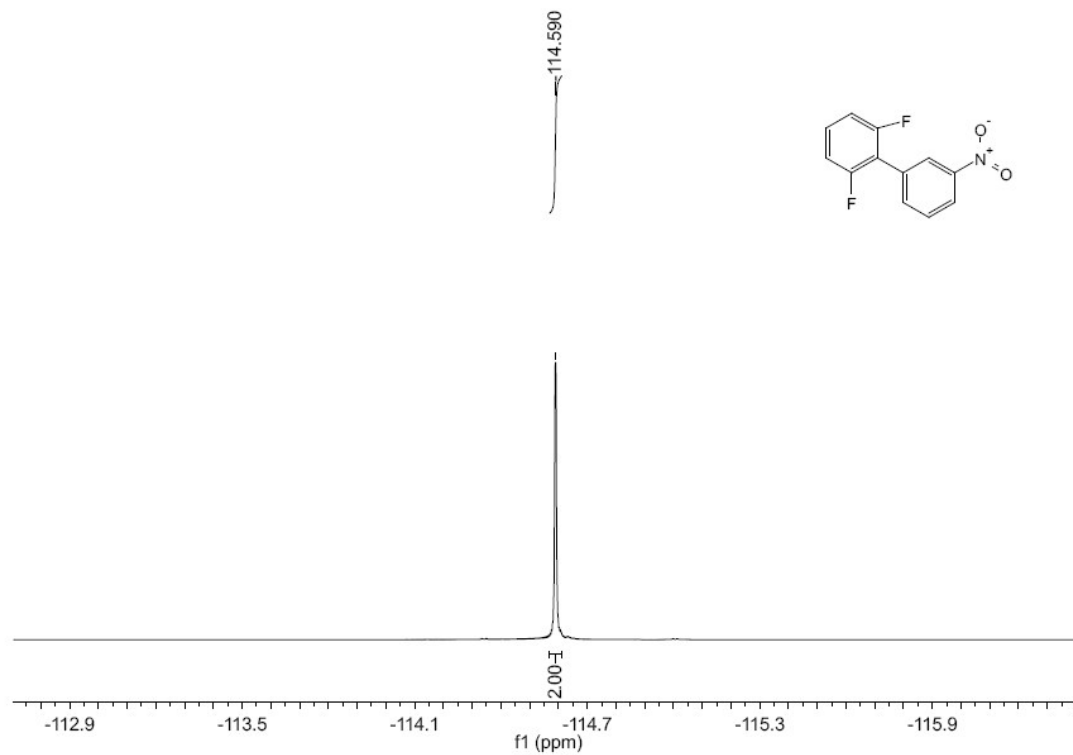

$^1\text{H}$  NMR,  $^{13}\text{C}$  NMR and  $^{19}\text{F}$  NMR spectra of **5c**

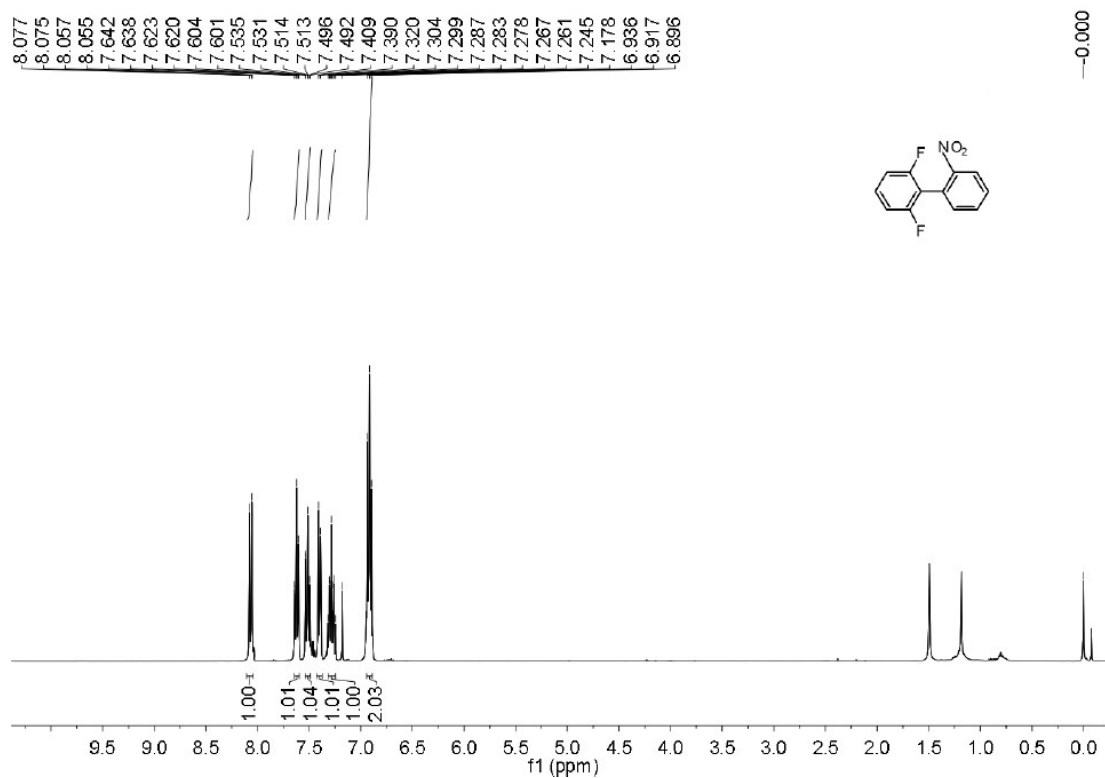

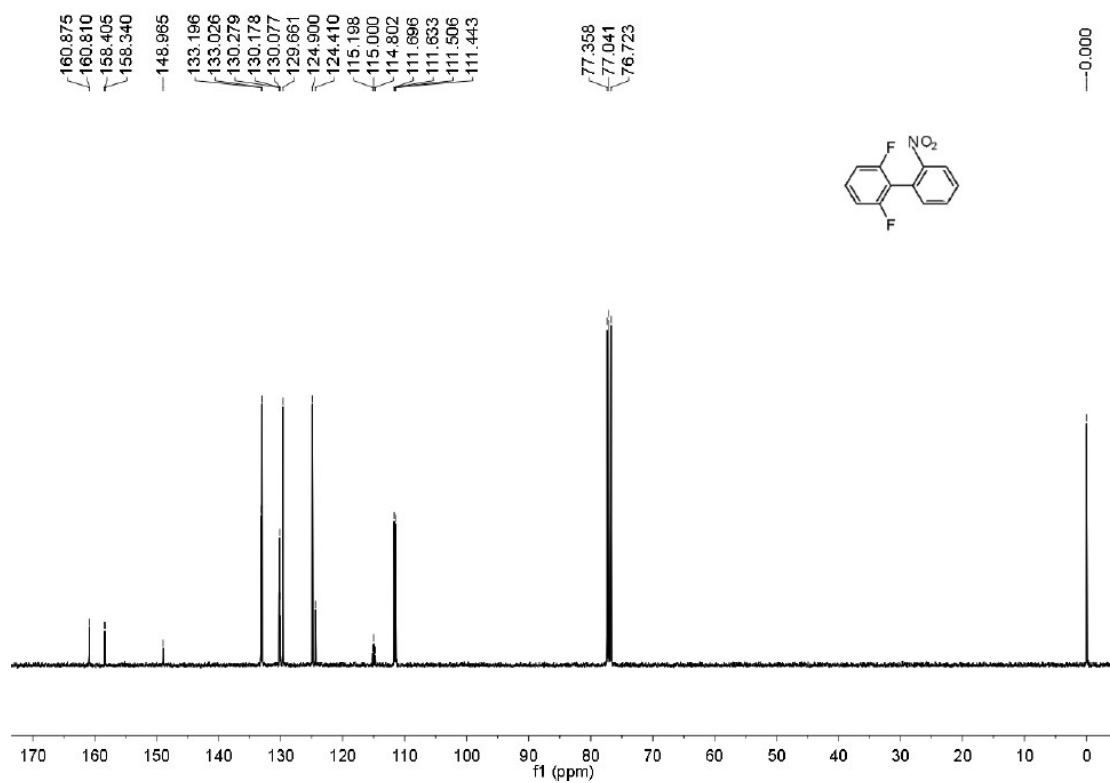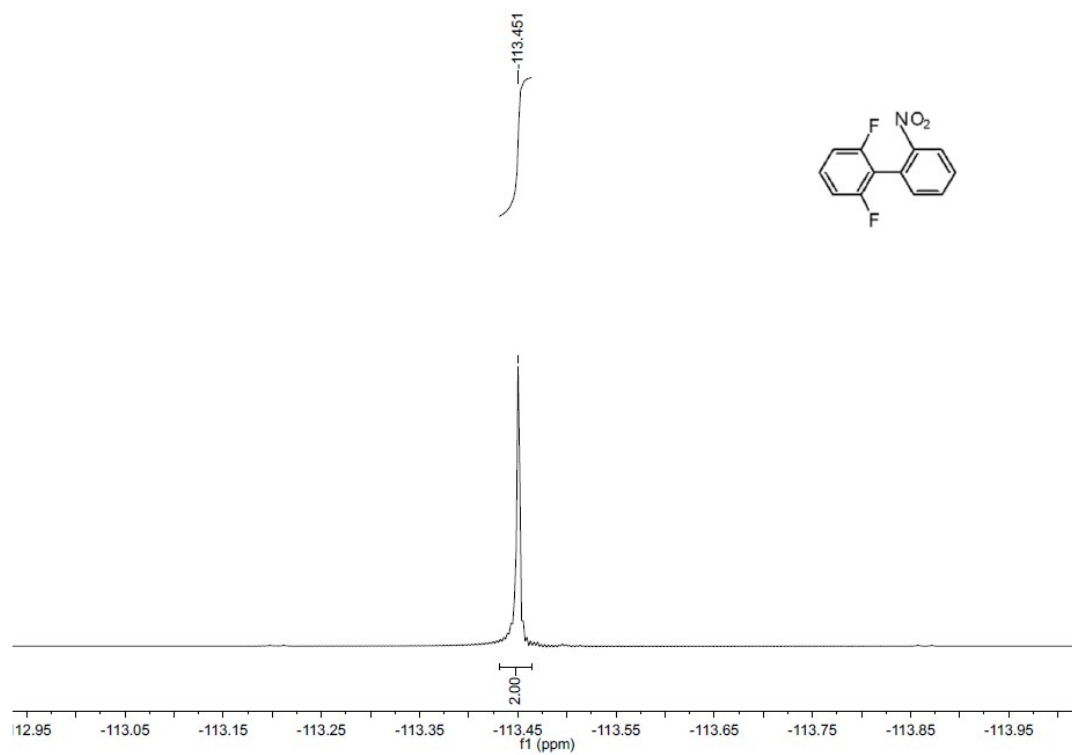

$^1\text{H}$  NMR,  $^{13}\text{C}$  NMR and  $^{19}\text{F}$  NMR spectra of **5d**

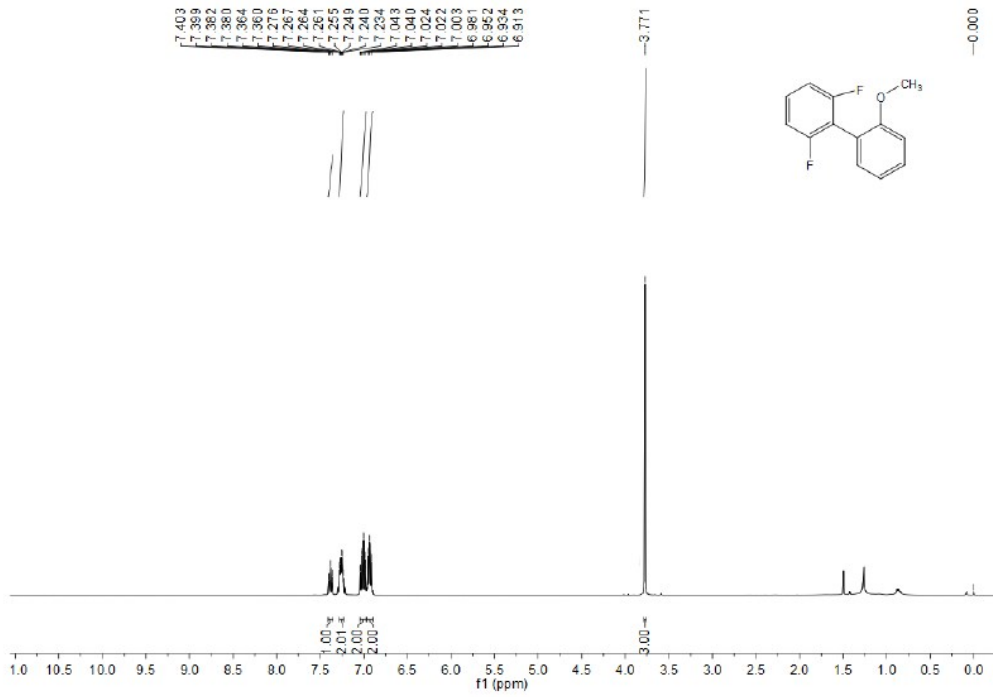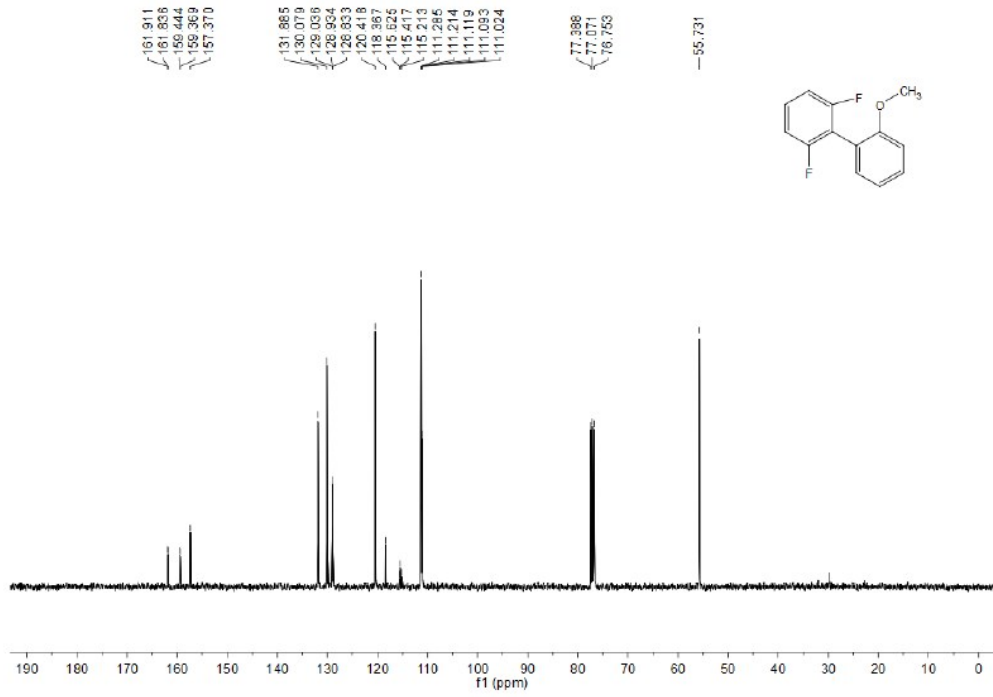

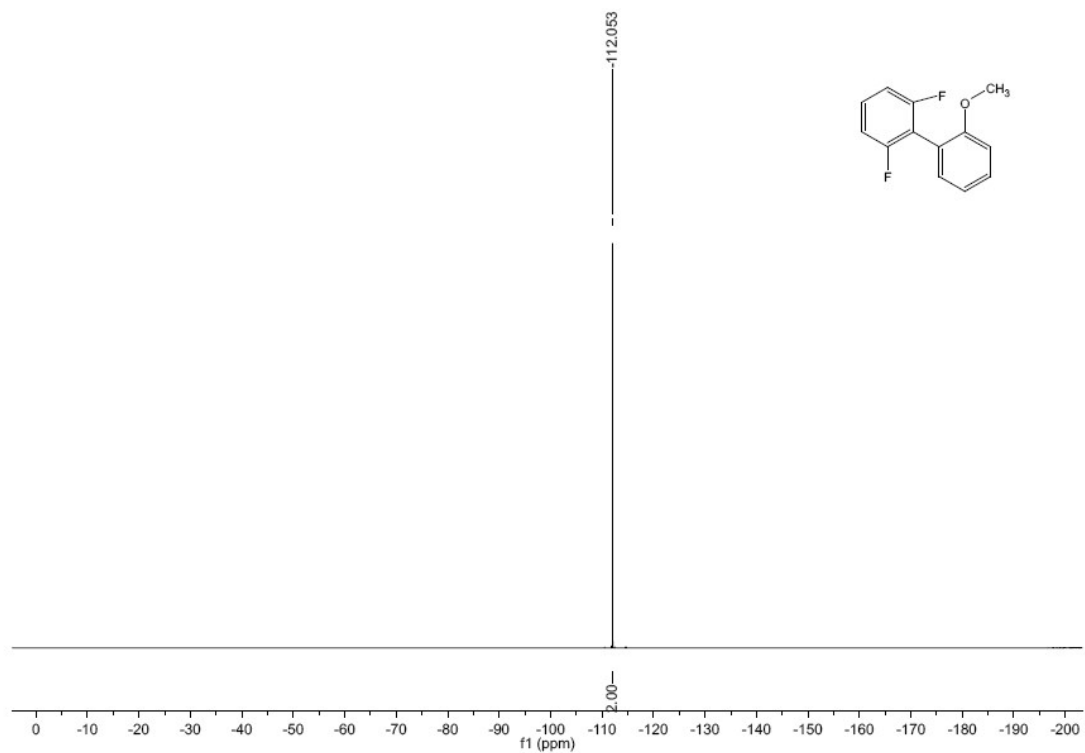

$^1\text{H}$  NMR,  $^{13}\text{C}$  NMR and  $^{19}\text{F}$  NMR spectra of **5e**

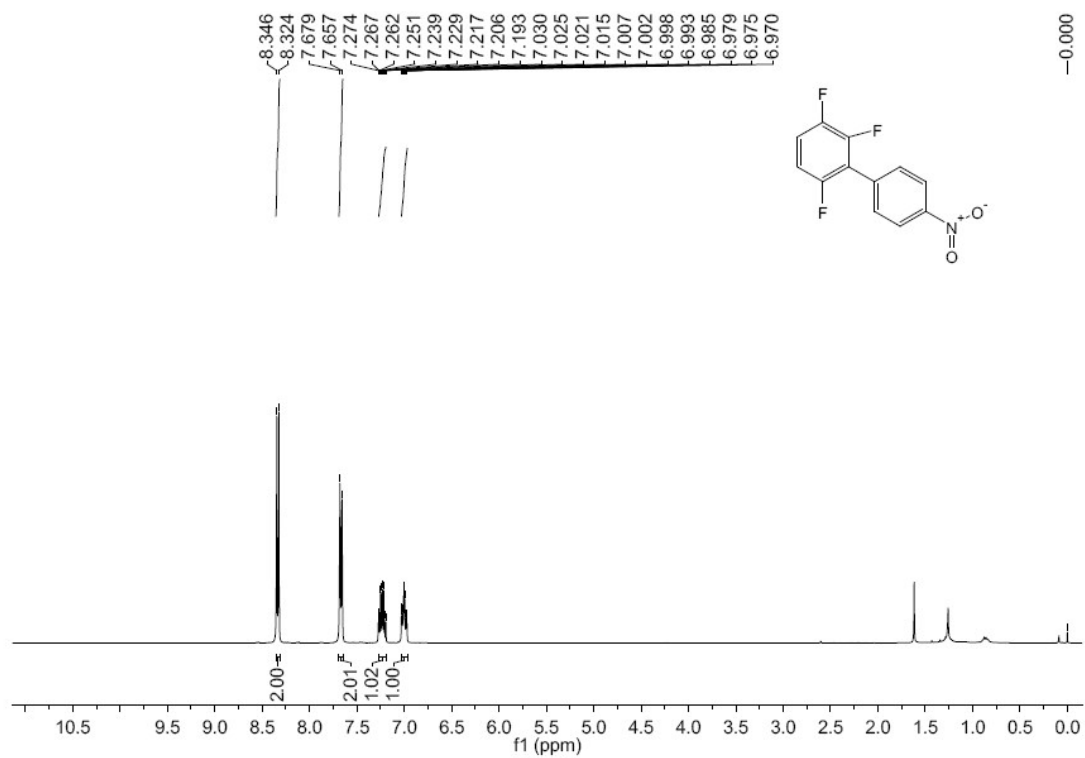

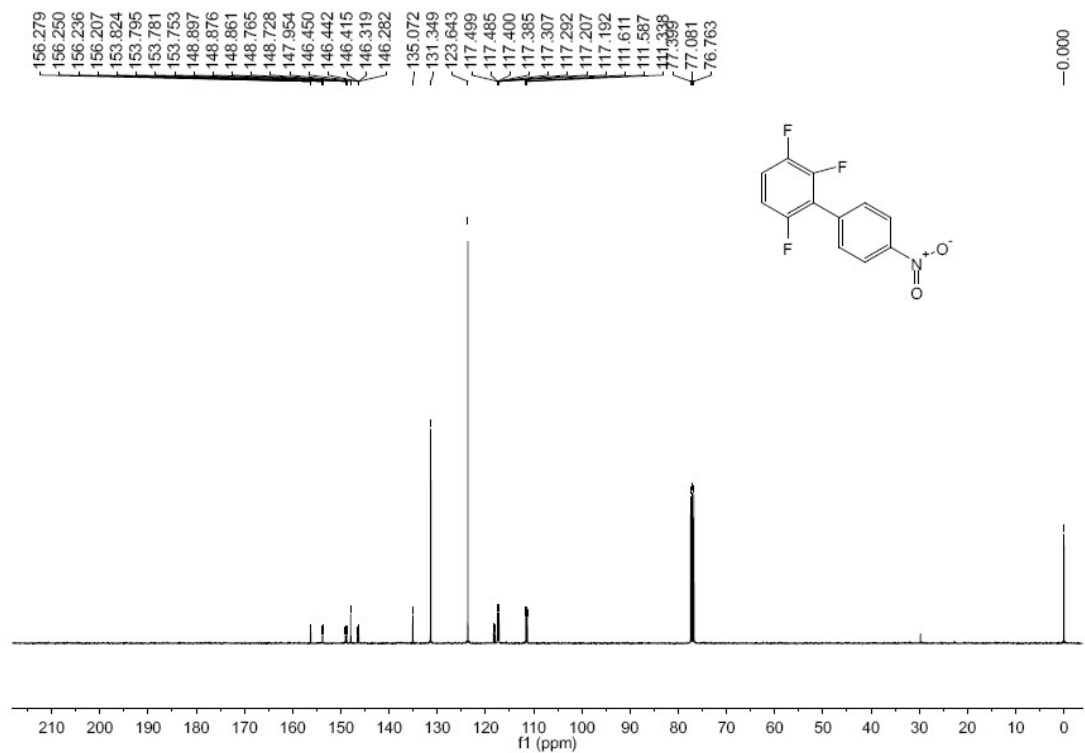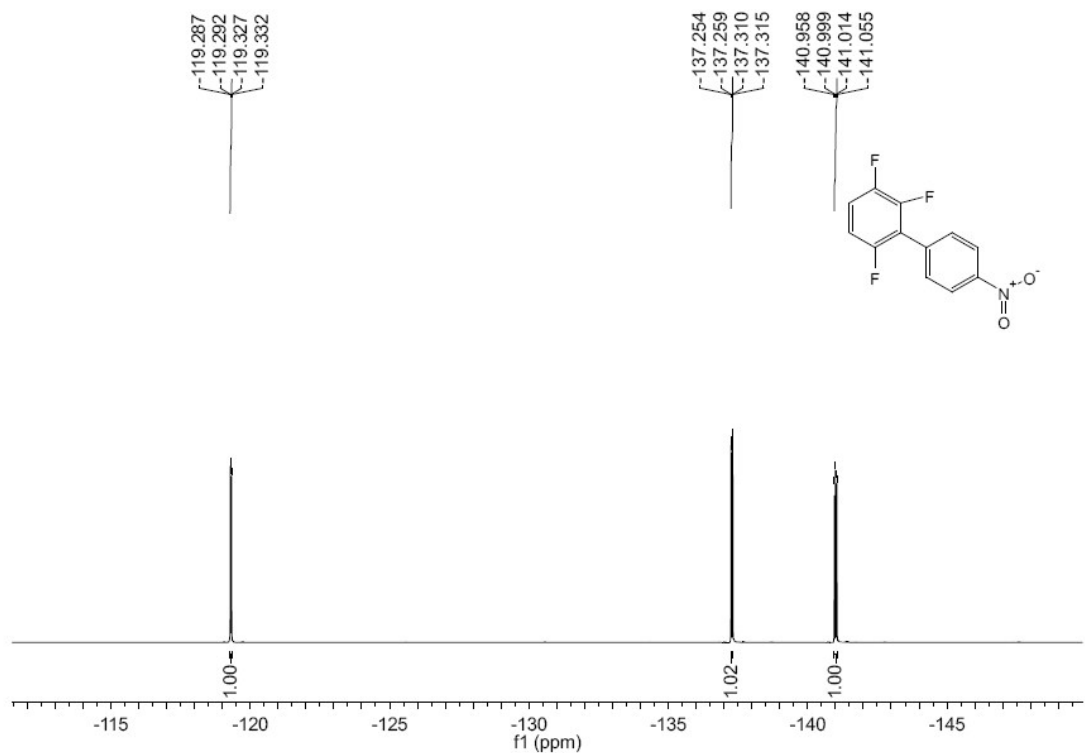

<sup>1</sup>H NMR, <sup>13</sup>C NMR and <sup>19</sup>F NMR spectra of **5f**

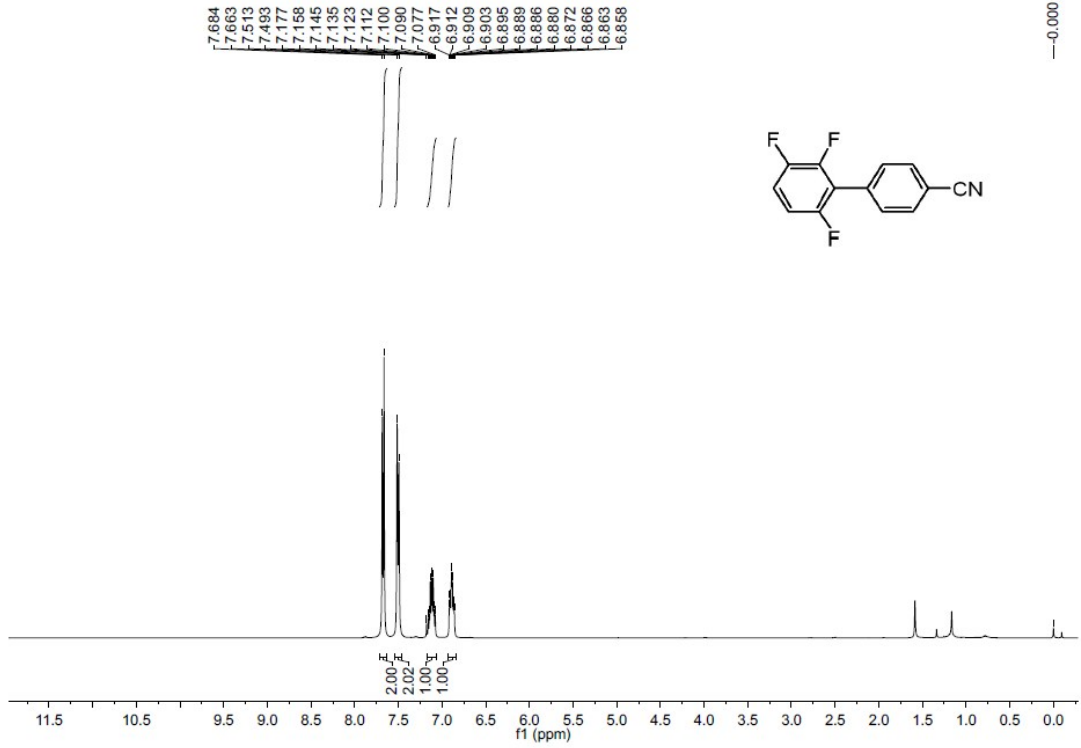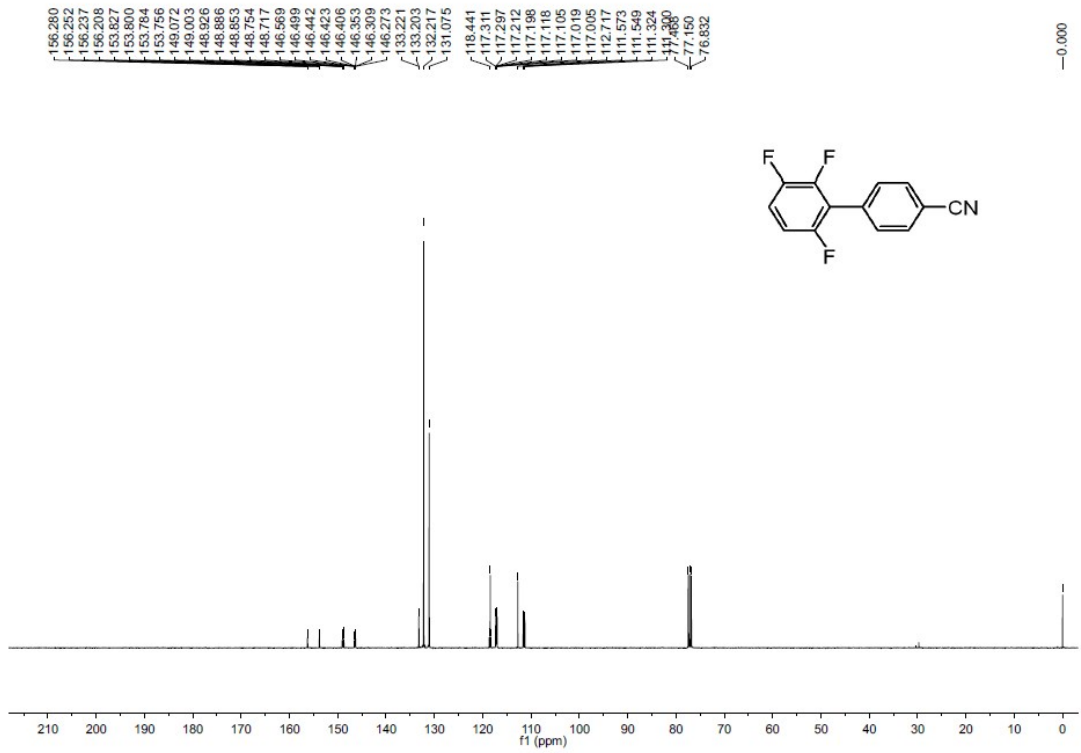

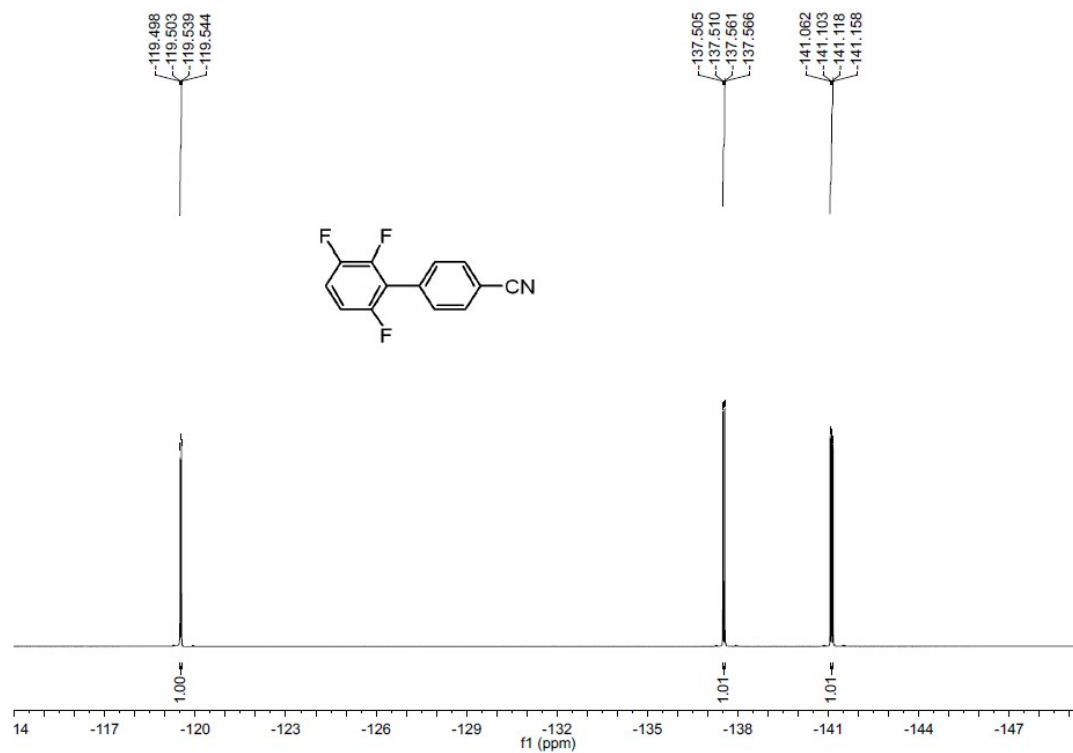

$^1\text{H}$  NMR,  $^{13}\text{C}$  NMR and  $^{19}\text{F}$  NMR spectra of **5g**

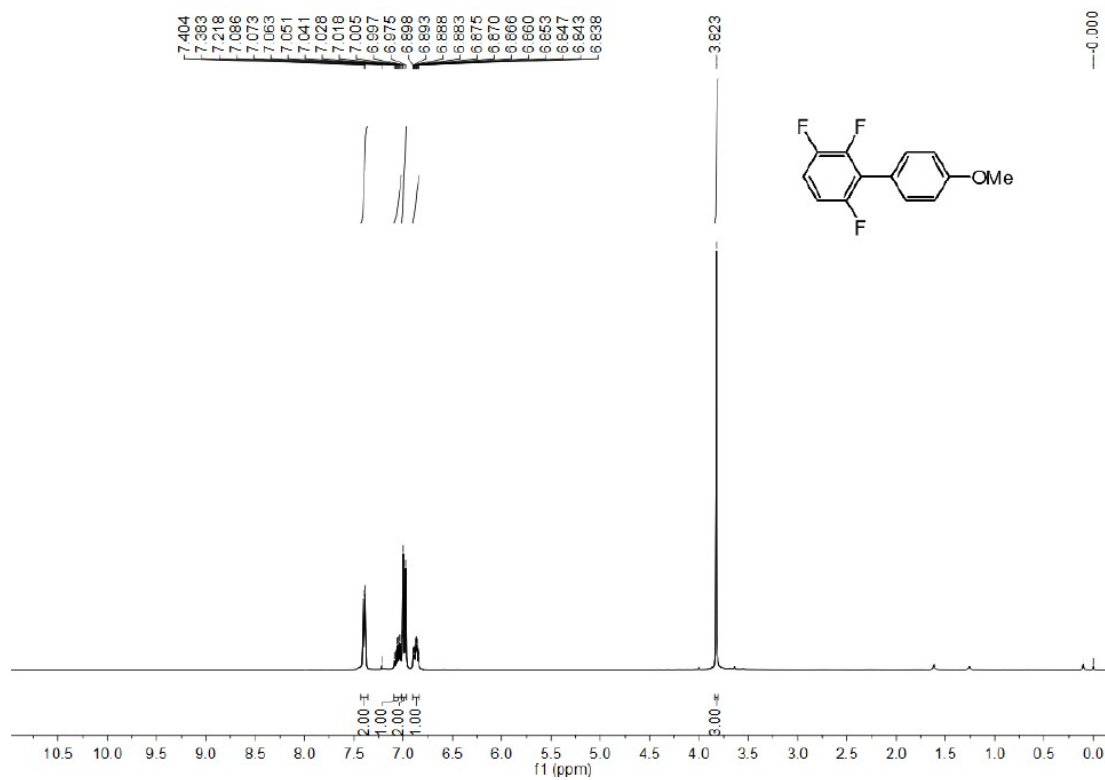

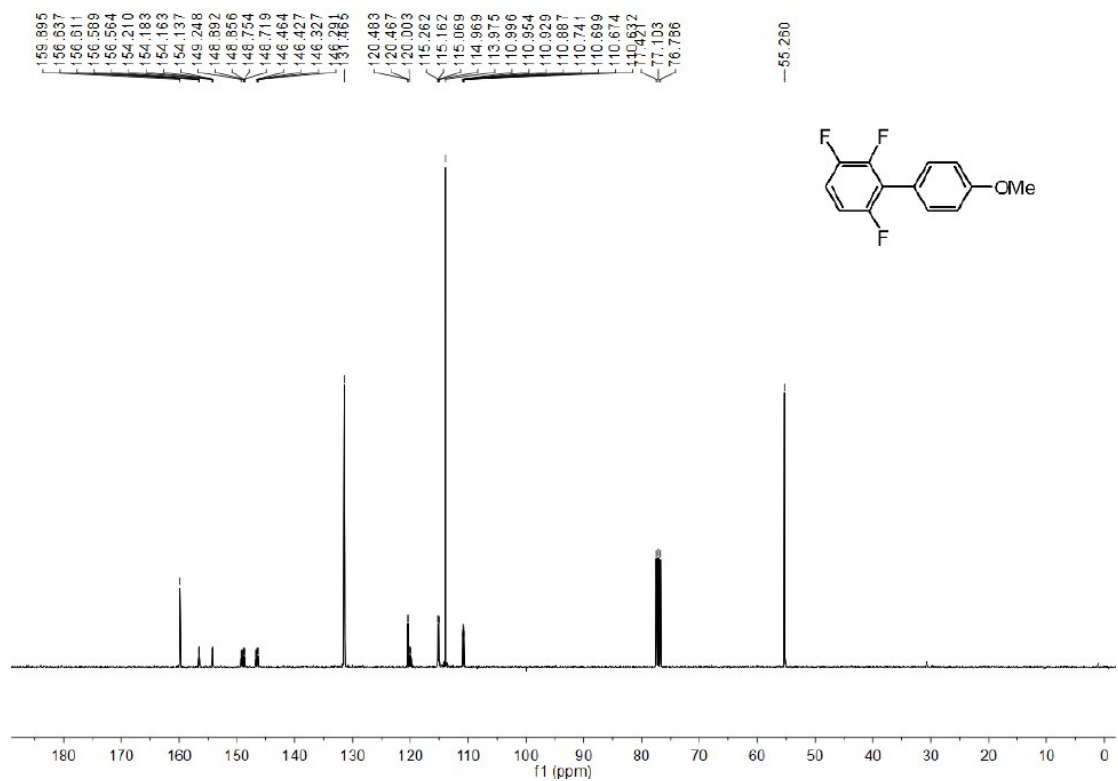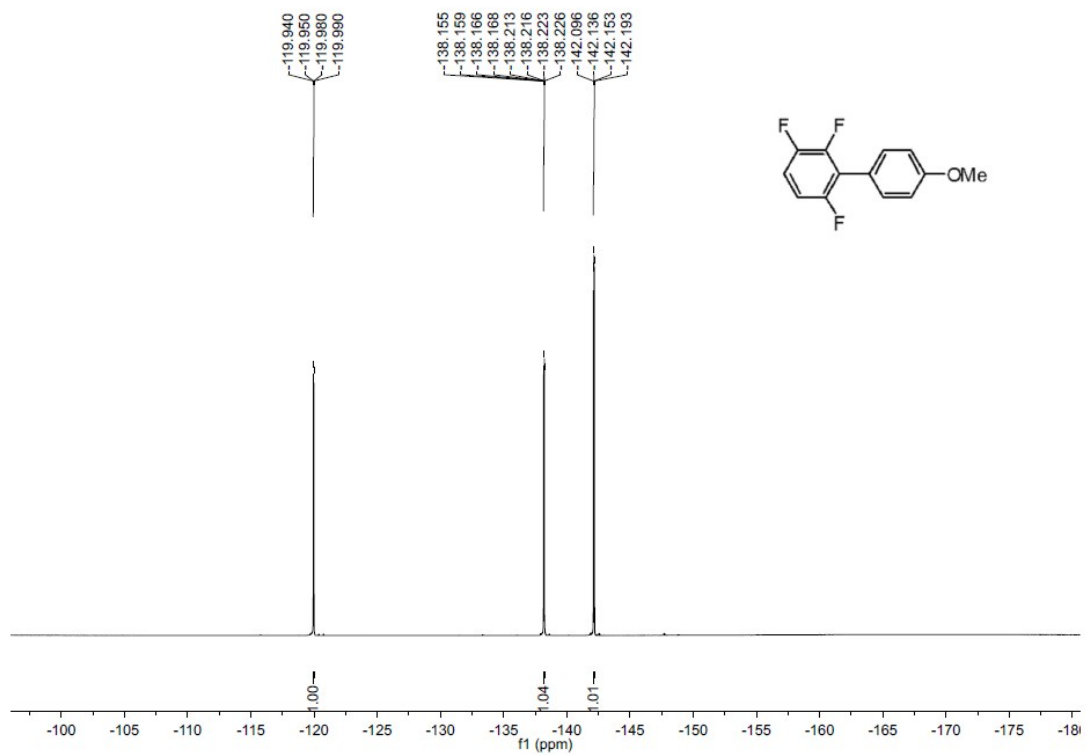

<sup>1</sup>H NMR, <sup>13</sup>C NMR and <sup>19</sup>F NMR spectra of **5h**





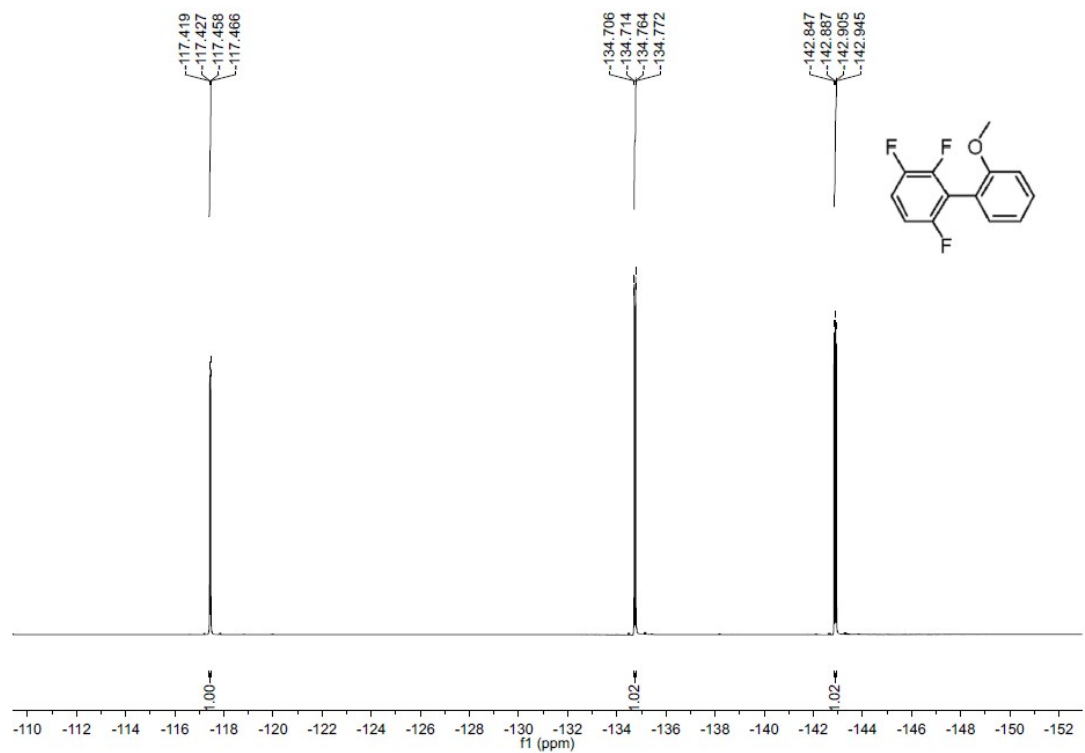

<sup>1</sup>H NMR, <sup>13</sup>C NMR and <sup>19</sup>F NMR spectra of **5i**

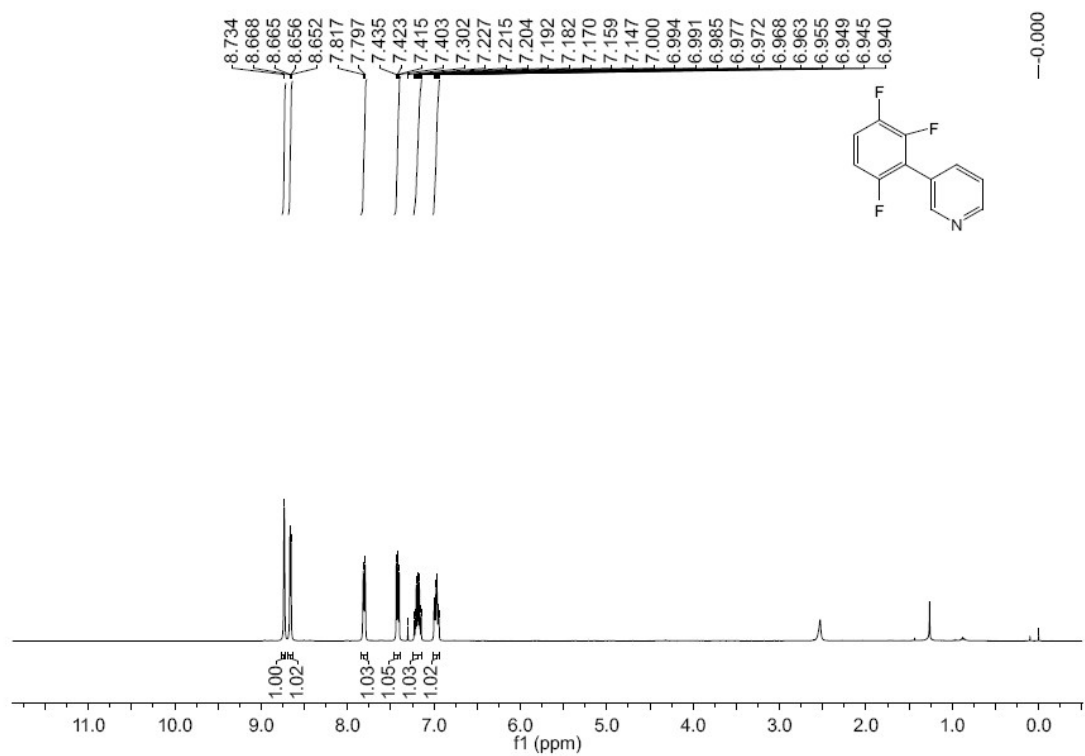

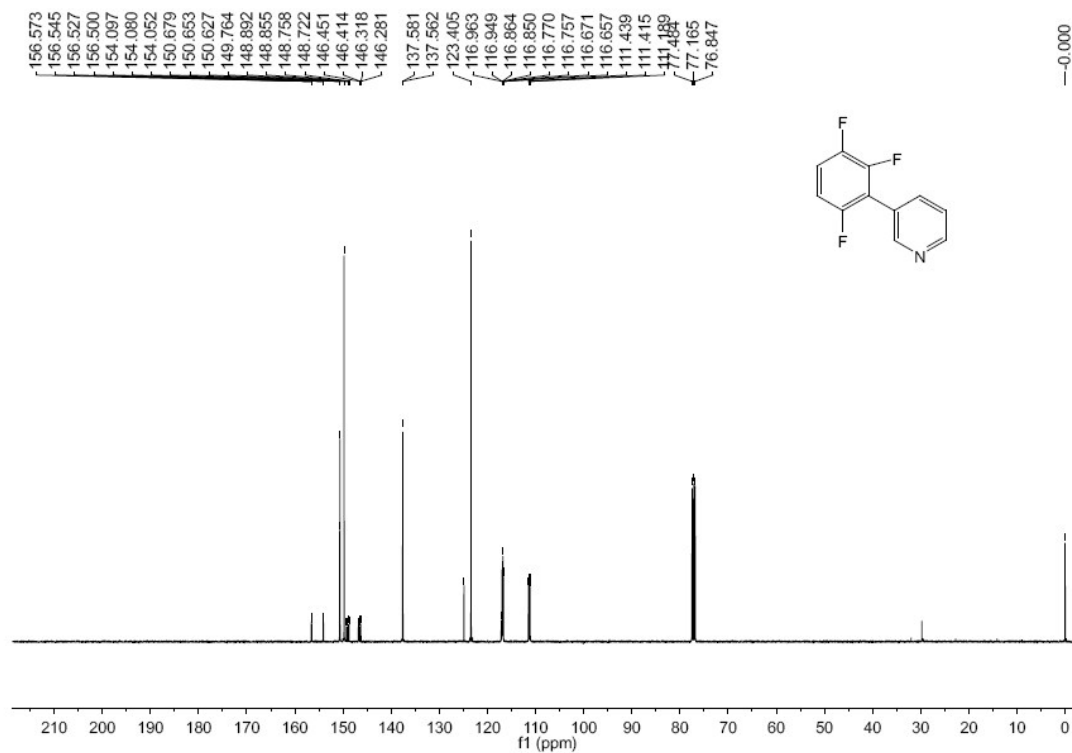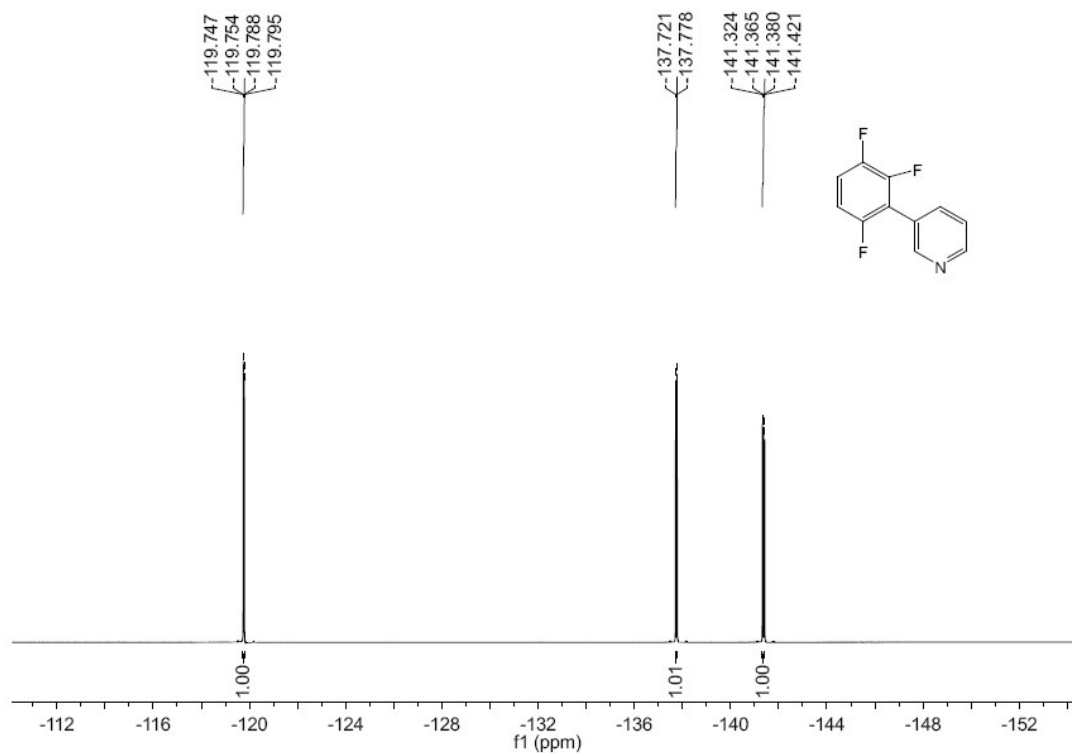

<sup>1</sup>H NMR, <sup>13</sup>C NMR and <sup>19</sup>F NMR spectra of **5j**

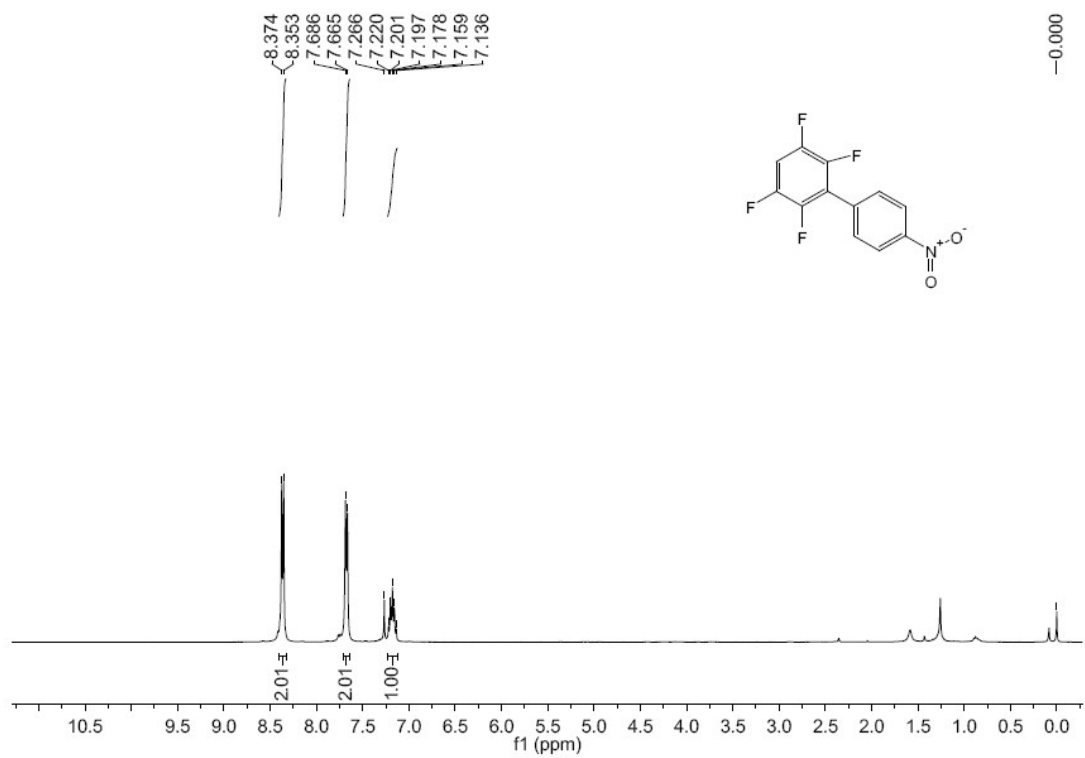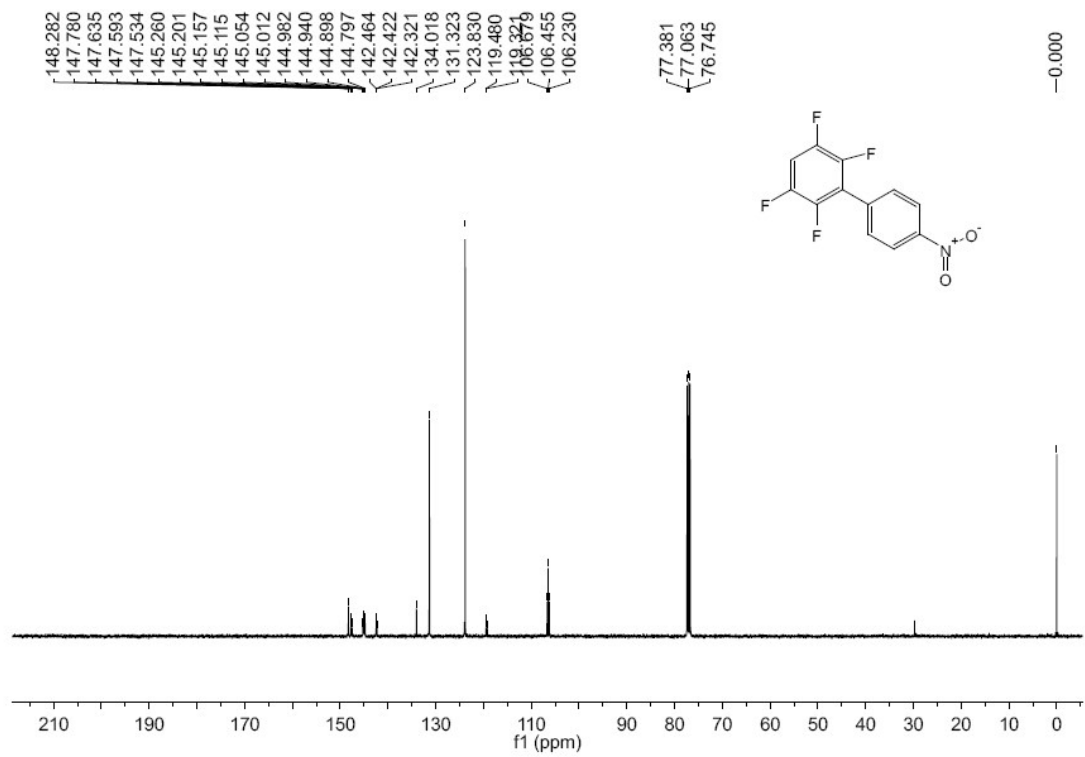

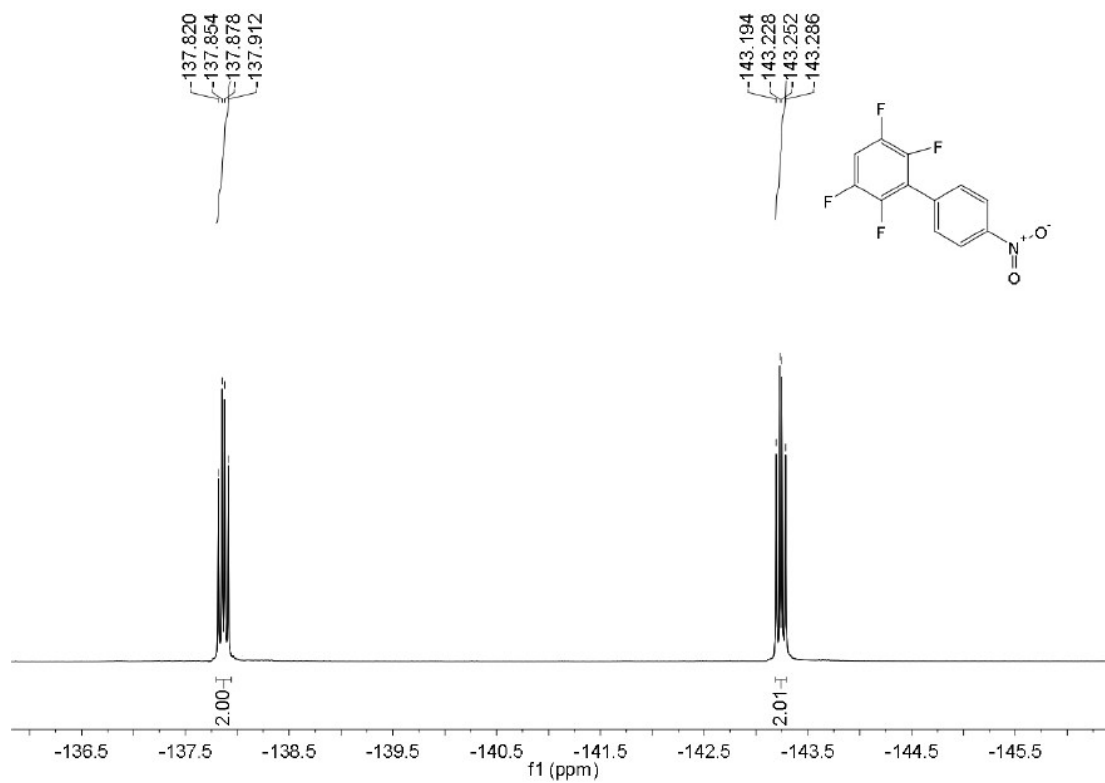

<sup>1</sup>H NMR, <sup>13</sup>C NMR and <sup>19</sup>F NMR spectra of **5k**

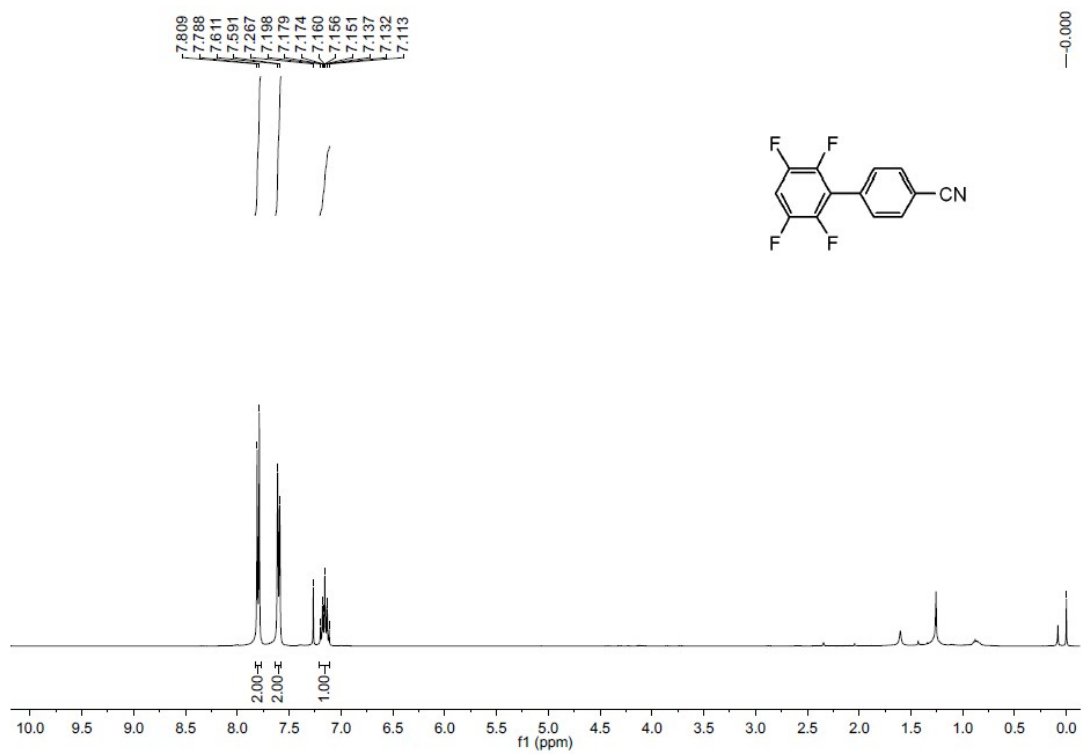

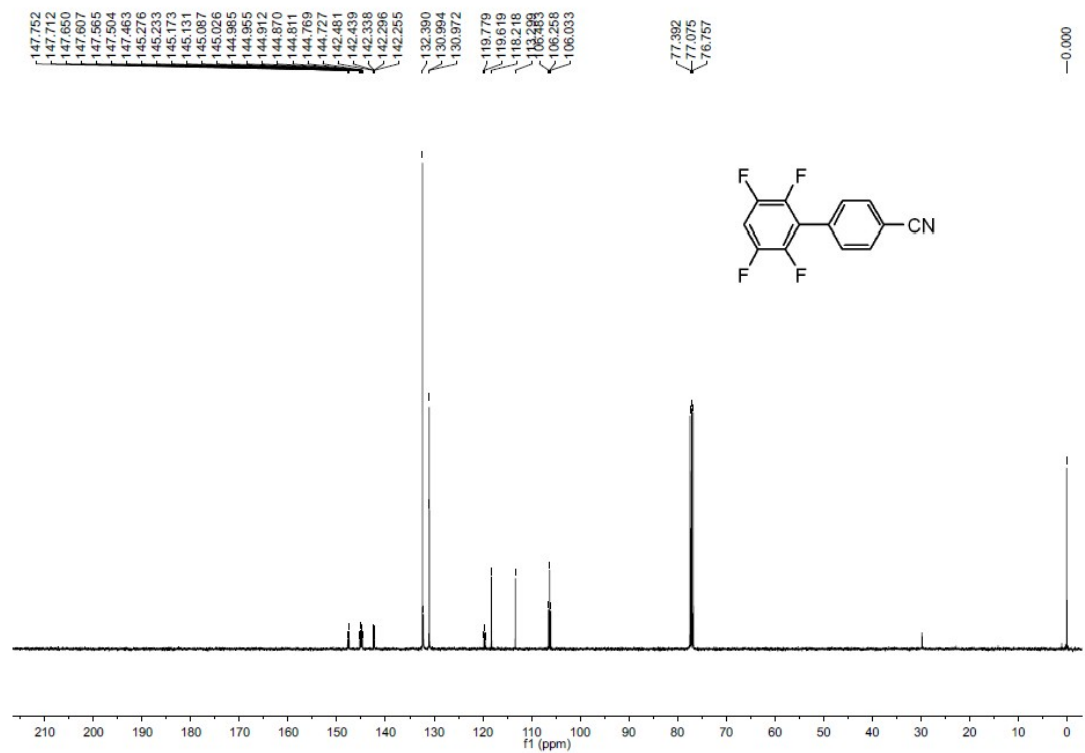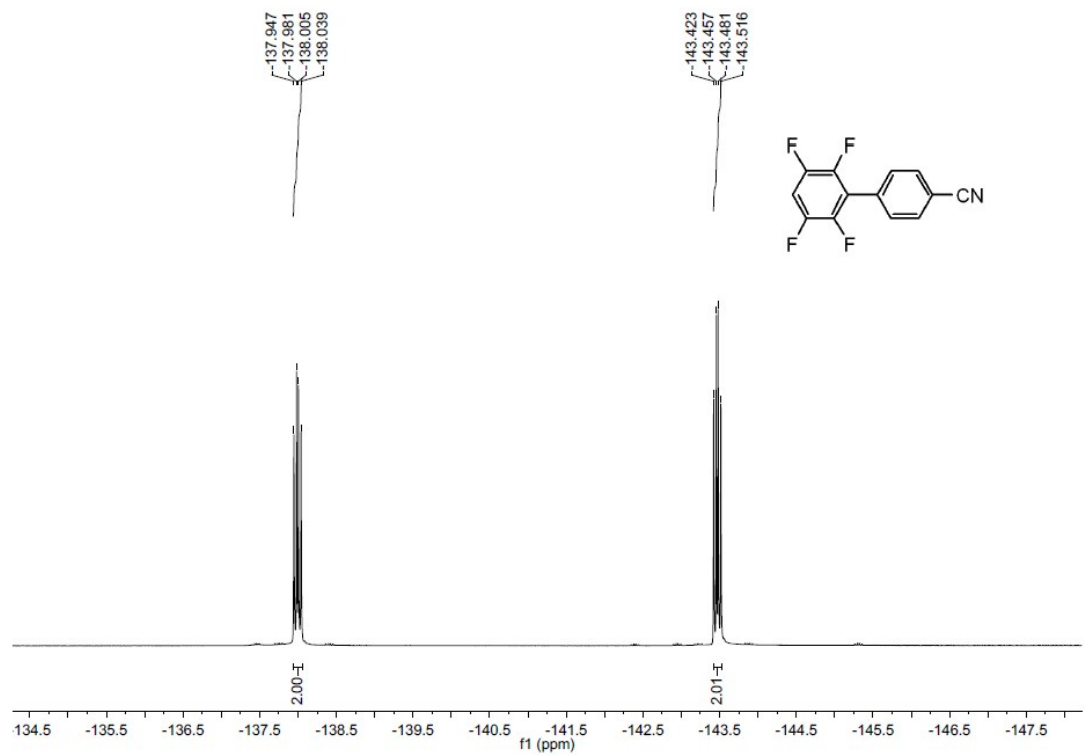

<sup>1</sup>H NMR, <sup>13</sup>C NMR and <sup>19</sup>F NMR spectra of **51**

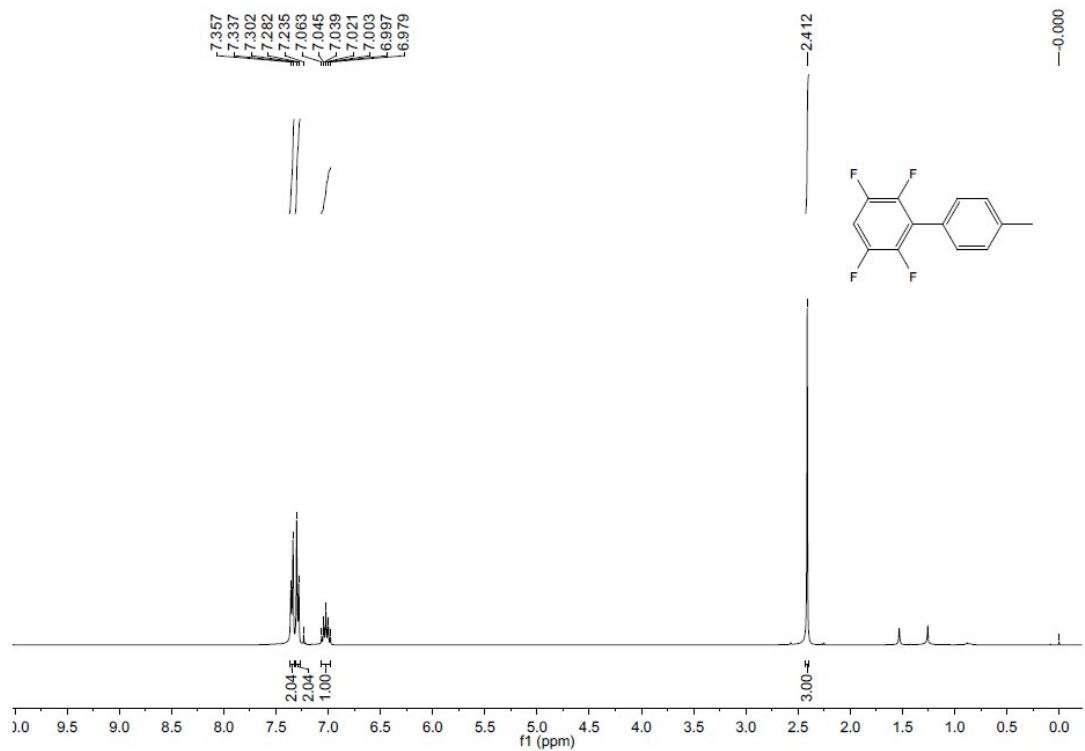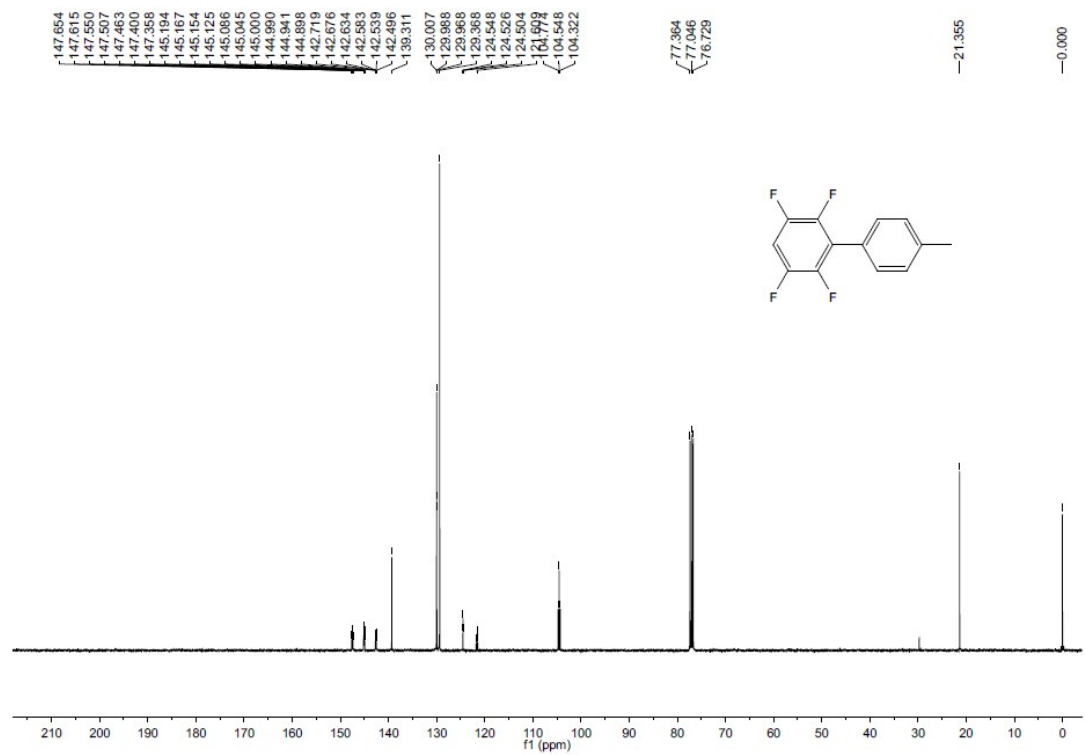

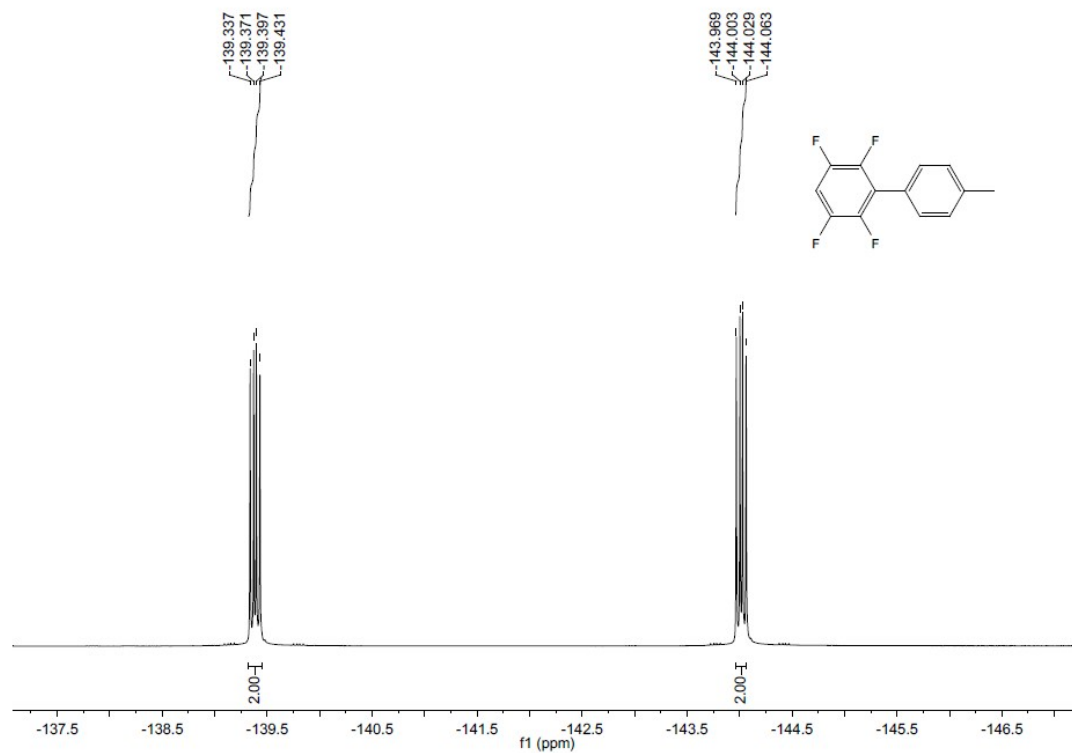

<sup>1</sup>H NMR, <sup>13</sup>C NMR and <sup>19</sup>F NMR spectra of **5m**

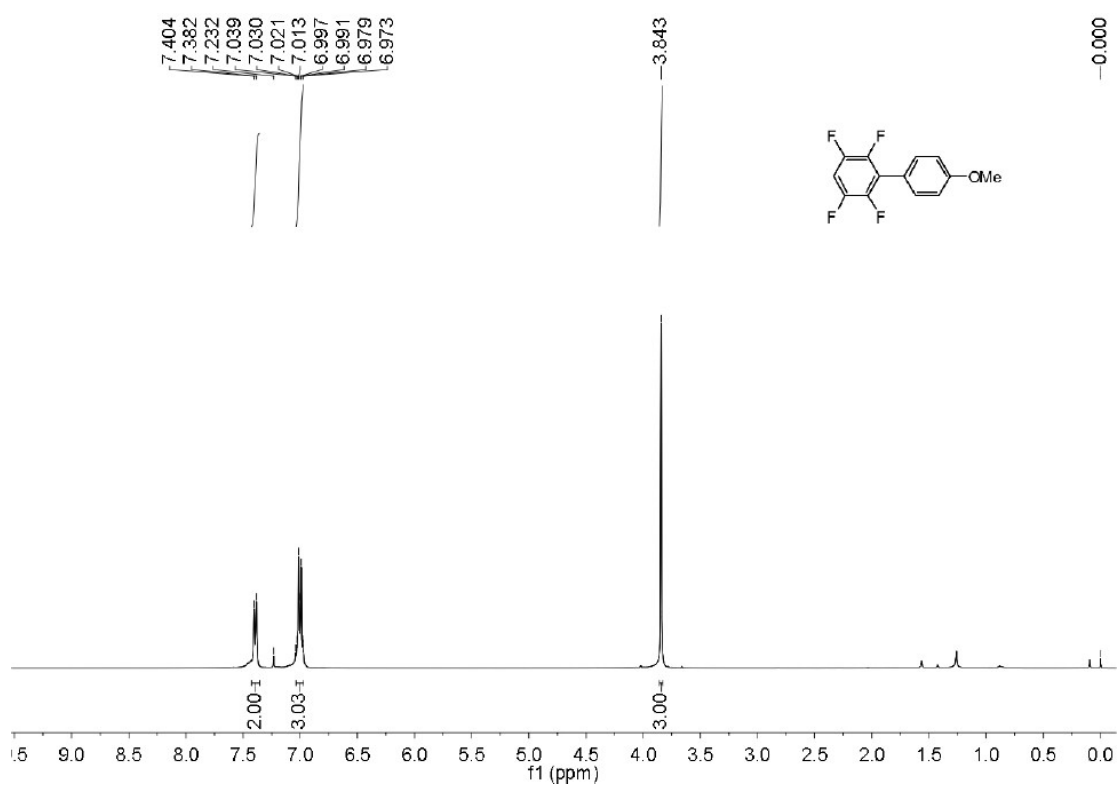



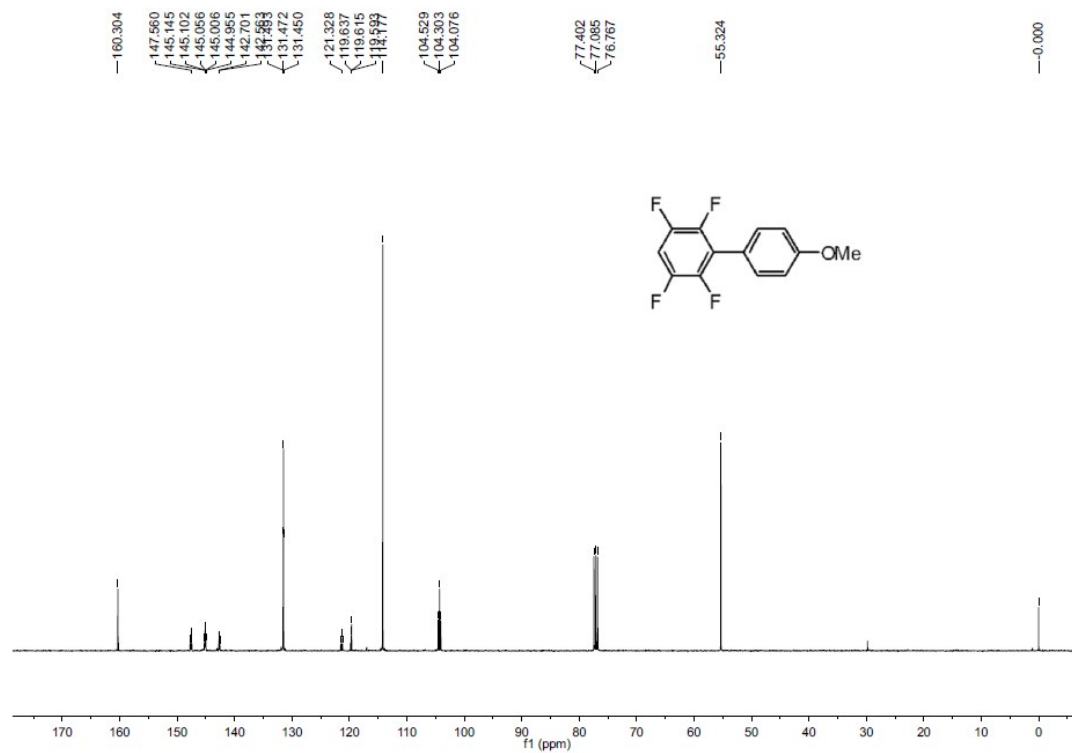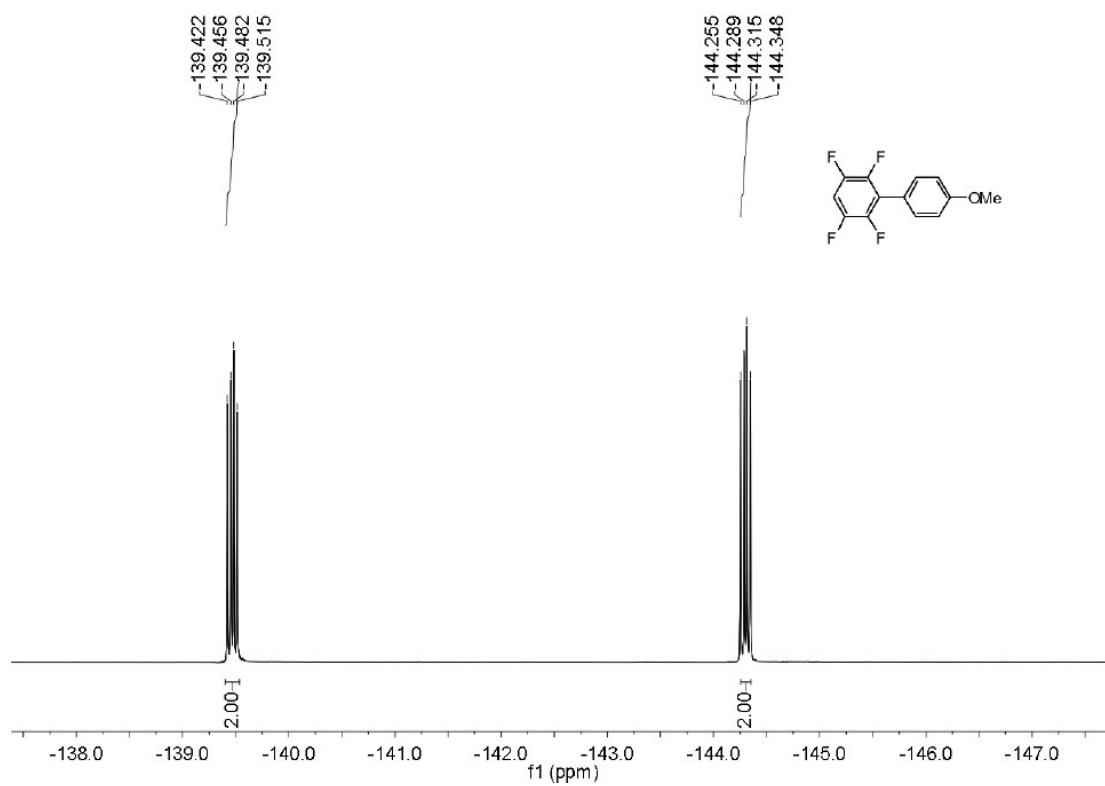

$^1\text{H}$  NMR,  $^{13}\text{C}$  NMR and  $^{19}\text{F}$  NMR spectra of **5n**

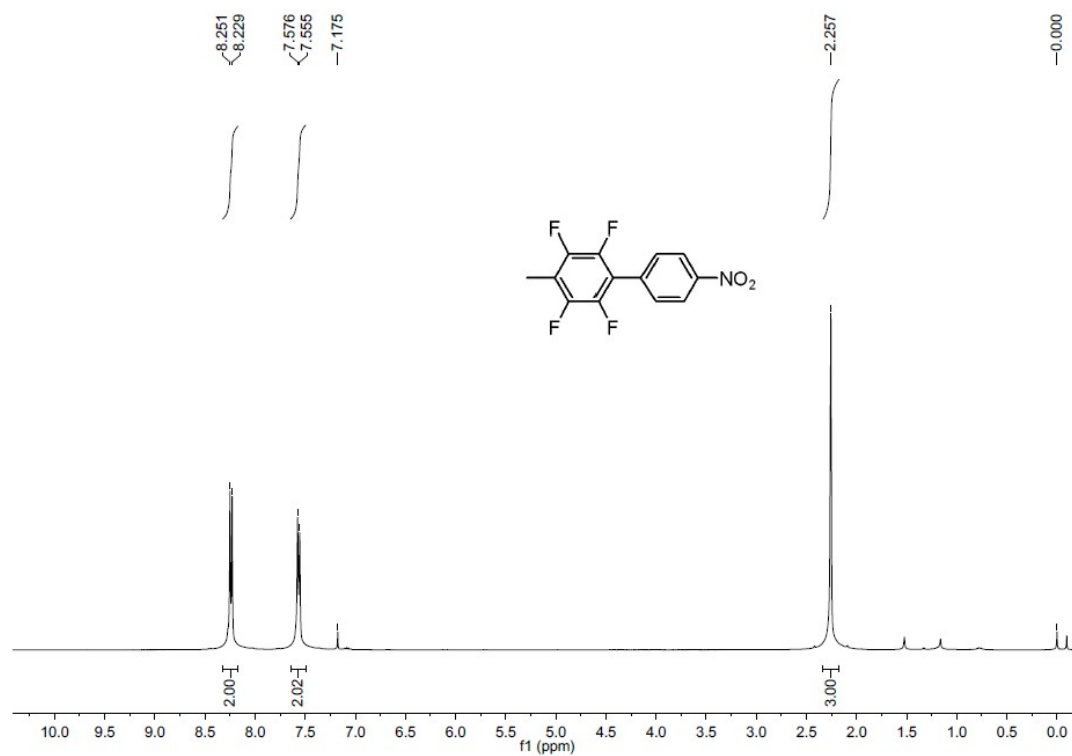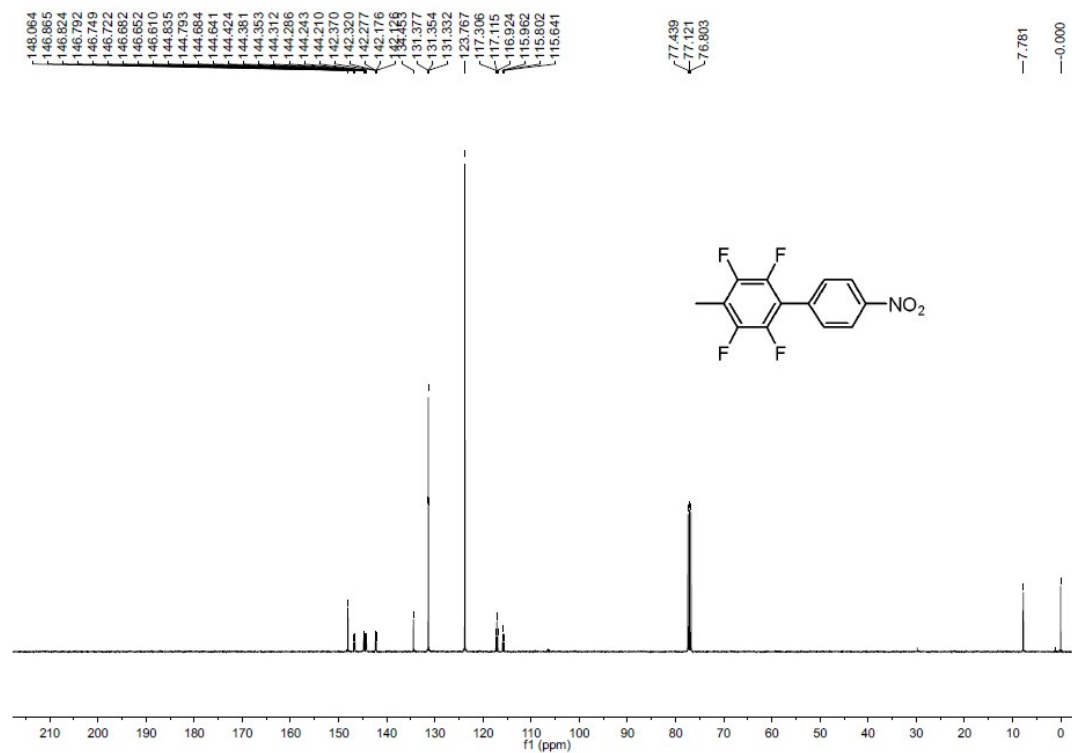

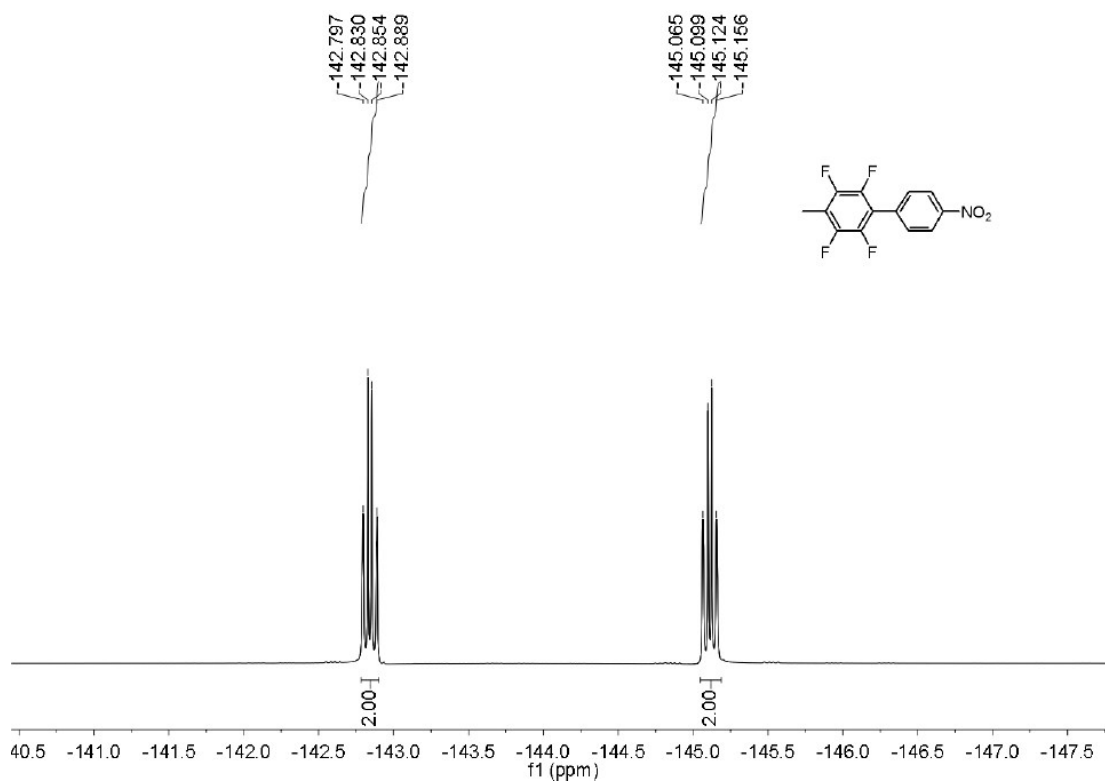

$^1\text{H}$  NMR,  $^{13}\text{C}$  NMR and  $^{19}\text{F}$  NMR spectra of **5b**

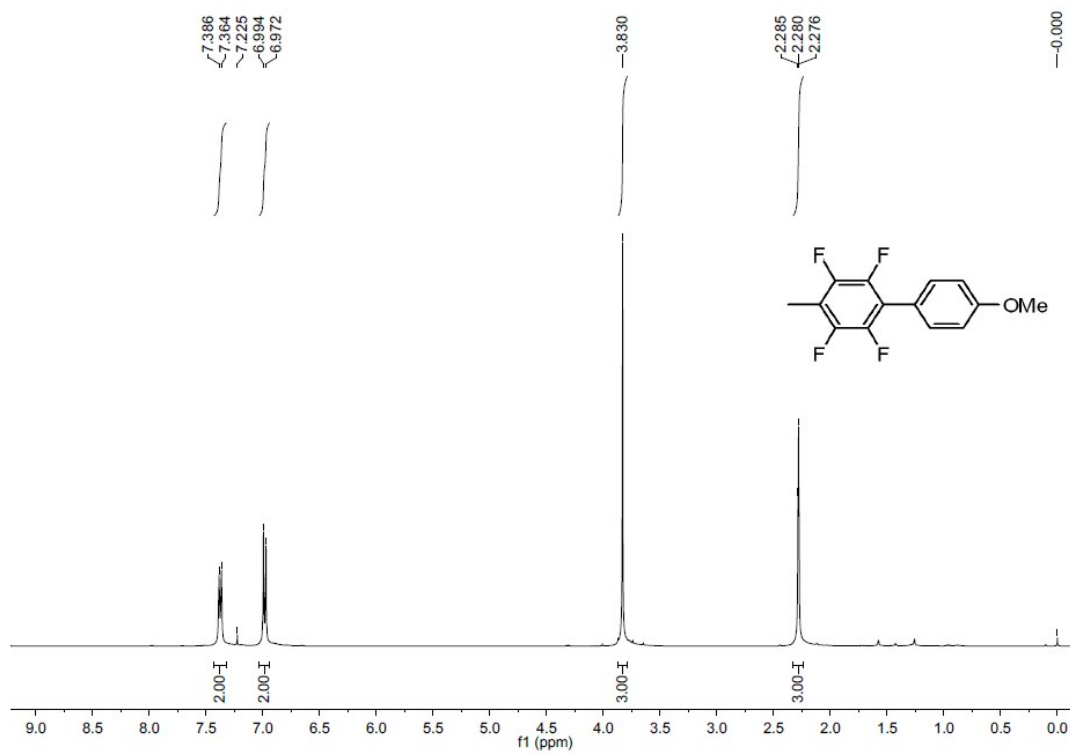

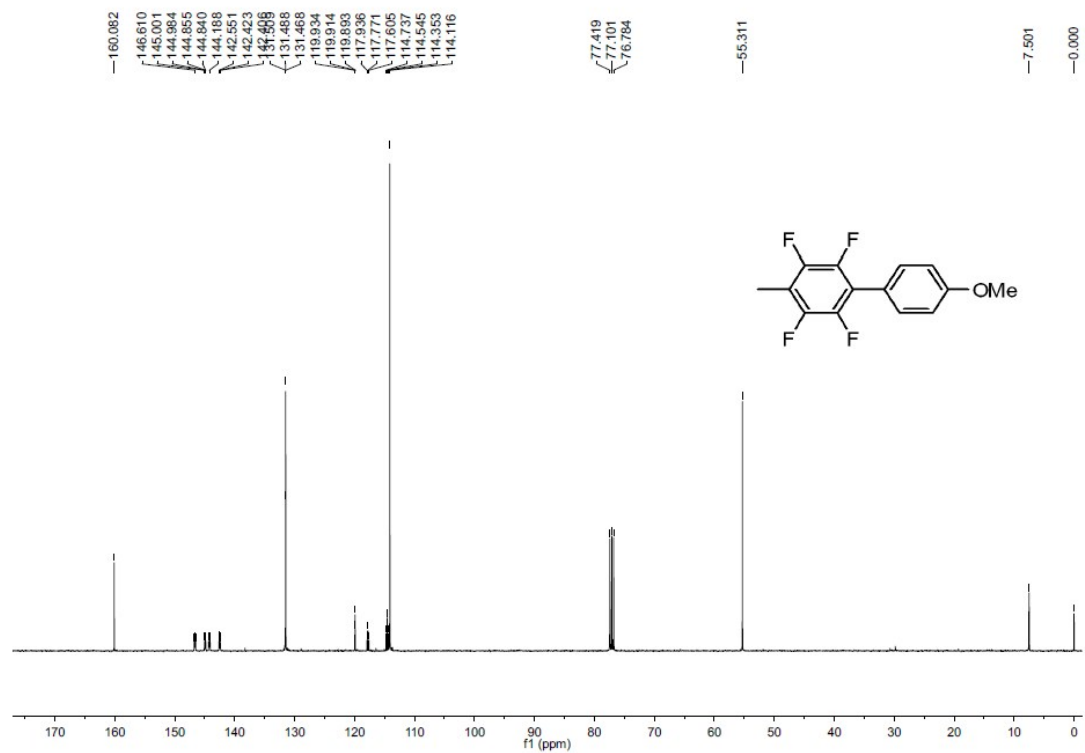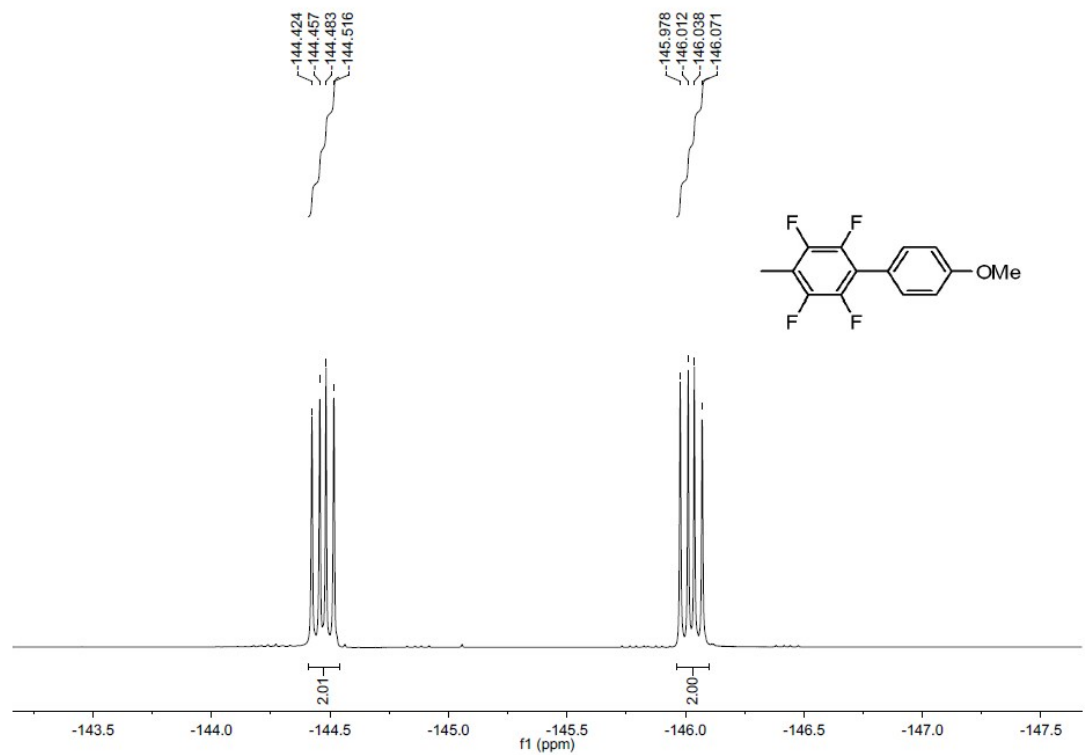

$^1\text{H}$  NMR,  $^{13}\text{C}$  NMR and  $^{19}\text{F}$  NMR spectra of **5p**
